# Supplementary material for: Facile construction of three contiguous stereogenic centers via dynamic kinetic resolution in asymmetric transfer hydrogenation of quinolines
Source: Royal Society of Chemistry journal article supplement (doi:10.1039/c4cc06060a), 2014-01-01

## Supporting Information

### Facile Construction of Three Contiguous Stereogenic Centers *via* Dynamic Kinetic Resolution in Asymmetric Transfer Hydrogenation of Quinolines

Mu-Wang Chen, Xian-Feng Cai, Zhang-Pei Chen, Lei Shi and Yong-Gui Zhou<sup>a,\*</sup>

*State Key Laboratory of Catalysis, Dalian Institute of Chemical Physics*

*Chinese Academy of Sciences, Dalian 116023, China*

Email: ygzhou@dicp.ac.cn

#### Table of Contents

|                                                                                                               |        |
|---------------------------------------------------------------------------------------------------------------|--------|
| 1. General and Materials.....                                                                                 | S2-2   |
| 2. Synthesis of 4-Substituted-1,2,3,4-tetrahydroacridines.....                                                | S2-4   |
| 3. Synthesis of Dimethyl 2,6-Dipropyl-1,4-dihydropyridine-3,5-dicarboxylate (4g).....                         | S4-4   |
| 4. Typical Procedure for Asymmetric Transfer Hydrogenation of 4-Substituted- 1,2,3,4-tetrahydroacridines..... | S5-8   |
| 5. The Determination of the Absolute Configuration of 2b.....                                                 | S8-8   |
| 6. Copy of NMR Data.....                                                                                      | S9-50  |
| 7. Copy of HPLC for Racemic and Chiral Products.....                                                          | S51-60 |



**4-Propyl-1,2,3,4-tetrahydroacridine (1c):** 42% yield, yellow oil,  $R_f = 0.48$  (petroleum ether/EtOAc = 15:1);  $^1\text{H NMR}$  (400 MHz,  $\text{CDCl}_3$ )  $\delta$  8.01 (d,  $J = 8.5$  Hz, 1H), 7.79 (s, 1H), 7.69 (d,  $J = 8.1$  Hz, 1H), 7.60 (t,  $J = 7.6$  Hz, 1H), 7.43 (t,  $J = 7.4$  Hz, 1H), 3.07 (dd,  $J = 10.0, 4.5$  Hz, 1H), 2.96 (dd,  $J = 10.1, 6.0$  Hz, 2H), 2.16 – 2.05 (m, 2H), 2.00 – 1.94 (m, 1H), 1.88 – 1.76 (m, 2H), 1.64 – 1.44 (m, 3H), 0.98 (t,  $J = 7.3$  Hz, 3H);  $^{13}\text{C NMR}$  (100 MHz,  $\text{CDCl}_3$ )  $\delta$  162.8, 146.8, 134.7, 130.8, 128.6, 128.2, 127.1, 126.8, 125.5, 41.6, 37.7, 29.6, 27.6, 20.6, 20.0, 14.3; HRMS (ESI)  $m/z$  Calculated for  $\text{C}_{16}\text{H}_{20}\text{N}$   $[\text{M}+\text{H}]^+$  226.1596, found 226.1600.

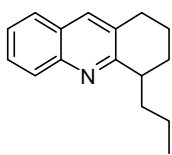

**4-Butyl-1,2,3,4-tetrahydroacridine (1d):** 41% yield, pale solid, mp = 41-42 °C,  $R_f = 0.60$  (petroleum ether/EtOAc = 15:1);  $^1\text{H NMR}$  (400 MHz,  $\text{CDCl}_3$ )  $\delta$  8.01 (d,  $J = 8.4$  Hz, 1H), 7.78 (s, 1H), 7.69 (d,  $J = 7.6$  Hz, 1H), 7.59 (ddd,  $J = 8.3, 6.8, 1.3$  Hz, 1H), 7.46 – 7.38 (m, 1H), 3.06 (dd,  $J = 10.0, 4.3$  Hz, 1H), 2.96 (dd,  $J = 10.3, 6.1$  Hz, 2H), 2.20 – 2.03 (m, 2H), 2.03 – 1.91 (m, 1H), 1.89 – 1.72 (m, 2H), 1.65 (dd,  $J = 7.8, 2.4$  Hz, 1H), 1.51 – 1.29 (m, 4H), 0.93 (t,  $J = 7.2$  Hz, 3H);  $^{13}\text{C NMR}$  (100 MHz,  $\text{CDCl}_3$ )  $\delta$  163.0, 146.9, 135.0, 131.0, 128.7, 128.4, 127.2, 126.9, 125.7, 41.9, 35.4, 29.9, 29.8, 27.6, 23.2, 20.1, 14.4; HRMS (ESI)  $m/z$  Calculated for  $\text{C}_{17}\text{H}_{22}\text{N}$   $[\text{M}+\text{H}]^+$  240.1752, found 240.1750.

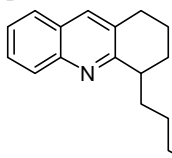

**4-Allyl-1,2,3,4-tetrahydroacridine (1e):** 81% yield, yellow oil,  $R_f = 0.68$  (petroleum ether/EtOAc = 10:1);  $^1\text{H NMR}$  (400 MHz,  $\text{CDCl}_3$ )  $\delta$  8.00 (d,  $J = 8.6$  Hz, 1H), 7.78 (s, 1H), 7.68 (d,  $J = 8.1$  Hz, 1H), 7.59 (ddd,  $J = 8.4, 6.9, 1.3$  Hz, 1H), 7.42 (t,  $J = 7.5$  Hz, 1H), 6.02 – 5.78 (m, 1H), 5.07 (ddd,  $J = 13.6, 10.9, 0.6$  Hz, 2H), 3.21 – 3.08 (m, 1H), 3.05 – 2.91 (m, 3H), 2.51 – 2.36 (m, 1H), 2.14 – 1.90 (m, 2H), 1.86 – 1.72 (m, 2H);  $^{13}\text{C NMR}$  (100 MHz,  $\text{CDCl}_3$ )  $\delta$  161.8, 147.2, 137.7, 135.0, 131.1, 128.8, 128.5, 127.3, 127.0, 125.8, 116.4, 41.4, 39.9, 29.9, 27.5, 20.3; HRMS (ESI)  $m/z$  Calculated for  $\text{C}_{16}\text{H}_{18}\text{N}$   $[\text{M}+\text{H}]^+$  224.1439, found 224.1438.

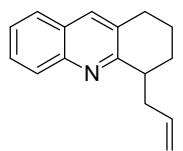

**4-Ethyl-7-methoxy-1,2,3,4-tetrahydroacridine (1g):** 61% yield, pale solid, mp = 92-93 °C,  $R_f = 0.67$  (petroleum ether/EtOAc = 10:1);  $^1\text{H NMR}$  (400 MHz,  $\text{CDCl}_3$ )  $\delta$  7.90 (d,  $J = 9.2$  Hz, 1H), 7.68 (s, 1H), 7.27 – 7.24 (m, 1H), 6.96 (d,  $J = 2.8$  Hz, 1H), 3.90 (s, 3H), 2.93 (t,  $J = 6.7$  Hz, 3H), 2.20 – 2.14 (m, 1H), 2.09 – 2.03 (m, 1H), 1.97 – 1.92 (m, 1H), 1.87 – 1.73 (m, 2H), 1.69 – 1.64 (m, 1H), 1.03 (t,  $J = 7.4$  Hz, 3H);  $^{13}\text{C NMR}$  (100 MHz,  $\text{CDCl}_3$ )  $\delta$  160.0, 157.1, 143.0, 133.7, 131.1, 130.0, 127.8, 120.9, 104.3, 55.4, 42.8, 29.7, 28.1, 27.1, 20.1, 11.8; HRMS (ESI)  $m/z$  Calculated for  $\text{C}_{16}\text{H}_{20}\text{NO}$   $[\text{M}+\text{H}]^+$  242.1545, found 242.1543.

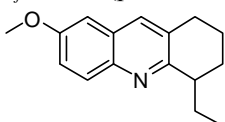

**4-Ethyl-7-fluoro-1,2,3,4-tetrahydroacridine (1h):** 53% yield, a yellow oil,  $R_f = 0.67$  (petroleum ether/EtOAc = 10:1);  $^1\text{H NMR}$  (400 MHz,  $\text{CDCl}_3$ )  $\delta$  8.08 – 7.91 (m, 1H), 7.35 (t,  $J = 8.7$  Hz, 1H), 7.30 – 7.19 (m, 1H), 2.93 (s, 3H), 2.30 – 2.12 (m, 1H), 2.11 – 2.02 (m, 1H), 2.03 – 1.88 (m, 1H), 1.89 – 1.74 (m, 2H), 1.72 – 1.58 (m, 1H), 1.04 (t,  $J = 7.4$  Hz, 3H);  $^{13}\text{C NMR}$  (100 MHz,  $\text{CDCl}_3$ )  $\delta$  162.1, 160.1 (d,  $J = 244.0$  Hz), 144.1, 134.2 (d,  $J = 5.3$  Hz), 132.0, 131.2 (d,  $J = 9.1$  Hz), 127.6 (d,  $J = 9.0$  Hz), 118.5 (d,  $J = 15.0$  Hz), 109.7 (d,  $J = 21.0$  Hz), 43.2, 29.8, 28.2, 27.2, 20.2, 12.0;  $^{19}\text{F NMR}$  (376 MHz,  $\text{CDCl}_3$ )  $\delta$  -115.3; HRMS (ESI)  $m/z$  Calculated for  $\text{C}_{15}\text{H}_{17}\text{NF}$   $[\text{M}+\text{H}]^+$  230.1345, found 242.1340.

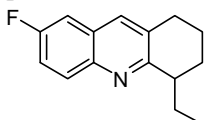

## 2.2. Synthesis of 4-phenyl-1,2,3,4-tetrahydroacridine (1i):

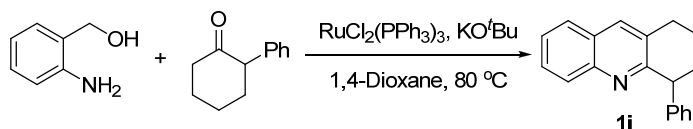

Typical procedure: a mixture of 2-aminobenzyl alcohol (0.616 mg, 5.0 mmol), 2-phenylcyclohexanone (1.307 mg, 7.5 mmol),  $\text{RuCl}_2(\text{PPh}_3)_3$  (0.024 mg, 0.025 mmol) and  $\text{KO}^t\text{Bu}$  (0.561 mg, 5.0 mmol) in 1,4-dioxane (10 ml) was placed in a dry 50 mL Schlenk tube. The system was flushed with argon and allowed to react at  $80\text{ }^\circ\text{C}$  for 16 h. The reaction mixture was filtered through a short silica gel column (ethyl acetate), washed with brine and dried over  $\text{Na}_2\text{SO}_4$ . Removal of the solvent left a crude mixture, which was separated by flash chromatography on silica gel (petroleum ether/EtOAc = 15:1) to yield the product **1i**.

**4-Phenyl-1,2,3,4-tetrahydroacridine (1i):** Pale solid, 72% yield, mp =  $133\text{--}134\text{ }^\circ\text{C}$ ,  $R_f$  = 0.43 (petroleum ether/EtOAc = 15:1);  $^1\text{H}$  NMR (400 MHz,  $\text{CDCl}_3$ )  $\delta$  8.00 – 7.83 (m, 2H), 7.70 (d,  $J$  = 8.1 Hz, 1H), 7.54 (t,  $J$  = 7.4 Hz, 1H), 7.41 (t,  $J$  = 7.3 Hz, 1H), 7.17 (dt,  $J$  = 13.2, 7.1 Hz, 3H), 6.96 (d,  $J$  = 7.1 Hz, 2H), 4.54 (d,  $J$  = 4.7 Hz, 1H), 3.16 – 2.85 (m, 2H), 2.38 – 2.07 (m, 2H), 1.98 – 1.63 (m, 2H);  $^{13}\text{C}$  NMR (100 MHz,  $\text{CDCl}_3$ )  $\delta$  160.3, 147.1, 146.3, 135.2, 131.5, 129.1, 128.8, 128.4, 128.1, 127.4, 126.8, 125.9, 125.8, 48.3, 32.6, 29.3, 19.2; HRMS (ESI)  $m/z$  Calculated for  $\text{C}_{19}\text{H}_{18}\text{N}$   $[\text{M}+\text{H}]^+$  260.1439, found 260.1440.

## 3. Synthesis of Dimethyl 2,6-dipropyl-1,4-dihydropyridine-3,5-dicarboxylate (4g)

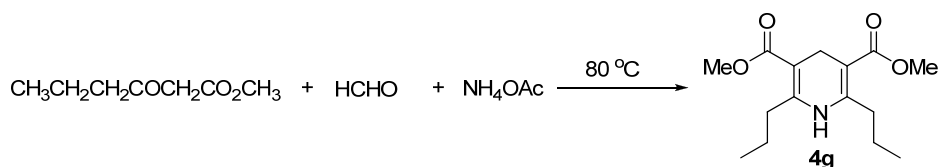

In a dry Schlenk tube, 7.209 g (50.0 mmol, 2.0 eq.) of methyl 3-oxohexanoate, 2.538 g (25.0 mmol, 1.0 eq.) of formaldehyde solution (37-40%) and 2.891 g (37.5 mmol, 1.5 eq.) of ammonium acetate at  $80\text{ }^\circ\text{C}$  under a nitrogen atmosphere. The solution was stirred until complete consumption of methyl 3-oxohexanoate (monitored by TLC). Allowed to stand at room temperature and to facilitate crystallization of the compounds, the reaction mixture was scratched with a glass rod. Yellow crystals of dimethyl 2,6-dipropyl-1,4-dihydropyridine-3,5-dicarboxylate were formed. The product was recrystallized from ethanol. [3]

**Dimethyl 2,6-dipropyl-1,4-dihydropyridine-3,5-dicarboxylate (4g):** Yellow solid, 32% yield, mp =  $107\text{--}108\text{ }^\circ\text{C}$ ,  $R_f$  = 0.46 (petroleum ether/EtOAc = 10:1);  $^1\text{H}$  NMR (400 MHz,  $\text{CDCl}_3$ )  $\delta$  5.31 (s, 1H), 3.69 (s, 6H), 3.27 (s, 2H), 2.61 – 2.49 (m, 4H), 1.56 (dd,  $J$  = 15.3, 7.5 Hz, 4H), 0.97 (t,  $J$  = 7.3 Hz, 6H);  $^{13}\text{C}$  NMR (100 MHz,  $\text{CDCl}_3$ )  $\delta$  168.1, 149.9, 98.8, 51.1, 34.3, 25.1, 21.8, 14.1; HRMS (ESI)  $m/z$  Calculated for  $\text{C}_{15}\text{H}_{24}\text{NO}_4$   $[\text{M}+\text{H}]^+$  283.1778, found 283.1741.

[3] M. Anniyappan, D. Muralidharan, P. T. Perumal, *Synth. Commun.* **2002**, 32, 659.

#### 4. Typical Procedure for Asymmetric Transfer Hydrogenation of 4-Substituted -1,2,3,4-tetrahydroacridines **2**:

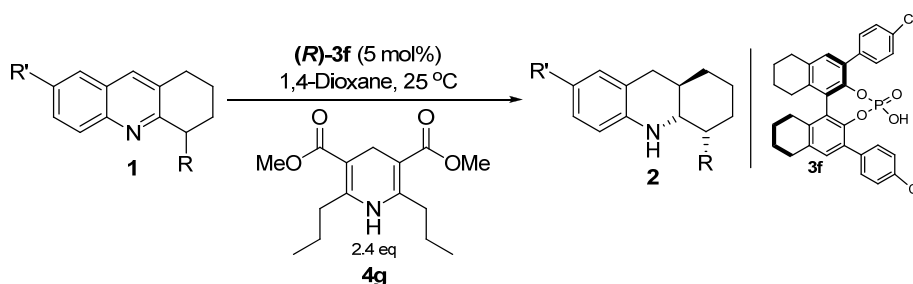

Typical procedure: In a dry Schlenk tube, 4-substituted-1,2,3,4-tetrahydroacridines **1** (0.20 mmol), and phosphoric acid (*R*)-**3f** (5.8 mg, 0.01 mmol) and Hantzsch ester **4g** (134.9 mg, 0.48 mmol) were dissolved in 1,4-dioxane (3 mL) at 25 °C under a nitrogen atmosphere. The solution was stirred until complete consumption of **1** (monitored by TLC). After removal of the solvent under reduced pressure, the residue was purified by flash chromatography (petroleum ether/ethyl acetate, 30:1) to afford the desired products.

Typical procedure for preparation of racemates of **2**: In a dry Schlenk tube, 4-substituted -1,2,3,4-tetrahydroacridines **1** (0.20 mmol), and 1,1'-Binaphthyl-2,2'-diylhydrogenphosphate (3.5 mg, 0.01 mmol), and Hantzsch ester **4a** (134.9 mg, 0.48 mmol) were dissolved in 1,4-dioxane (3 mL) at 25 °C under a nitrogen atmosphere. The solution was stirred until complete consumption of **1** (monitored by TLC). After removal of the solvent under reduced pressure, the residue was purified by flash chromatography (petroleum ether/ethyl acetate, 30:1) to afford the desired products.

**(4*S*,4*aS*,9*aR*)-4-Methyl-1,2,3,4,4*a*,9,9*a*,10-octahydroacridine (2a)**: Pale solid, mp = 51-53 °C, 99% yield,  $R_f = 0.82$  (petroleum ether/EtOAc = 30:1), 82% ee,  $[\alpha]_D^{21} = -45.8$  ( $c$  0.90, CHCl<sub>3</sub>); <sup>1</sup>H NMR (400 MHz, CDCl<sub>3</sub>) δ 6.96 (m, 2H), 6.56 (t,  $J = 7.3$  Hz, 1H), 6.46 (d,  $J = 7.9$  Hz, 1H), 3.50 (brs, 1H), 3.03 (dd,  $J = 10.4, 4.5$  Hz, 1H), 2.65 (dd,  $J = 16.0, 4.8$  Hz, 1H), 2.43 (dd,  $J = 15.9, 11.8$  Hz, 1H), 2.09 – 1.91 (m, 1H), 1.90 – 1.80 (m, 1H), 1.79 – 1.70 (m, 1H), 1.67 – 1.58 (m, 2H), 1.57 – 1.45 (m, 2H), 0.98 (d,  $J = 7.1$  Hz, 4H); <sup>13</sup>C NMR (100 MHz, CDCl<sub>3</sub>) δ 145.0, 129.0, 126.7, 120.9, 116.4, 113.3, 58.6, 34.9, 32.6, 32.4, 31.4, 30.1, 19.9, 11.9; HPLC (OJ-H, elute: Hexanes/*i*-PrOH = 95/5, detector: 254 nm, flow rate: 0.8 mL/min, 30 °C,  $t_1 = 11.7$  min (maj),  $t_2 = 18.0$  min; HRMS (ESI)  $m/z$  Calculated for C<sub>14</sub>H<sub>20</sub>N [M+H]<sup>+</sup> 202.1596, found 202.1591.

**(4*R*,4*aS*,9*aR*)-4-methyl-1,2,3,4,4*a*,9,9*a*,10-octahydroacridine (2a')**:  $R_f = 0.83$  (petroleum ether/EtOAc = 30:1); <sup>1</sup>H NMR (400 MHz, CDCl<sub>3</sub>) δ 6.94 (dd,  $J = 14.8, 7.5$  Hz, 2H), 6.56 (dd,  $J = 10.6, 4.0$  Hz, 1H), 6.46 (d,  $J = 7.9$  Hz, 1H), 3.58 (s, 1H), 3.37 (t,  $J = 2.6$  Hz, 1H), 3.04 (dd,  $J = 16.2, 5.7$  Hz, 1H), 2.41 (d,  $J = 15.3$  Hz, 1H), 1.86 (s, 1H), 1.77 – 1.62 (m, 2H), 1.33 (dt,  $J = 8.0, 6.3$  Hz, 5H), 1.01 (d,  $J = 7.1$  Hz, 3H); <sup>13</sup>C NMR (100 MHz, CDCl<sub>3</sub>) δ 144.0, 129.8, 126.5, 119.7, 116.6, 113.6, 54.3, 36.0, 34.9, 34.0, 27.4, 26.0, 25.9, 18.5; HRMS (ESI)  $m/z$  Calculated for C<sub>14</sub>H<sub>20</sub>N [M+H]<sup>+</sup> 202.1596, found 202.1599.

**(4*S*,4*aS*,9*aR*)-4-Ethyl-1,2,3,4,4*a*,9,9*a*,10-octahydroacridine (2b)**: Pale solid, mp = 66-68 °C, 91% yield,  $R_f = 0.83$  (petroleum ether/EtOAc = 30:1), 88% ee,  $[\alpha]_D^{20} = -49.2$  ( $c$  1.0, CHCl<sub>3</sub>); <sup>1</sup>H NMR (400 MHz, CDCl<sub>3</sub>) δ 6.99 – 6.86 (m, 2H), 6.54 (td,  $J = 7.4, 0.9$  Hz, 1H), 6.45 (d,  $J = 7.9$  Hz, 1H), 3.48 (brs, 1H), 3.06 (dd,  $J = 10.5, 4.2$  Hz, 1H), 2.62 (dd,  $J = 16.0, 4.8$  Hz, 1H), 2.40 (dd,  $J = 16.0, 11.7$  Hz, 1H), 1.89 – 1.80 (m, 2H), 1.75 – 1.59 (m, 3H), 1.54 – 1.38 (m, 3H), 1.36 – 1.22

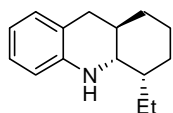

(m, 1H), 1.05 – 0.95 (m, 1H), 0.92 (t,  $J = 7.4$  Hz, 3H);  $^{13}\text{C}$  NMR (100 MHz,  $\text{CDCl}_3$ )  $\delta$  145.0, 129.0, 126.7, 120.8, 116.3, 113.3, 59.3, 40.6, 35.0, 32.6, 30.8, 27.2, 19.9, 17.3, 12.9; HPLC (OJ-H, elute: Hexanes/*i*-PrOH = 95/5, detector: 254 nm, flow rate: 0.8 mL/min), 30 °C,  $t_1 = 9.2$  min (maj),  $t_2 = 16.1$  min; HRMS (ESI)  $m/z$  Calculated for  $\text{C}_{15}\text{H}_{22}\text{N}$   $[\text{M}+\text{H}]^+$  216.1752, found 216.1758.

**(4S,4aS,9aR)-4-Propyl-1,2,3,4,4a,9,9a,10-octahydroacridine (2c):** Pale solid, mp = 39-40 °C, 84% yield,  $R_f = 0.80$  (petroleum ether/EtOAc = 30:1), 84% ee,  $[\alpha]_D^{22} = -39.9$  ( $c$  0.80,  $\text{CHCl}_3$ );

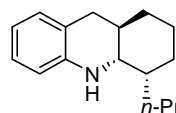

$^1\text{H}$  NMR (400 MHz,  $\text{CDCl}_3$ )  $\delta$  7.00 – 6.85 (m, 2H), 6.55 (t,  $J = 7.1$  Hz, 1H), 6.46 (d,  $J = 7.9$  Hz, 1H), 3.48 (brs, 1H), 3.05 (dd,  $J = 10.5, 4.4$  Hz, 1H), 2.63 (dd,  $J = 16.0, 4.8$  Hz, 1H), 2.41 (dd,  $J = 15.9, 11.7$  Hz, 1H), 1.91 – 1.63 (m, 4H), 1.62 – 1.39 (m, 6H), 1.37 – 1.15 (m, 2H), 1.05 – 0.95 (m, 1H), 0.92 (t,  $J = 7.1$  Hz, 3H);  $^{13}\text{C}$  NMR (100 MHz,  $\text{CDCl}_3$ )  $\delta$  145.0, 129.0, 126.7, 120.8, 116.3, 113.2, 59.2, 38.4, 35.0, 32.6, 30.8, 27.9, 27.0, 21.6, 20.0, 14.5; HPLC (OJ-H, elute: Hexanes/*i*-PrOH = 95/5, detector: 254 nm, flow rate: 0.8 mL/min), 30 °C,  $t_1 = 7.2$  min (maj),  $t_2 = 8.3$  min; HRMS (ESI)  $m/z$  Calculated for  $\text{C}_{16}\text{H}_{24}\text{N}$   $[\text{M}+\text{H}]^+$  230.1909, found 230.1918.

**(4S,4aS,9aR)-4-Butyl-1,2,3,4,4a,9,9a,10-octahydroacridine (2d):** Pale solid, mp = 44-45 °C, 71% yield,  $R_f = 0.81$  (petroleum ether/EtOAc = 30:1), 85% ee,  $[\alpha]_D^{21} = -37.9$  ( $c$  0.87,  $\text{CHCl}_3$ );

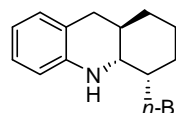

$^1\text{H}$  NMR (400 MHz,  $\text{CDCl}_3$ )  $\delta$  7.00 – 6.84 (m, 2H), 6.55 (td,  $J = 7.4, 0.9$  Hz, 1H), 6.46 (d,  $J = 7.9$  Hz, 1H), 3.48 (brs, 1H), 3.06 (dd,  $J = 10.5, 4.4$  Hz, 1H), 2.63 (dd,  $J = 16.0, 4.8$  Hz, 1H), 2.41 (dd,  $J = 16.0, 11.7$  Hz, 1H), 1.89 – 1.77 (m, 2H), 1.76 – 1.63 (m, 2H), 1.63 – 1.46 (m, 4H), 1.45 – 1.28 (m, 4H), 1.23 – 1.12 (m, 1H), 1.06 – 0.94 (m, 1H), 0.91 (t,  $J = 7.1$  Hz, 3H);  $^{13}\text{C}$  NMR (100 MHz,  $\text{CDCl}_3$ )  $\delta$  145.0, 129.0, 126.7, 120.8, 116.3, 113.2, 59.2, 38.6, 35.0, 32.6, 30.8, 30.7, 27.8, 24.3, 23.1, 20.0, 14.2; HPLC (OJ-H, elute: Hexanes/*i*-PrOH = 98/2, detector: 254 nm, flow rate: 0.7 mL/min), 30 °C,  $t_1 = 9.7$  min (maj),  $t_2 = 11.1$  min; HRMS (ESI)  $m/z$  Calculated for  $\text{C}_{17}\text{H}_{26}\text{N}$   $[\text{M}+\text{H}]^+$  244.2065, found 244.2068.

**(4R,4aS,9aR)-4-Allyl-1,2,3,4,4a,9,9a,10-octahydroacridine (2e):** Pale oil, 82% yield,  $R_f = 0.65$  (petroleum ether/EtOAc = 30:1), 89% ee,  $[\alpha]_D^{22} = -52.6$  ( $c$  0.67,  $\text{CHCl}_3$ );  $^1\text{H}$  NMR (400 MHz,

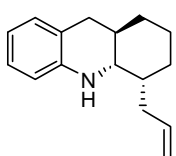

$\text{CDCl}_3$ )  $\delta$  6.96 – 6.74 (m, 2H), 6.49 (td,  $J = 7.4, 0.9$  Hz, 1H), 6.39 (d,  $J = 7.9$  Hz, 1H), 5.81 – 5.61 (m, 1H), 5.06 – 4.81 (m, 2H), 3.46 (s, 1H), 3.04 (dd,  $J = 10.5, 4.4$  Hz, 1H), 2.57 (dd,  $J = 16.0, 4.8$  Hz, 1H), 2.35 (dd,  $J = 15.9, 11.8$  Hz, 2H), 2.08 – 1.88 (m, 1H), 1.86 – 1.70 (m, 3H), 1.70 – 1.54 (m, 1H), 1.50 – 1.30 (m, 3H), 1.01 – 0.87 (m, 1H);  $^{13}\text{C}$  NMR (100 MHz,  $\text{CDCl}_3$ )  $\delta$  144.8, 138.5, 129.0, 126.7, 120.8, 116.5, 115.5, 113.4, 58.8, 38.2, 34.9, 32.5, 30.8, 29.7, 27.5, 19.8; HPLC (OJ-H, elute: Hexanes/*i*-PrOH = 95/5, detector: 254 nm, flow rate: 0.8 mL/min), 30 °C,  $t_1 = 11.2$  min (maj),  $t_2 = 13.0$  min; HRMS (ESI)  $m/z$  Calculated for  $\text{C}_{16}\text{H}_{22}\text{N}$   $[\text{M}+\text{H}]^+$  228.1752, found 228.1741.

**(4R,4aS,9aR)-4-Benzyl-1,2,3,4,4a,9,9a,10-octahydroacridine (2f):** Pale solid, mp = 72-74 °C, 82% yield,  $R_f = 0.82$  (petroleum ether/EtOAc = 30:1), 67% ee,  $[\alpha]_D^{22} = -103.9$  ( $c$  1.03,  $\text{CHCl}_3$ );

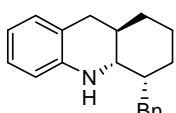

$^1\text{H}$  NMR (400 MHz,  $\text{CDCl}_3$ )  $\delta$  7.35 – 7.26 (m, 2H), 7.23 – 7.15 (m, 3H), 6.95 (dd,  $J = 15.1, 7.4$  Hz, 2H), 6.59 (dd,  $J = 10.5, 4.1$  Hz, 1H), 6.45 (d,  $J = 7.9$  Hz, 1H), 3.57 (s, 1H), 3.19 (dd,  $J = 10.5, 4.5$  Hz, 1H), 3.03 (dd,  $J = 14.0, 3.6$  Hz, 1H), 2.69 (dd,  $J = 16.0, 4.7$  Hz, 1H), 2.51 (ddd,  $J = 27.6, 14.9, 11.2$  Hz, 2H), 2.18 – 2.04 (m, 1H), 2.00 – 1.78 (m, 2H), 1.74 – 1.59 (m, 2H), 1.61 – 1.47 (m, 1H), 1.46 – 1.32 (m, 1H), 1.99-0.99 (m, 1H);  $^{13}\text{C}$  NMR (100 MHz,  $\text{CDCl}_3$ )  $\delta$  144.8, 142.4, 129.1, 129.0, 128.3, 126.8, 125.7, 120.8, 116.6, 113.5, 59.0, 40.8, 34.9, 32.6, 31.7, 30.9, 27.5, 20.0; HPLC (AD-H, elute: Hexanes/*i*-PrOH = 98/2,

detector: 254 nm, flow rate: 0.8 mL/min), 30 °C,  $t_1 = 10.1$  min (maj),  $t_2 = 13.0$  min; HRMS (ESI)  $m/z$  Calculated for  $C_{20}H_{24}N$   $[M+H]^+$  278.1909, found 278.1906.

**(4S,4aS,9aR)-4-Ethyl-7-methoxy-1,2,3,4,4a,9,9a,10-octahydroacridine (2g):** Pale solid, mp = 71-72 °C, 60% yield,  $R_f = 0.67$  (petroleum ether/EtOAc = 30:1), 87% ee,  $[\alpha]_D^{29} = -45.5$  (c 1.03,  $CHCl_3$ );  $^1H$  NMR (400 MHz,  $CDCl_3$ )  $\delta$  6.60 (d,  $J = 8.6$  Hz, 1H), 6.55 (s, 1H), 6.44 (d,  $J = 8.5$  Hz, 1H), 3.73 (s, 3H), 3.29 (s, 1H), 3.03 (d,  $J = 10.6$  Hz, 1H), 2.69 – 2.59 (m, 1H), 2.51 – 2.36 (m, 1H), 1.86 (d,  $J = 12.7$  Hz, 2H), 1.68 (dd,  $J = 13.0, 7.4$  Hz, 3H), 1.59 – 1.21 (m, 4H), 0.97 (dt,  $J = 14.2, 8.8$  Hz, 4H);  $^{13}C$  NMR (100 MHz,  $CDCl_3$ )  $\delta$  151.5, 139.4, 122.2, 114.8, 114.5, 113.05, 59.6, 56.1, 40.7, 35.4, 32.9, 31.1, 27.4, 20.0, 17.5, 13.0; HPLC (OJ-H, elute: Hexanes/*i*-PrOH = 95/5, detector: 254 nm, flow rate: 0.8 mL/min), 30 °C,  $t_1 = 11.7$  min (maj),  $t_2 = 15.8$  min; HRMS (ESI)  $m/z$  Calculated for  $C_{16}H_{24}NO$   $[M+H]^+$  246.1858, found 246.1861.

**(4S,4aS,9aR)-4-Ethyl-7-fluoro-1,2,3,4,4a,9,9a,10-octahydroacridine (2h):** Pale oil, 97% yield,  $R_f = 0.69$  (petroleum ether/EtOAc = 30:1), 88% ee,  $[\alpha]_D^{29} = -53.5$  (c 0.80,  $CHCl_3$ );  $^1H$  NMR (400 MHz,  $CDCl_3$ )  $\delta$  6.64 (ddd,  $J = 9.1, 7.5, 4.3$  Hz, 2H), 6.37 (dd,  $J = 8.5, 4.8$  Hz, 1H), 3.41 (brs, 1H), 3.02 (dd,  $J = 10.6, 4.2$  Hz, 1H), 2.60 (dd,  $J = 16.3, 5.0$  Hz, 1H), 2.38 (dd,  $J = 16.0, 11.8$  Hz, 1H), 1.84 (dd,  $J = 12.9, 2.6$  Hz, 2H), 1.71 – 1.59 (m, 3H), 1.54 – 1.38 (m, 2H), 1.37 – 1.23 (m, 2H), 1.03 – 0.87 (m, 4H);  $^{13}C$  NMR (100 MHz,  $CDCl_3$ )  $\delta$  155.1 (d,  $J = 233$  Hz), 141.2, 122.0 (d,  $J = 6.6$  Hz), 115.1 (d,  $J = 21$  Hz), 113.79 (d,  $J = 7.6$  Hz), 113.1 (d,  $J = 22$  Hz), 59.3, 40.5, 35.0, 32.5, 30.6, 27.1, 19.8, 17.3, 12.8;  $^{19}F$  NMR (376 MHz,  $CDCl_3$ )  $\delta$  -129.2; HPLC (OJ-H, elute: Hexanes/*i*-PrOH = 95/5, detector: 254 nm, flow rate: 0.8 mL/min), 30 °C,  $t_1 = 6.9$  min (maj),  $t_2 = 7.7$  min; HRMS (ESI)  $m/z$  Calculated for  $C_{15}H_{21}NF$   $[M+H]^+$  234.1658, found 234.1668.

**(4R,4aR,9aR)-4-Phenyl-1,2,3,4,4a,9,9a,10-octahydroacridine (2i):** Pale oil, 40% yield,  $R_f = 0.60$  (petroleum ether/EtOAc = 30:1), 46% ee,  $[\alpha]_D^{29} = +32.4$  (c 0.16,  $CHCl_3$ );  $^1H$  NMR (400 MHz,  $CDCl_3$ )  $\delta$  7.44 (d,  $J = 7.4$  Hz, 2H), 7.31 – 7.23 (m, 2H), 7.20 (dt,  $J = 9.4, 4.3$  Hz, 1H), 6.92 (dd,  $J = 16.9, 8.0$  Hz, 2H), 6.57 (td,  $J = 7.4, 1.0$  Hz, 1H), 6.34 (d,  $J = 8.0$  Hz, 1H), 3.48 (brs, 1H), 3.43 – 3.15 (m, 2H), 2.75 (dd,  $J = 15.9, 4.6$  Hz, 1H), 2.48 (dd,  $J = 15.9, 11.5$  Hz, 1H), 2.34 – 2.20 (m, 1H), 2.08 – 1.98 (m, 2H), 1.98 – 1.85 (m, 1H), 1.63 – 1.49 (m, 3H), 1.17 – 1.04 (m, 1H);  $^{13}C$  NMR (100 MHz,  $CDCl_3$ )  $\delta$  144.5, 142.3, 130.1, 129.1, 128.2, 126.7, 126.1, 121.1, 116.6, 113.9, 58.6, 43.5, 35.8, 32.8, 32.2, 31.4, 20.7; HPLC (OJ-H, elute: Hexanes/*i*-PrOH = 90/10, detector: 254 nm, flow rate: 1.0 mL/min), 30 °C,  $t_1 = 9.4$  min (maj),  $t_2 = 13.2$  min; HRMS (ESI)  $m/z$  Calculated for  $C_{19}H_{22}N$   $[M+H]^+$  264.1752, found 264.1745.

**(4R,4aS,9aS)-4-phenyl-1,2,3,4,4a,9,9a,10-octahydroacridine (2i'):** Pale oil, 9% yield,  $R_f = 0.59$  (petroleum ether/EtOAc = 30:1);  $^1H$  NMR (400 MHz,  $CDCl_3$ )  $\delta$  7.32 (t,  $J = 7.3$  Hz, 2H), 7.23 (d,  $J = 7.3$  Hz, 1H), 7.16 (d,  $J = 7.2$  Hz, 2H), 6.98 (d,  $J = 7.3$  Hz, 1H), 6.92 (t,  $J = 7.5$  Hz, 1H), 6.60 (t,  $J = 7.3$  Hz, 1H), 6.25 (d,  $J = 7.9$  Hz, 1H), 3.72 (s, 1H), 3.32 (dd,  $J = 10.7, 4.1$  Hz, 1H), 3.09 (dd,  $J = 15.1, 12.1$  Hz, 1H), 2.77 (dd,  $J = 15.3, 7.2$  Hz, 1H), 2.63 – 2.46 (m, 2H), 1.90 – 1.84 (m, 2H), 1.65 (qd,  $J = 12.1, 6.3$  Hz, 3H), 1.27 (s, 1H);  $^{13}C$  NMR (100 MHz,  $CDCl_3$ )  $\delta$  144.1, 143.1, 129.6, 128.7, 128.1, 126.9, 126.7, 120.4, 116.8, 114.1, 57.5, 46.6, 33.3, 31.8, 30.6, 27.7, 20.8; HRMS (ESI)  $m/z$  Calculated for  $C_{19}H_{22}N$   $[M+H]^+$  264.1752, found 264.1776.

**(4-Bromophenyl)((4*S*,4*aS*,9*aR*)-4-ethyl-2,3,4,4*a*,9,9*a*-hexahydroacridin-10(1*H*)-yl)methanone (**5b**)** Pale solid, mp = 154-156 °C, 94% yield,  $R_f$  = 0.21 (petroleum ether/EtOAc = 30:1), 98% ee,  $[\alpha]_D^{29} = +355.4$  ( $c$  1.77, CHCl<sub>3</sub>); <sup>1</sup>H NMR (400 MHz, CDCl<sub>3</sub>) δ 7.28 (d,  $J$  = 7.9 Hz, 2H), 7.11 (d,  $J$  = 6.8 Hz, 1H), 6.96 (dd,  $J$  = 34.5, 7.3 Hz, 3H), 6.83 (d,  $J$  = 7.4 Hz, 1H), 6.47 (d,  $J$  = 7.6 Hz, 1H), 4.05 (d,  $J$  = 11.4 Hz, 1H), 2.82 (s, 1H), 2.57 – 2.33 (m, 2H), 1.91 (s, 1H), 1.80 (d,  $J$  = 13.4 Hz, 1H), 1.59 (s, 2H), 1.49 – 1.33 (m, 2H), 1.17 (s, 2H), 0.89 (t,  $J$  = 7.4 Hz, 3H); <sup>13</sup>C NMR (100 MHz, CDCl<sub>3</sub>) δ 169.9, 139.2, 136.3, 136.2, 131.1, 130.1, 126.9, 126.3, 125.3, 123.7, 67.6, 40.1, 39.1, 35.2, 33.5, 27.2, 21.2, 18.9, 12.9; HPLC (AD-H, elute: Hexanes/*i*-PrOH = 95/5, detector: 254 nm, flow rate: 1.0 mL/min), 30 °C,  $t_1$  = 12.0 min (maj),  $t_2$  = 20.1 min; HRMS (ESI)  $m/z$  Calculated for C<sub>22</sub>H<sub>24</sub>NOBrNa [M+Na]<sup>+</sup> 420.0939, found 420.0940.

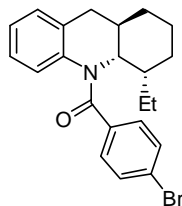

## 5. The Determination of the Absolute Configuration of **2b**

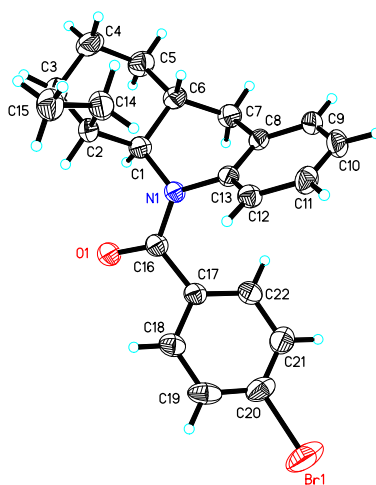

A mixture of 4-bromobenzoyl chloride (88 mg, 0.40 mmol), Et<sub>3</sub>N (56  $\mu$ L, 0.40 mmol) and 4-Ethyl-1,2,3,4,4*a*,9,9*a*,10-octahydroacridine **2b** (82 mg, 0.38 mmol) dissolved in 5 mL CH<sub>2</sub>Cl<sub>2</sub> was stirred for 2 h. After concentrating *in vacuo*, the resulting precipitate was directly purified by column chromatography on silica gel using hexane/EtOAc (30:1) to give the corresponding *N*-4-bromobenzoyl derivative **5b**. The product was recrystallized from DCM/hexane, and ee up to >98%.

CCDC 994490 contains the structure and supplementary crystallographic data for the crystal structure of (4-bromophenyl) ((4*S*,4*aS*,9*aR*)-4-ethyl-2,3,4,4*a*,9,9*a*-hexahydroacridin-10(1*H*)-yl) methanone **5b**. These data can be obtained free of charge via [www.ccdc.com.ac.uk/data\\_request/cif](http://www.ccdc.com.ac.uk/data_request/cif) from the Cambridge Crystallographic Data Centre.



## 6.1 Copy of NMR for 4-Substituted-1,2,3,4-tetrahydroacridines

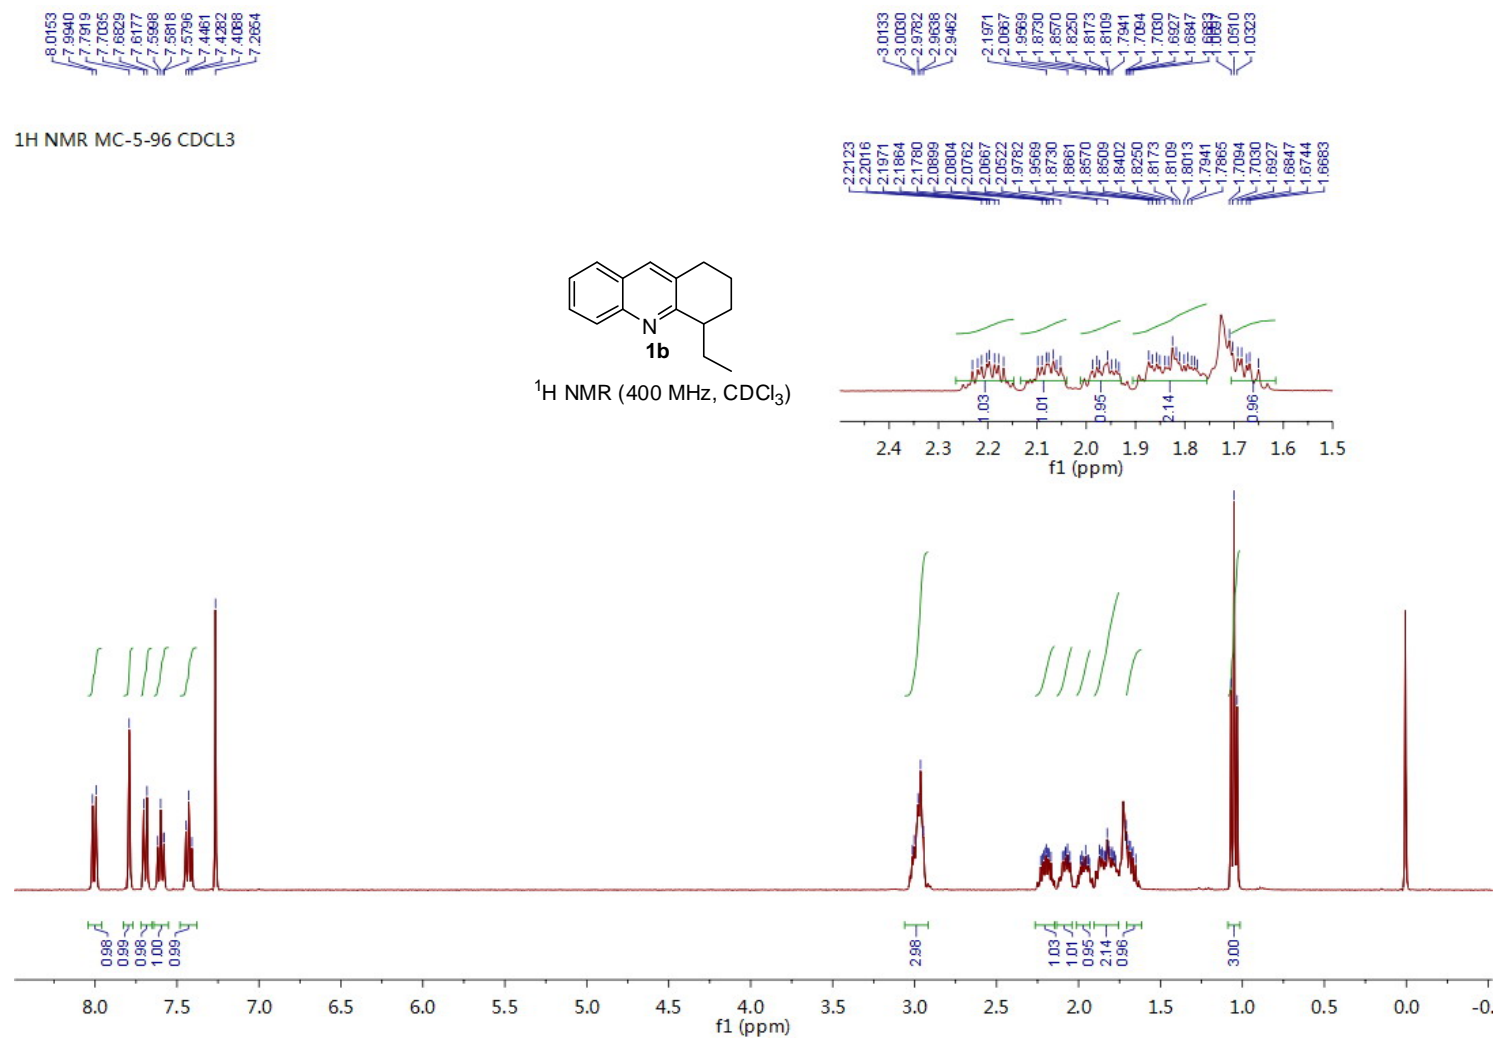

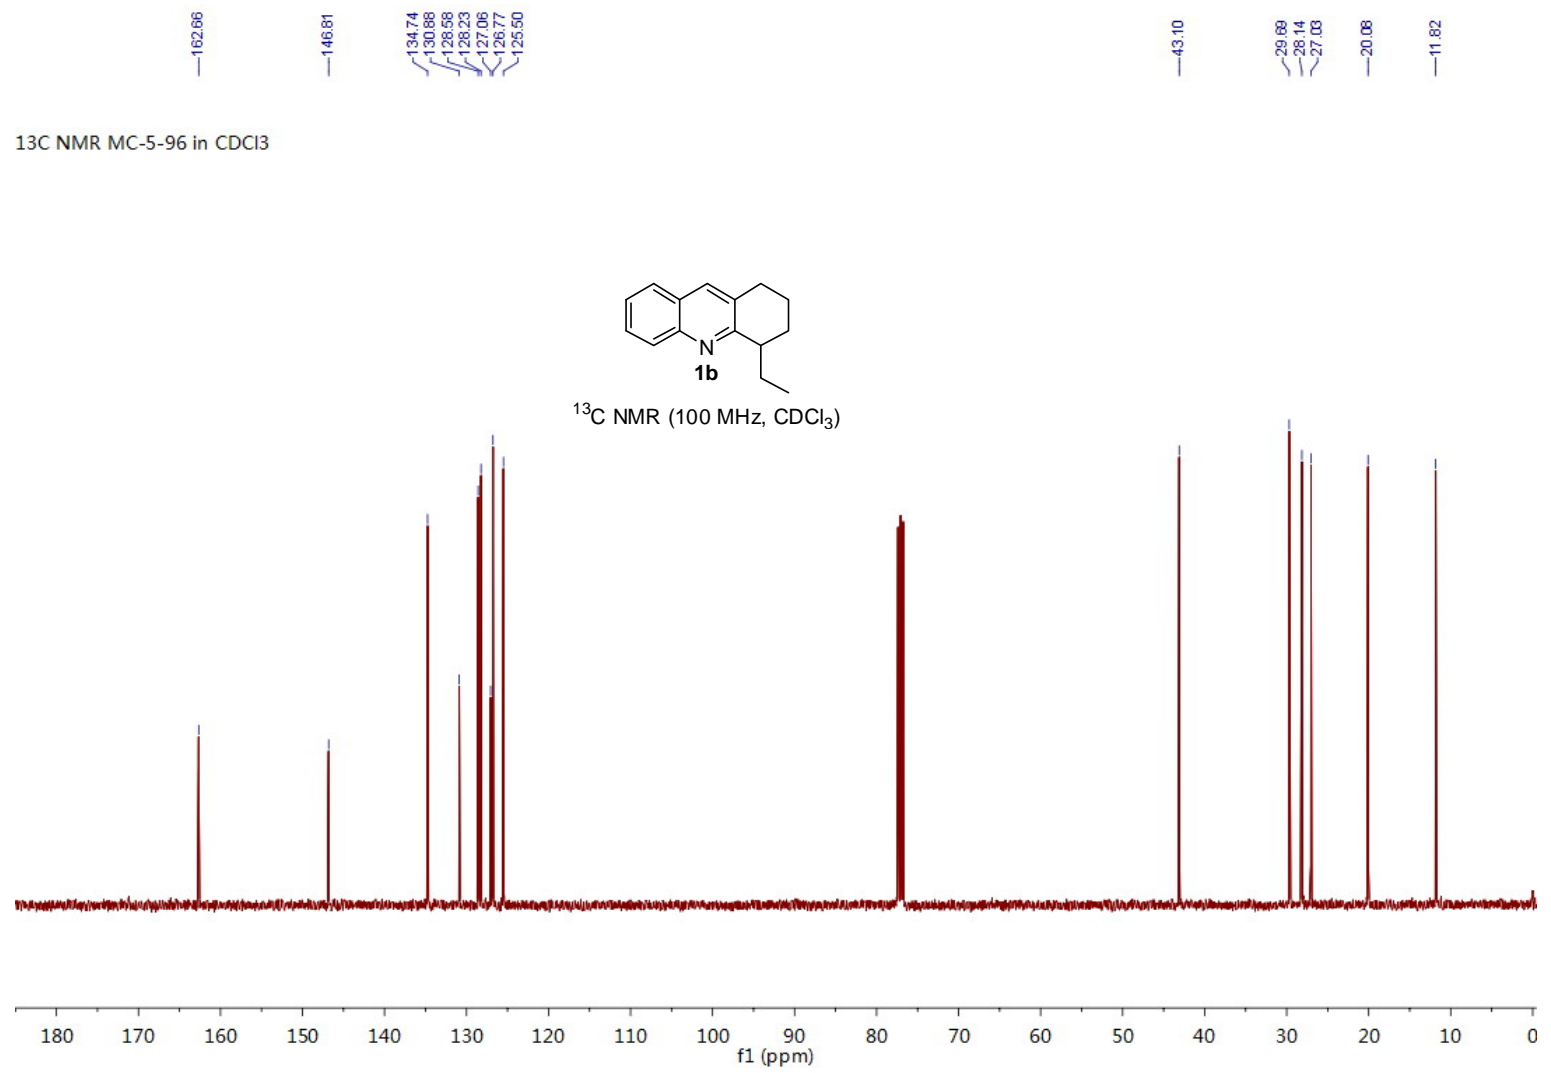

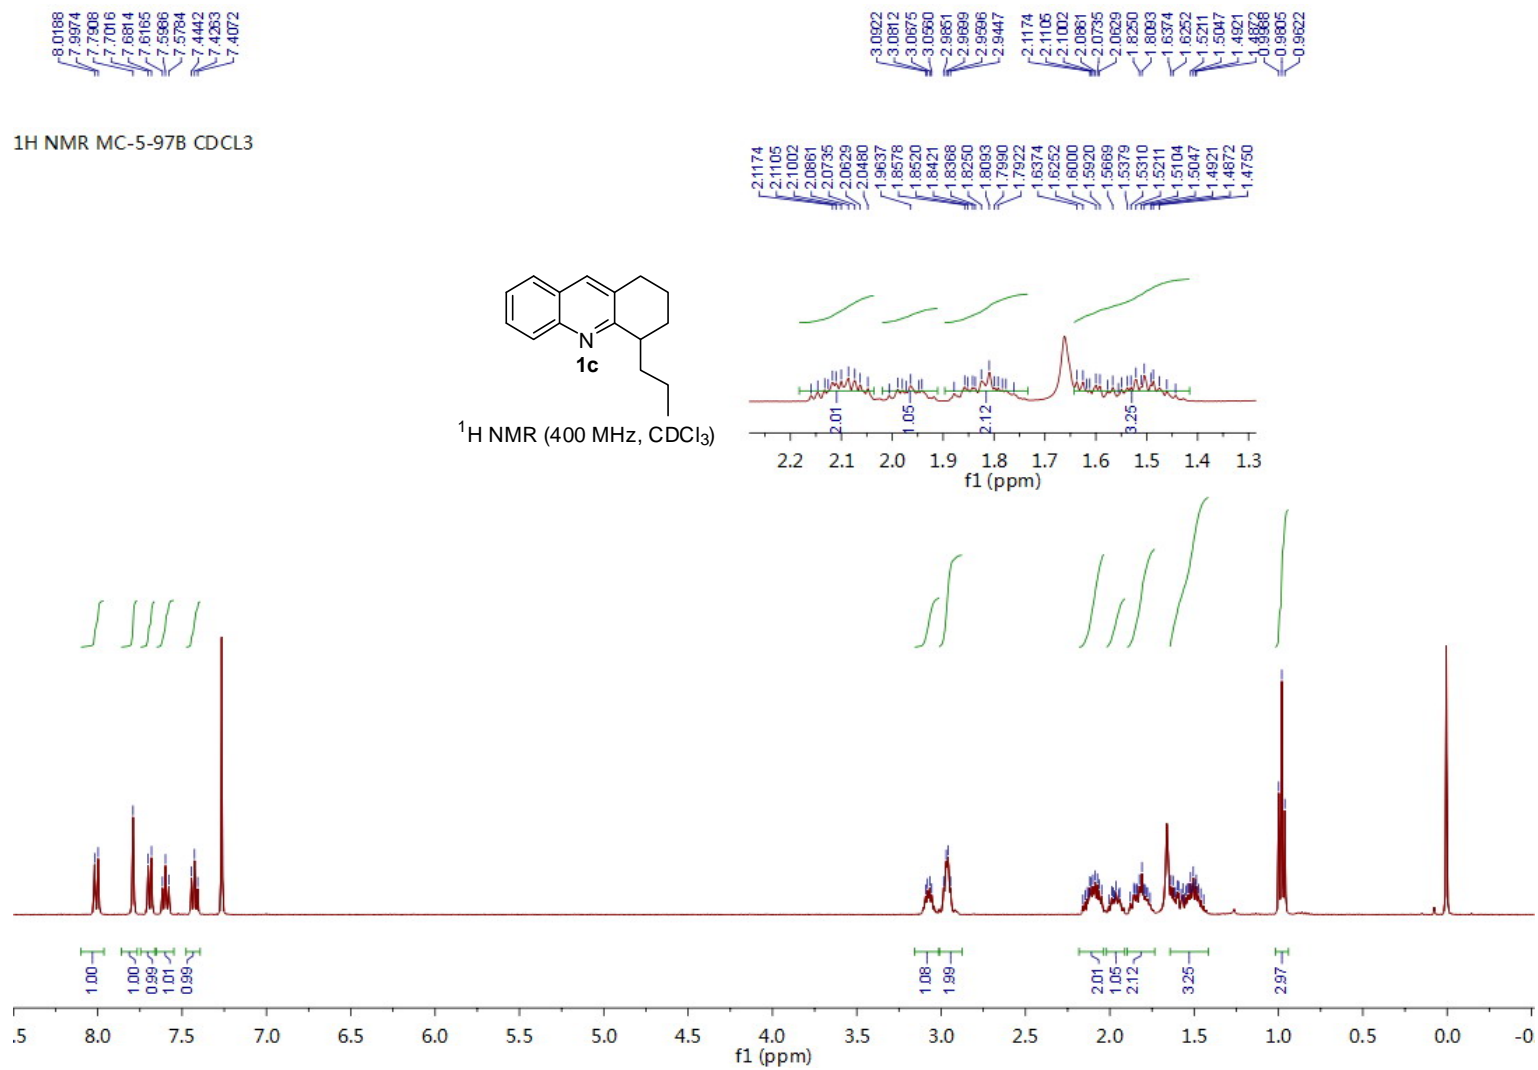

162.84

146.82

134.73

130.79

128.61

128.20

127.06

126.75

125.47

41.61

37.65

29.63

27.56

20.58

20.01

14.34

$^{13}\text{C}$  NMR MC-5-97B in  $\text{CDCl}_3$

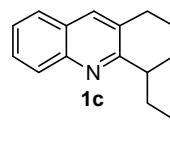

$^{13}\text{C}$  NMR (100 MHz,  $\text{CDCl}_3$ )

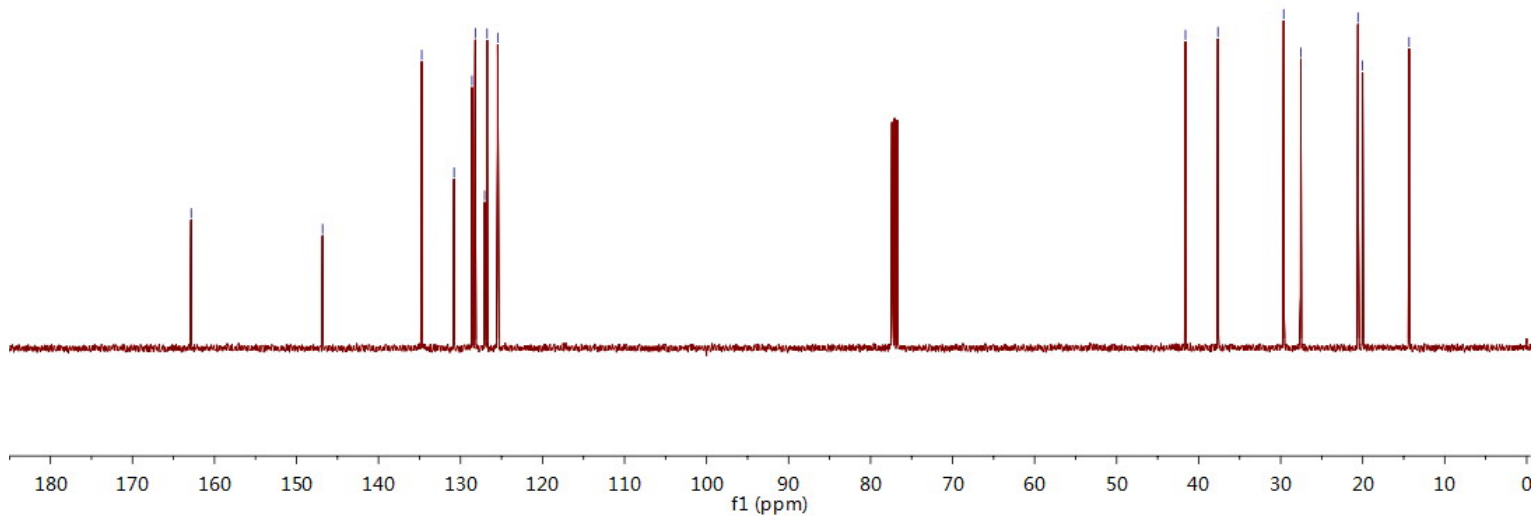

8.0158  
7.9947  
7.7839  
7.6946  
7.6757  
7.6118  
7.6085  
7.5947  
7.5911  
7.5874  
7.5736  
7.5703  
7.4392  
7.4367  
7.4193  
7.4019  
7.3995  
3.0751  
3.0641  
3.0600  
3.0393  
2.9796  
2.9645  
2.9538  
2.9388  
2.1422  
2.1381  
2.1294  
2.1251  
2.1188  
2.1055  
2.0981  
2.0867  
2.0848  
2.0820  
2.0722  
2.0673  
2.0592  
2.0505  
2.0435  
1.9881  
1.9757  
1.9674  
1.9583  
1.9546  
1.9460  
1.9360  
1.8794  
1.8602  
1.8538  
1.8443  
1.8385  
1.8272  
1.8226  
1.8168  
1.8107  
1.8055  
1.7945  
1.7871  
1.7801  
1.7725  
1.7676  
1.6668  
1.6616  
1.6481  
1.6402  
1.6279  
1.6234  
1.6142  
1.5904  
1.4883  
1.4736  
1.4681  
1.4553  
1.4400  
1.4348  
1.4281  
1.4220  
1.4049  
1.3875  
1.3731  
1.3554  
1.3428  
1.3370  
0.9441  
0.9281  
0.9083

<sup>1</sup>H NMR MC-5-100B in CDCl<sub>3</sub>

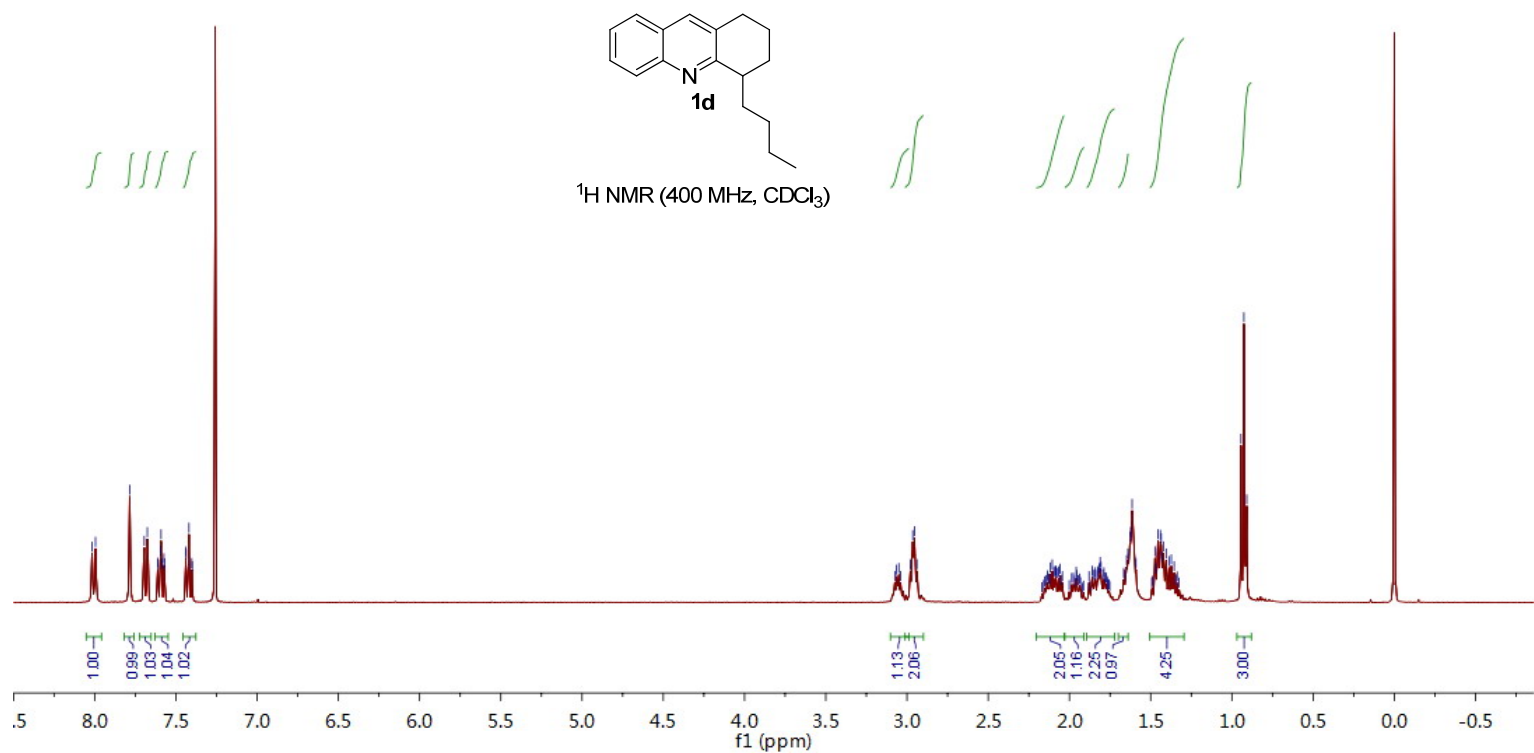

—163.01  
—146.89  
135.01  
130.97  
128.70  
128.43  
127.21  
126.94  
125.67

—41.91  
35.37  
29.86  
29.80  
27.64  
23.22  
20.12  
14.41

<sup>13</sup>C NMR MC-5-100B in CDCl<sub>3</sub>

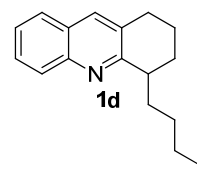

<sup>13</sup>C NMR (100 MHz, CDCl<sub>3</sub>)

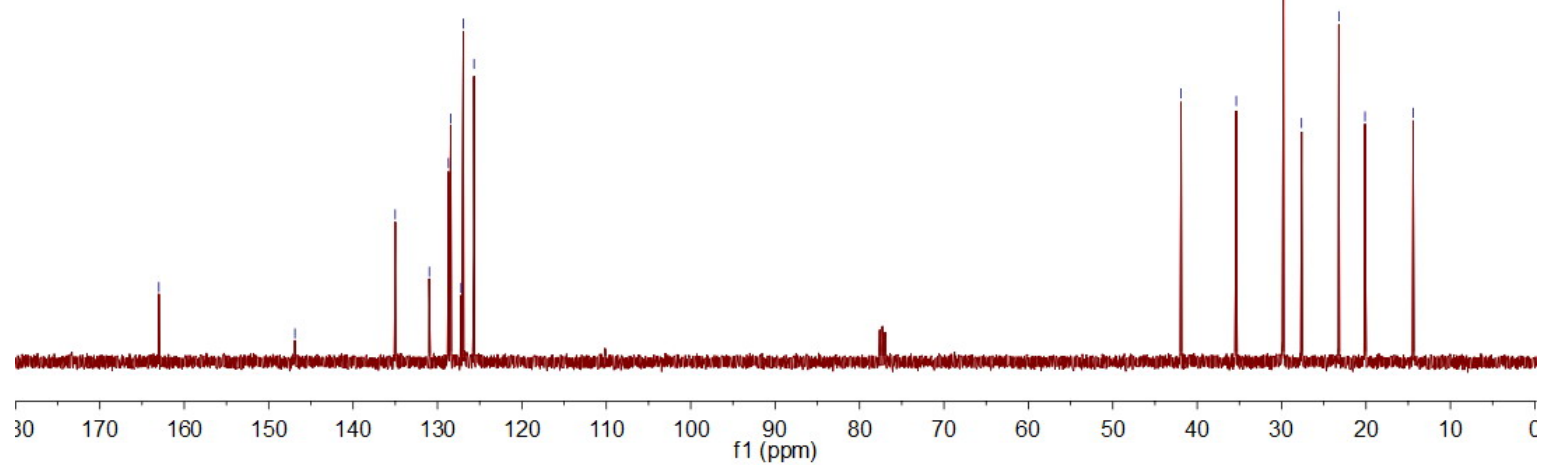



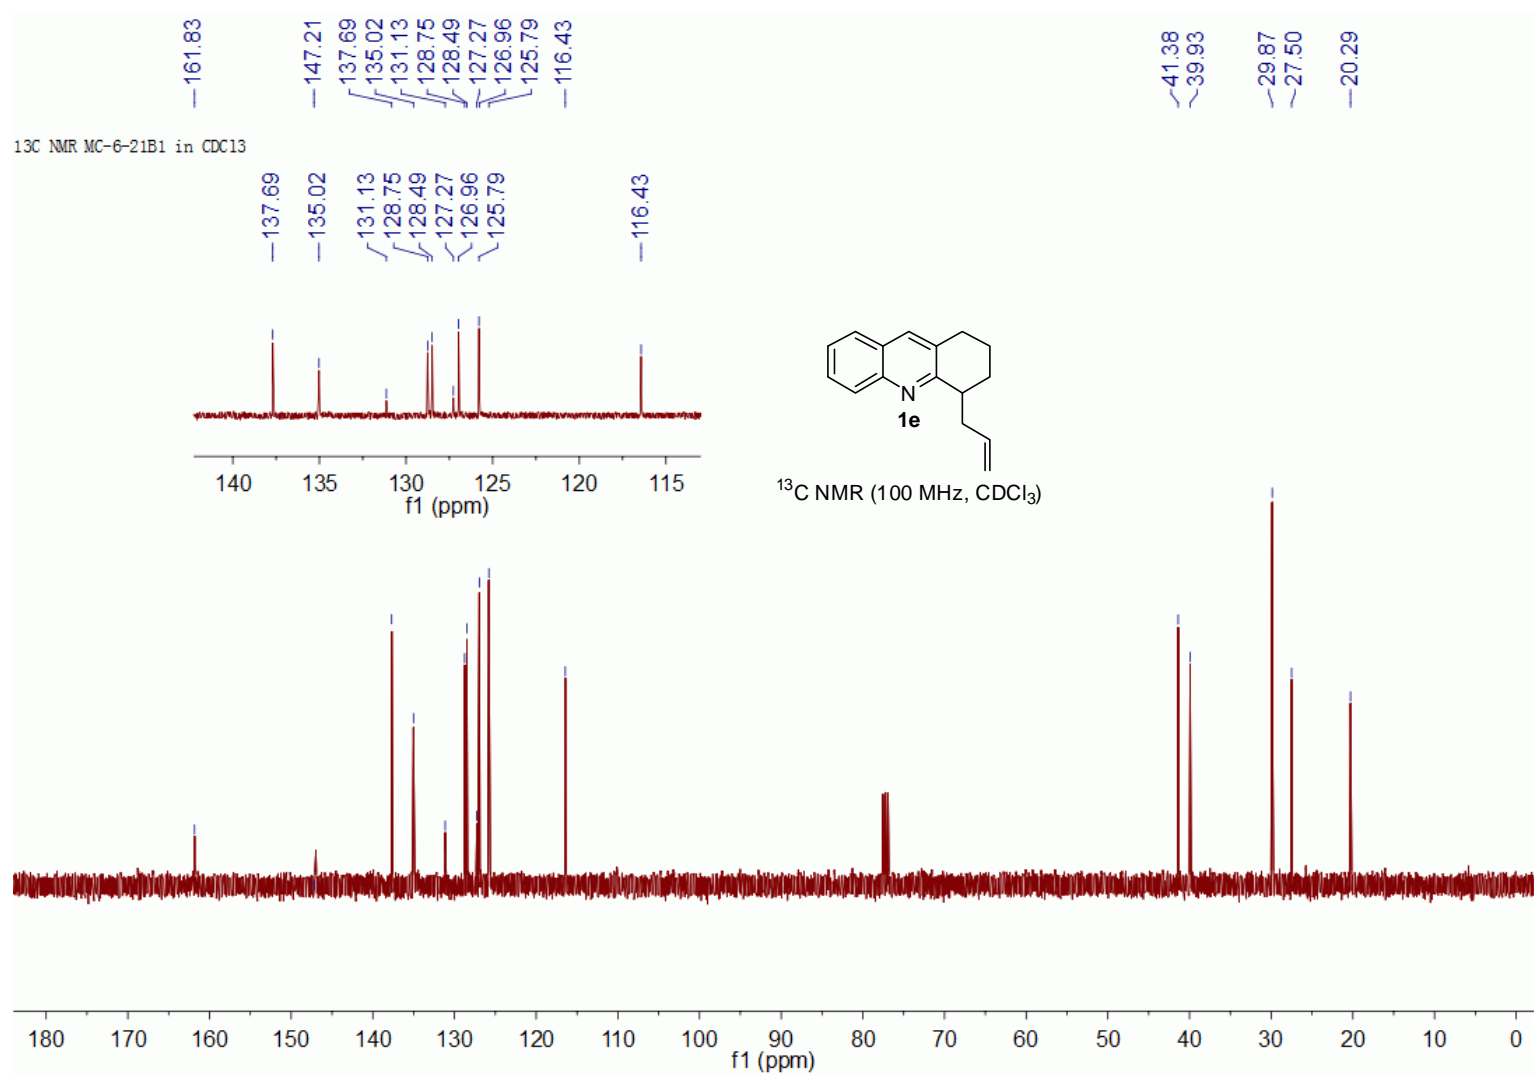





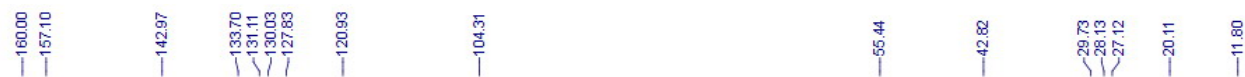

$^{13}\text{C}$  NMR MC-7-24A in  $\text{CDCl}_3$

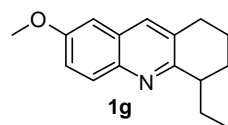

$^{13}\text{C}$  NMR (100 MHz,  $\text{CDCl}_3$ )

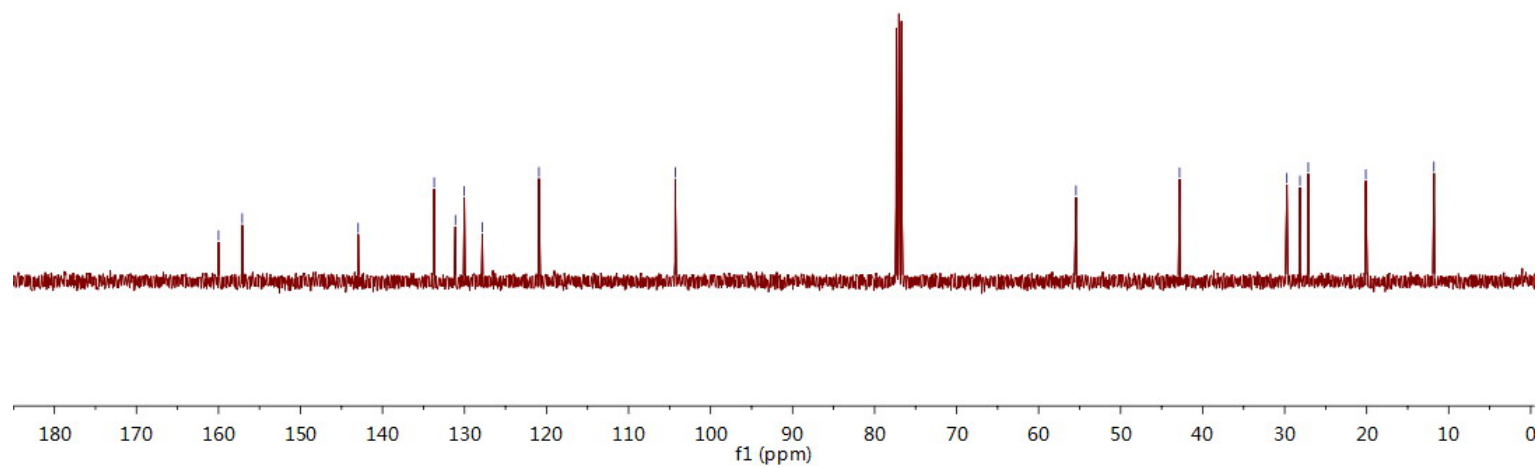

7.9632  
7.9755  
7.9578  
7.9728  
7.9305  
7.9281  
7.2753  
7.2720  
7.2536

2.9264  
2.1996  
2.1831  
2.1657  
2.0747  
2.0527  
1.9369  
1.9301  
1.9152  
1.8349  
1.8254  
1.8187  
1.7881  
1.7892  
1.6876  
1.6896  
1.6522  
1.0362  
1.0195

<sup>1</sup>H NMR MC-7-26A1 in CDCl<sub>3</sub>

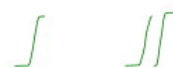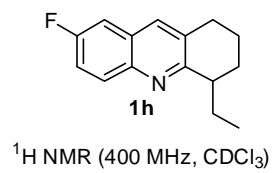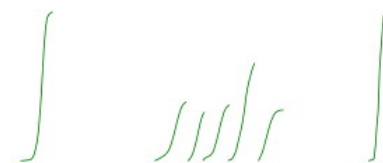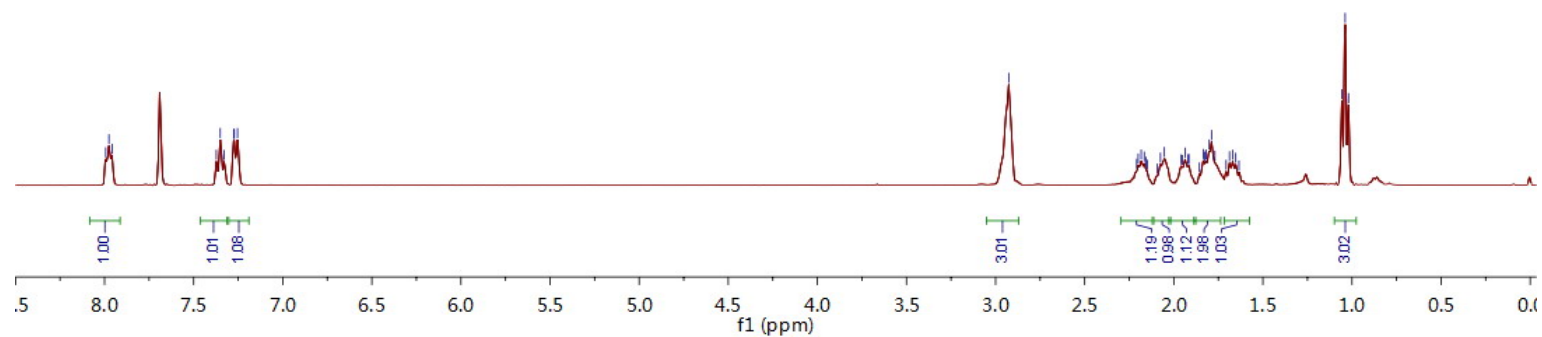

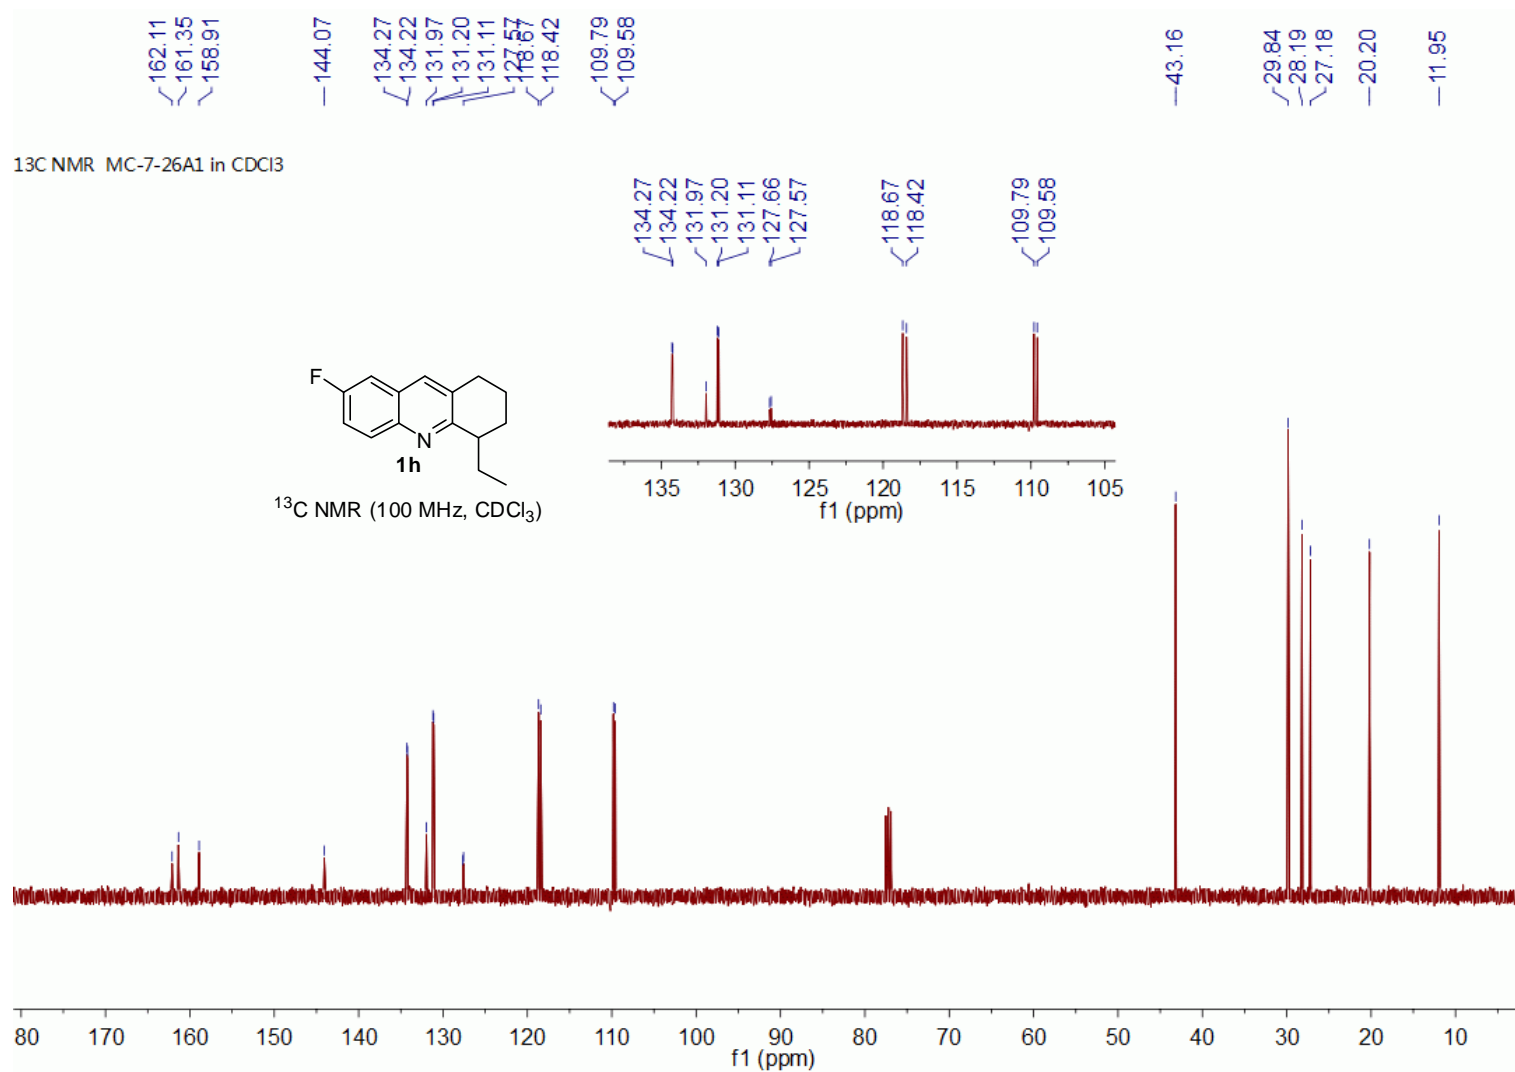

<sup>19</sup>F NMR MC-7-26A1 in CDCl<sub>3</sub>

—115.34

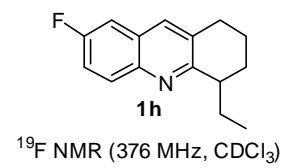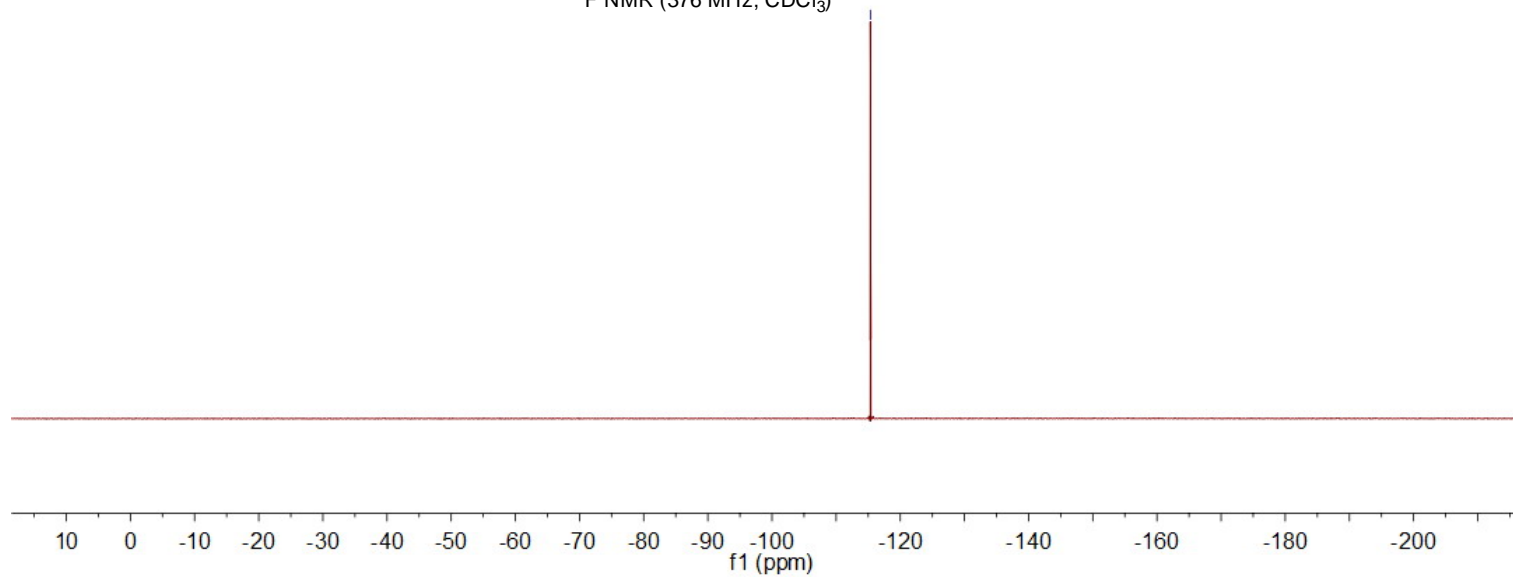

7.5348  
7.9146  
7.8702  
7.7088  
7.6885  
7.5554  
7.5370  
7.5187  
7.4286  
7.4103  
7.3921  
7.2293  
7.2104  
7.1932  
7.1471  
7.1307  
7.1140  
6.9735  
6.9558

4.5455  
4.5336

3.1025  
3.0883  
3.0735  
3.0604  
3.0463  
3.0318  
3.0184  
3.0017  
2.9812  
2.9652  
2.9400

2.2968  
2.2896  
2.2790  
2.1529  
2.1387  
1.8843  
1.8707  
1.8634  
1.8520  
1.8034  
1.7884  
1.7805  
1.7729  
1.7651  
1.7575  
1.7494  
1.7322

<sup>1</sup>H NMR MC-5-11 in CDCl<sub>3</sub>

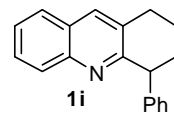

<sup>1</sup>H NMR (400 MHz, CDCl<sub>3</sub>)

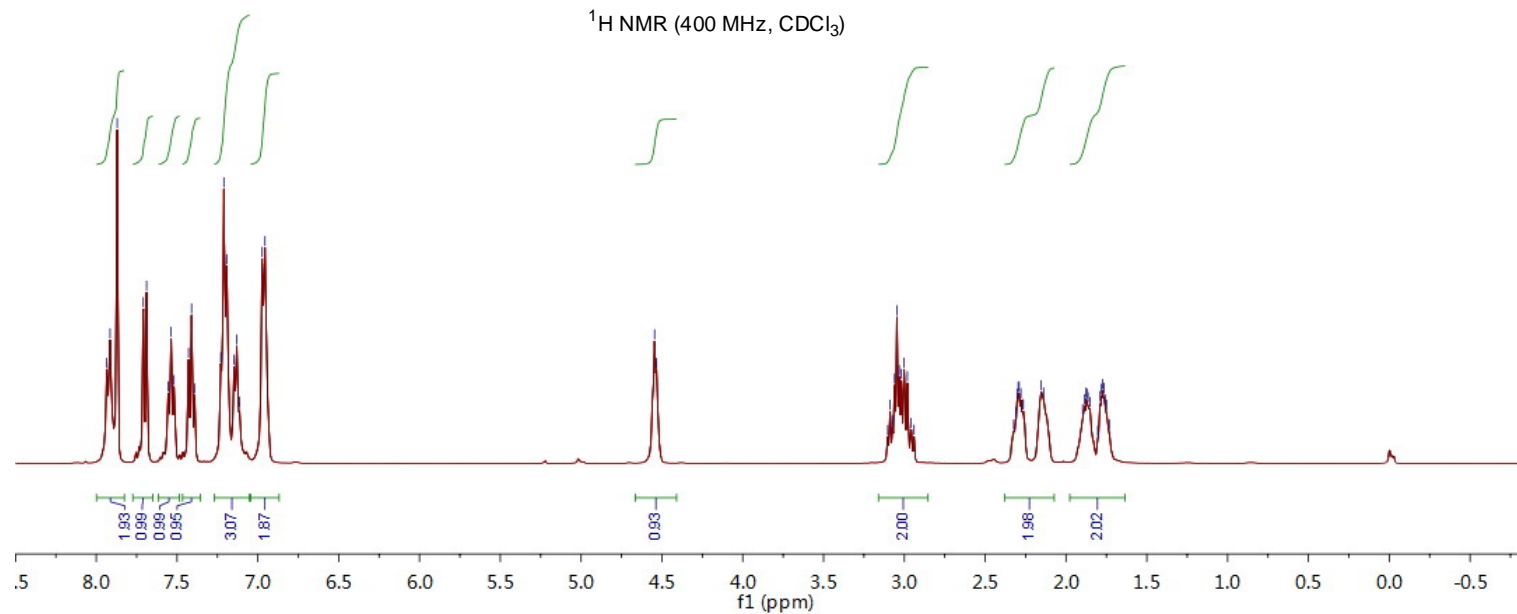

160.31  
147.12  
146.30  
135.20  
131.46  
129.05  
128.79  
128.39  
128.14  
127.36  
126.82  
125.90  
125.79  
48.32  
32.58  
29.29  
19.17

<sup>13</sup>C NMR MC-5-11 in CDCl<sub>3</sub>

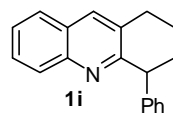

<sup>13</sup>C NMR (100 MHz, CDCl<sub>3</sub>)

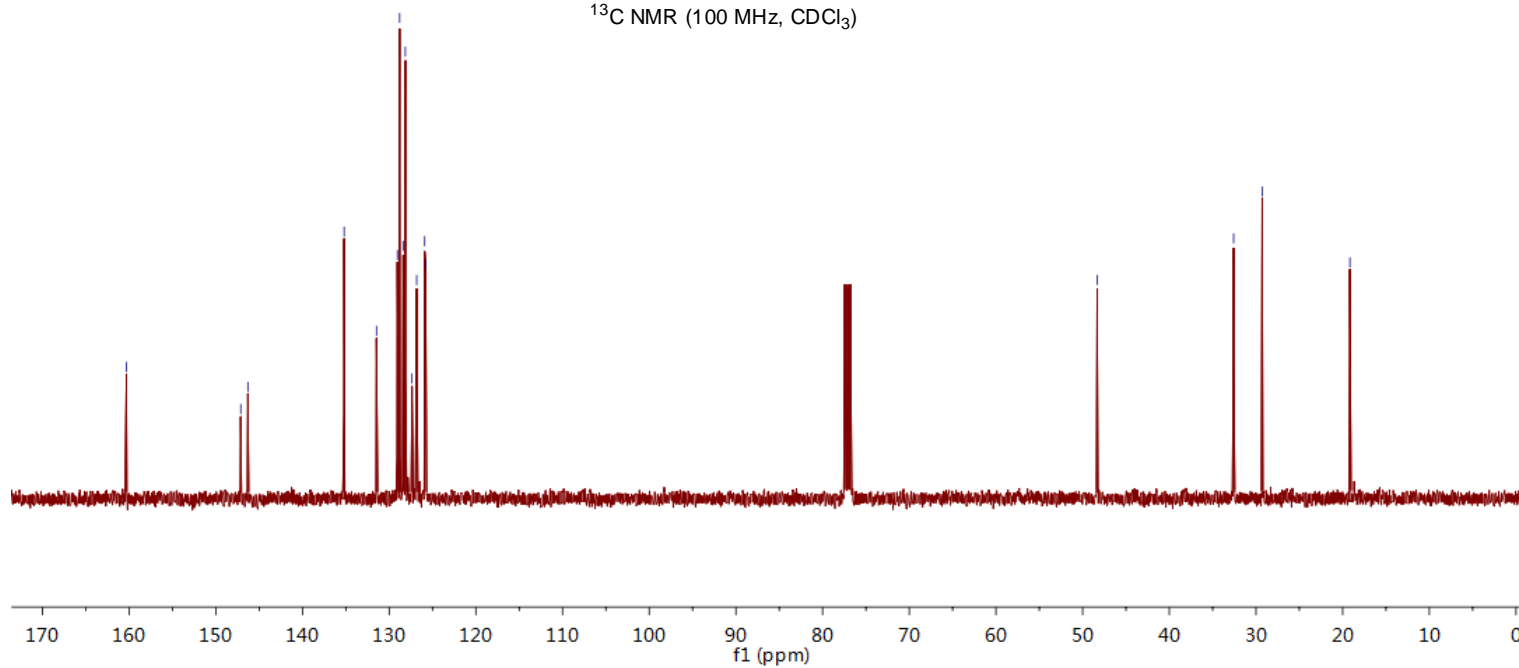

## 6.2 Copy of NMR for 4g

<sup>1</sup>H NMR MC-b-18 CDCl<sub>3</sub>

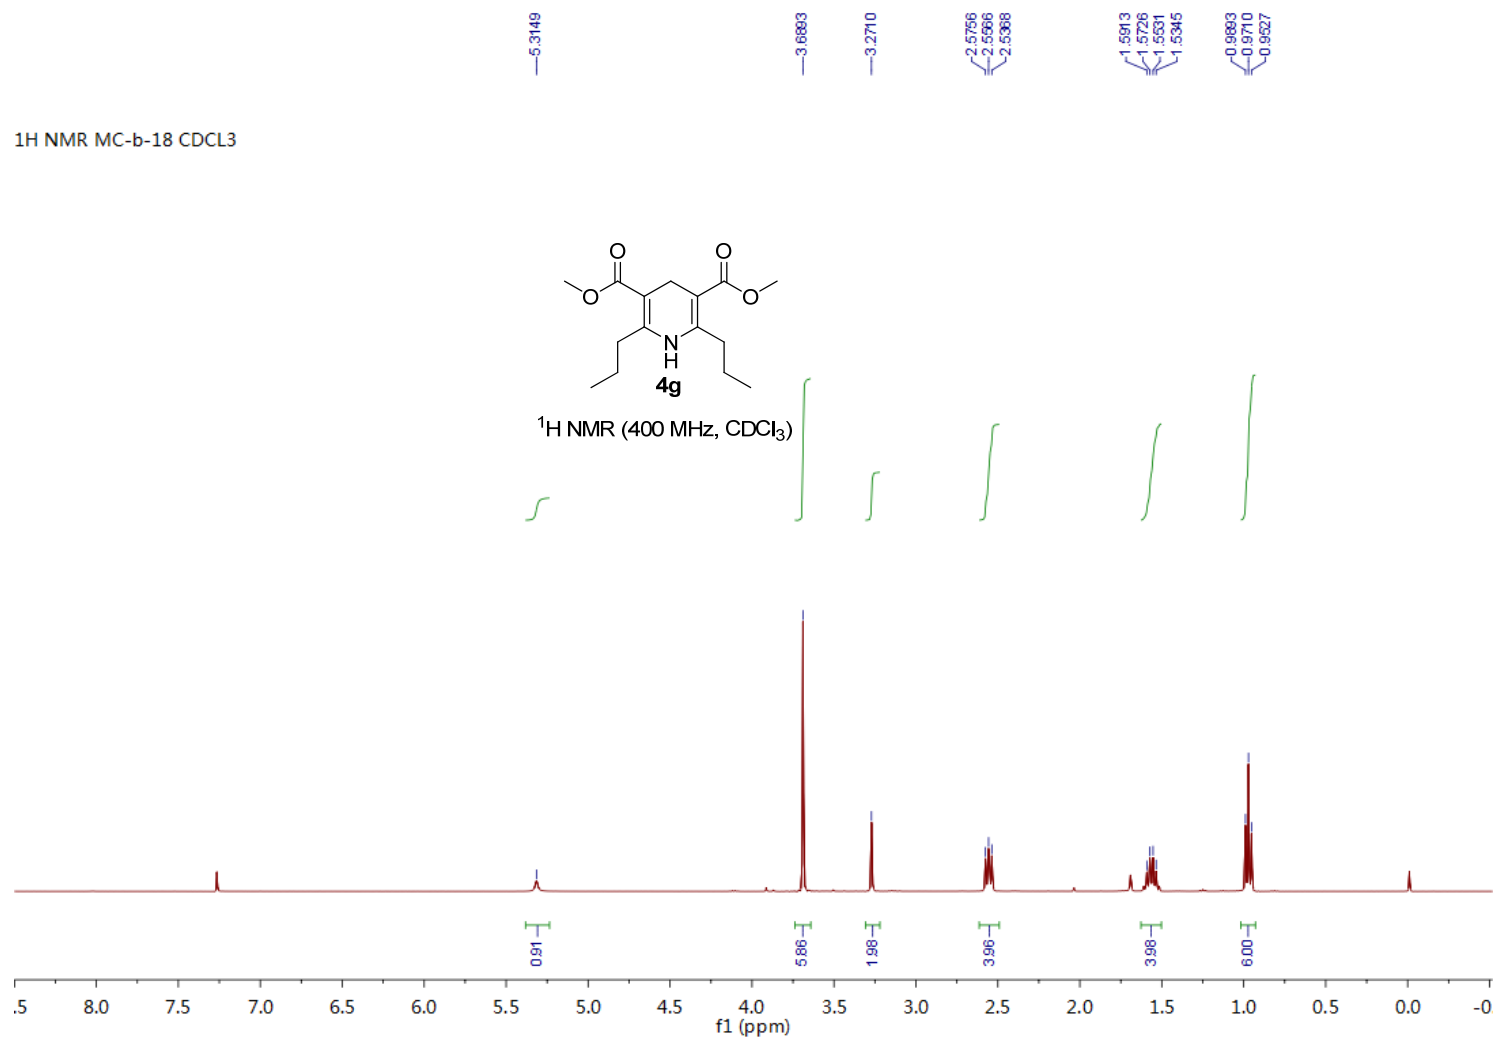



<sup>13</sup>C NMR MC-b-18 CDCl<sub>3</sub>

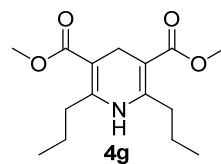

<sup>13</sup>C NMR (100 MHz, CDCl<sub>3</sub>)

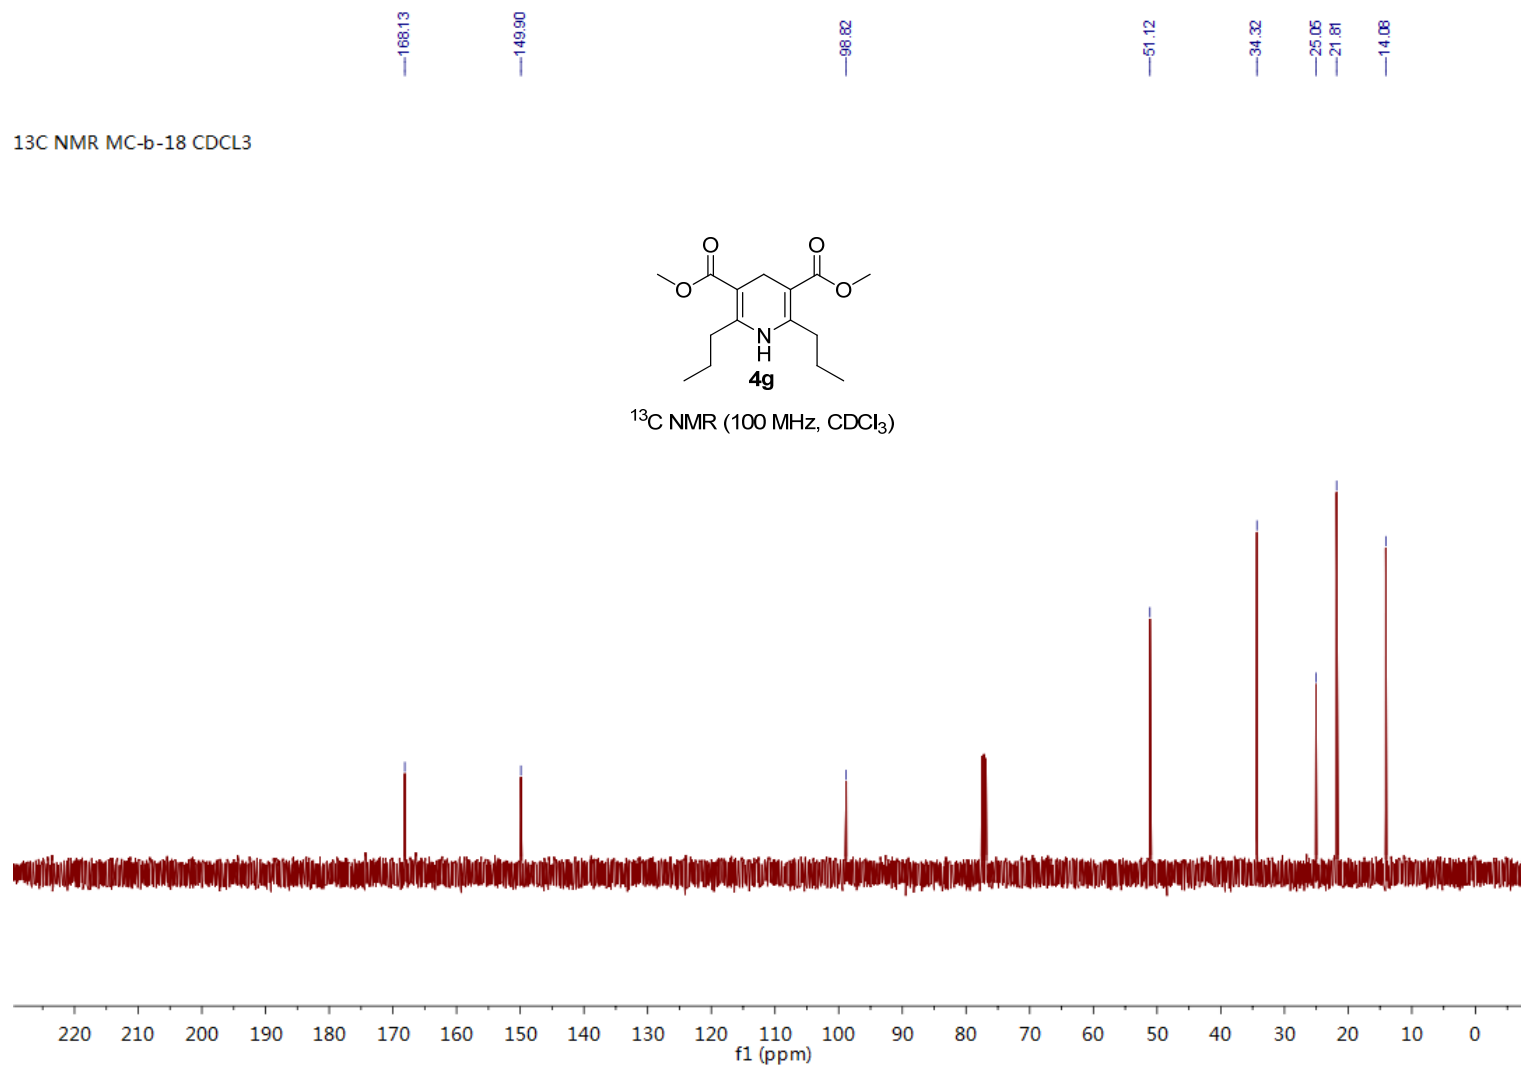

### 6.3 Copy of NMR for 1,2,3,4-tetrahydroquinolines

6.9843  
6.9453  
6.9229  
6.9027  
6.5759  
6.5576  
6.5362  
6.4726  
6.4528

3.4852  
3.0534  
3.0422  
3.0273  
3.0161  
2.6726  
2.6605  
2.6306  
2.6206  
2.4600  
2.4306  
2.0065  
1.9969  
1.8845  
1.8292  
1.6441  
1.6353  
1.6136  
1.6075  
1.5816  
1.5522  
1.5488  
0.9705

<sup>1</sup>H NMR MC-6-10A in CDCl<sub>3</sub>

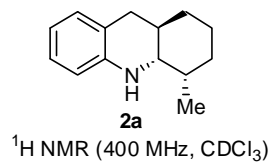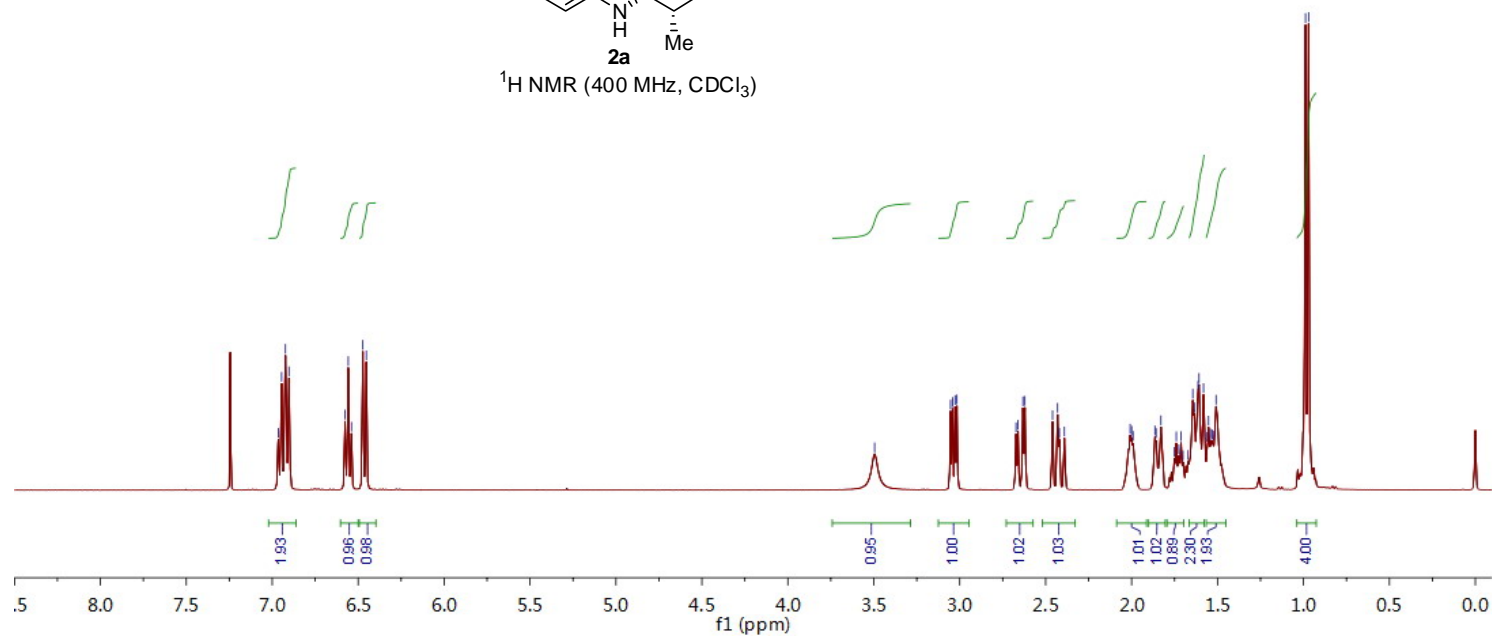

<sup>13</sup>C NMR MC-6-10A in CDCl<sub>3</sub>

—145.01  
—129.01  
—126.88  
—120.89  
—116.42  
—113.30  
  
—56.82  
  
34.90  
32.59  
32.45  
31.36  
30.07  
  
—19.85  
—11.85

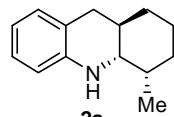

<sup>13</sup>C NMR (100 MHz, CDCl<sub>3</sub>)

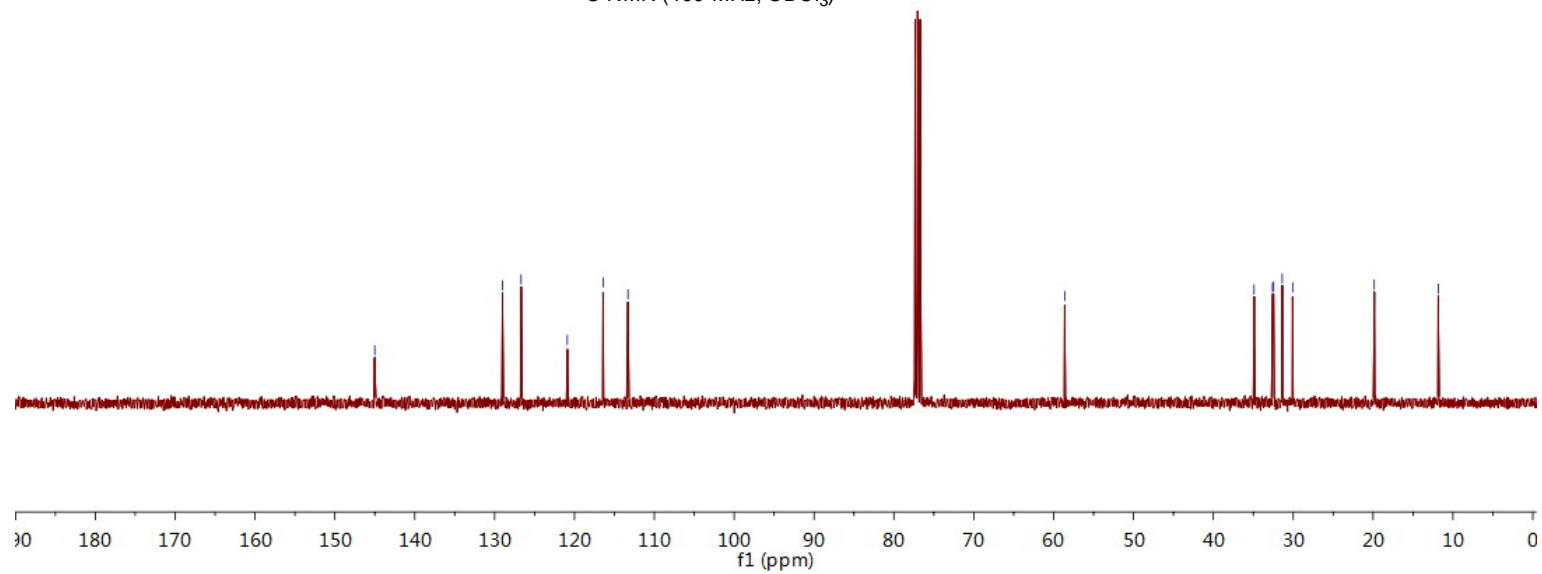



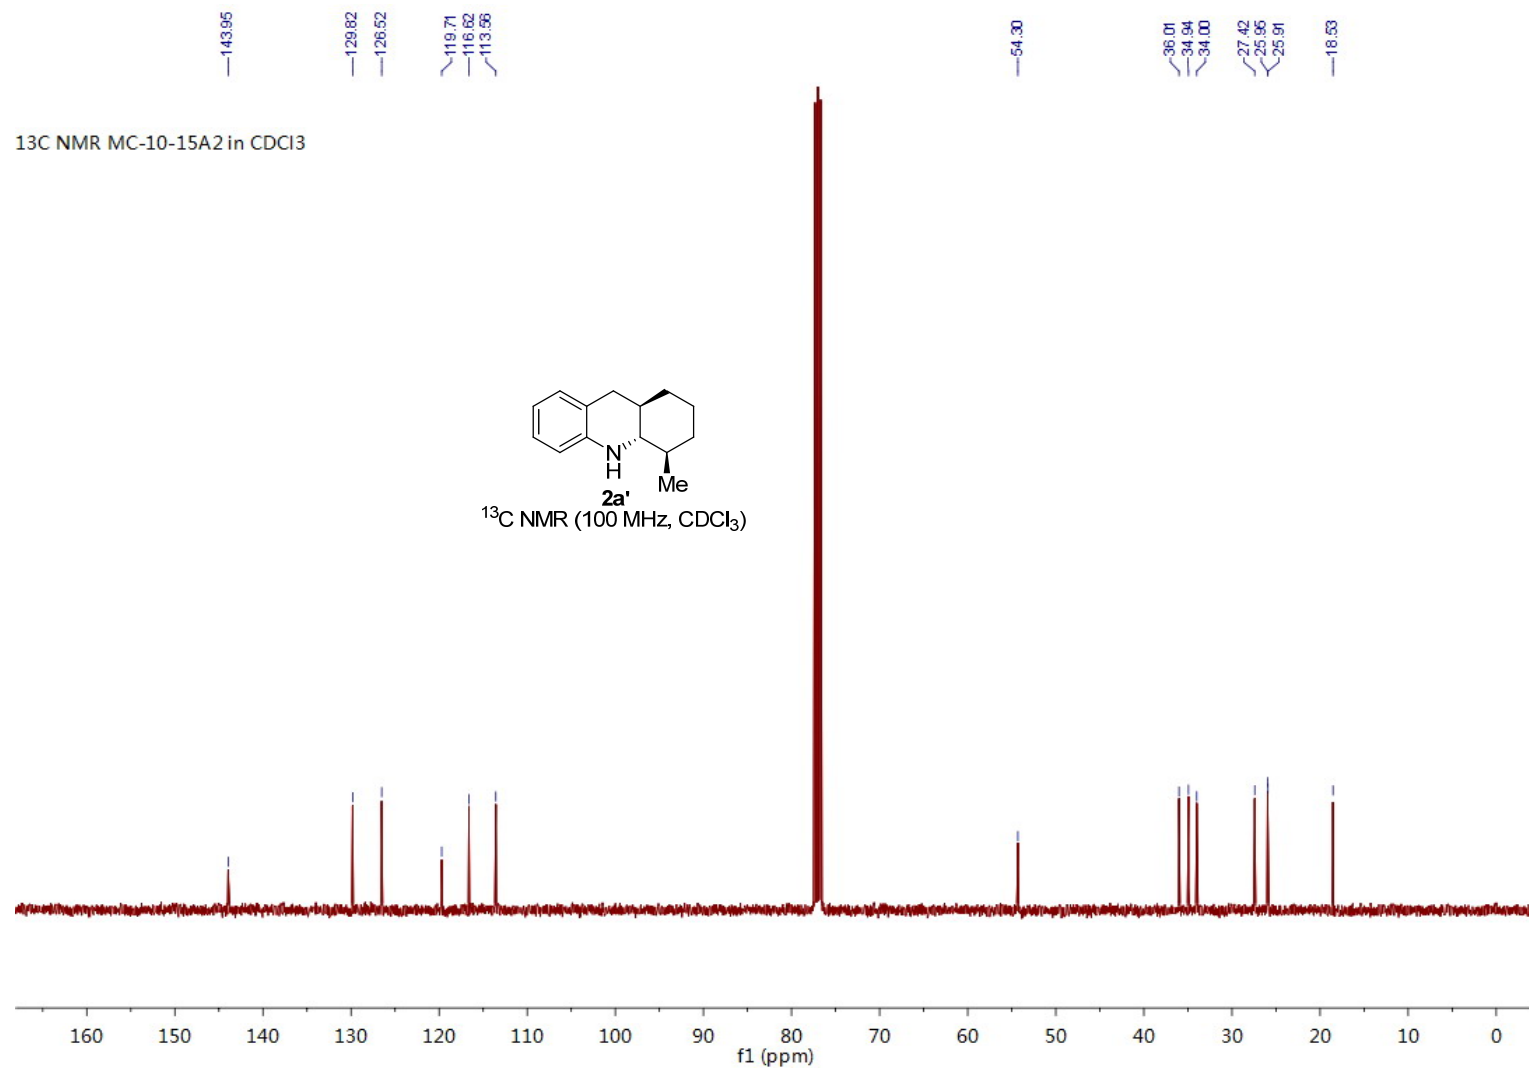

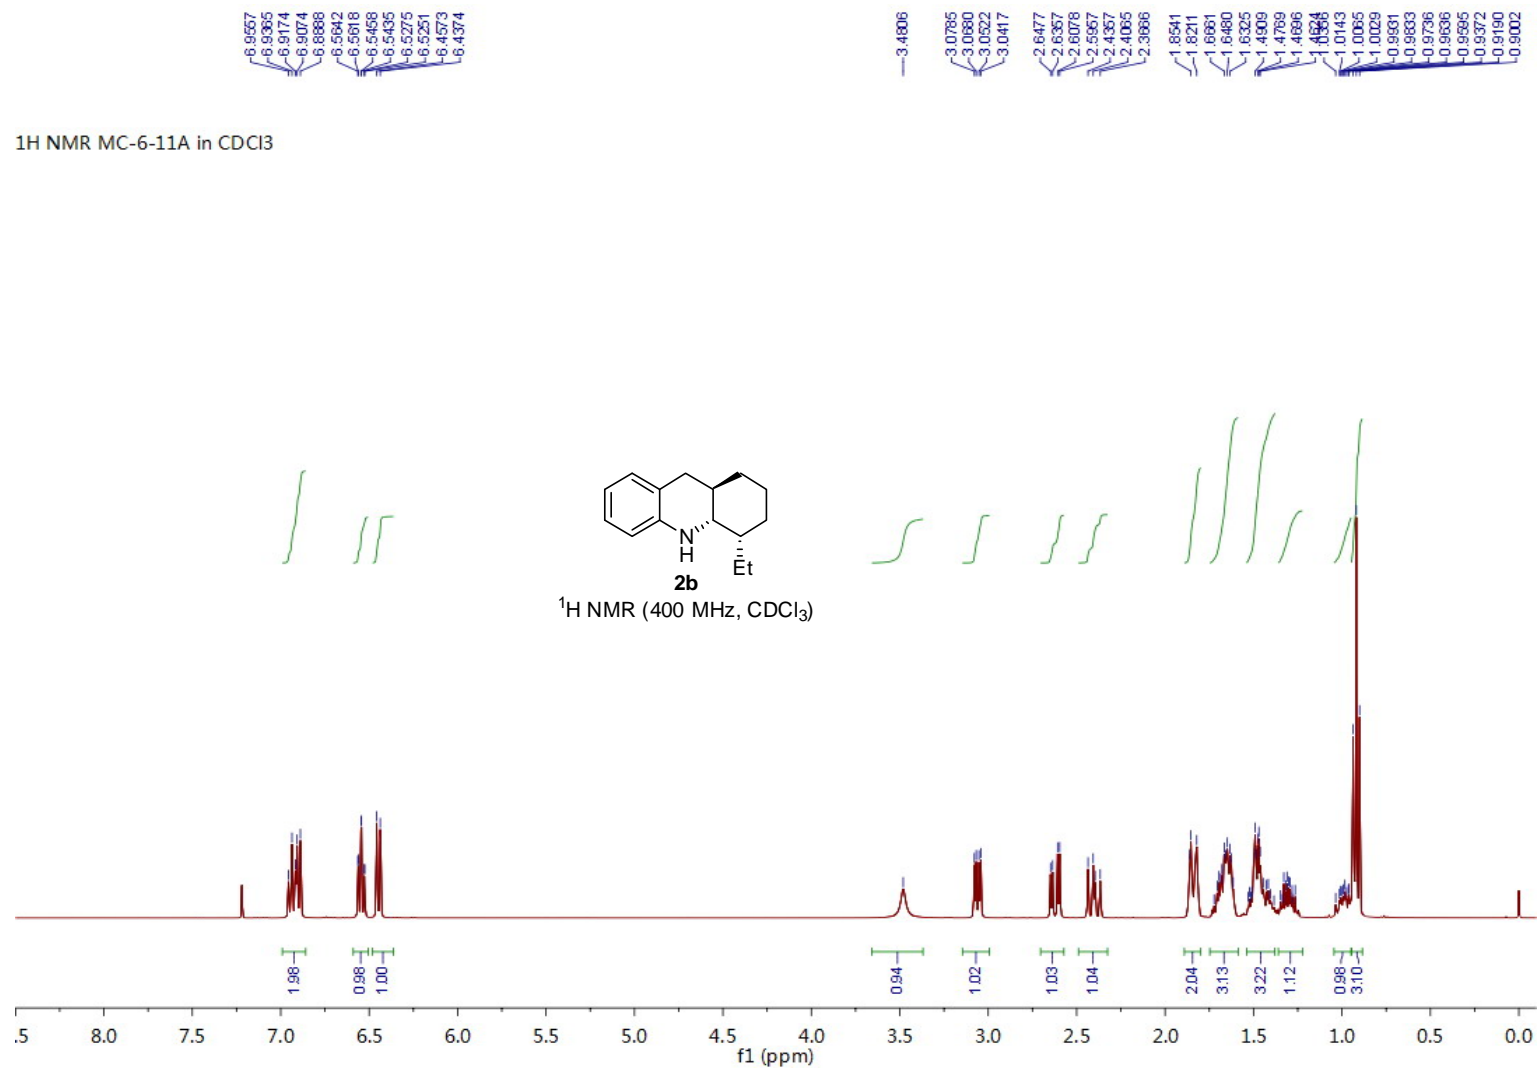

<sup>13</sup>C NMR MC-6-11A in CDCl<sub>3</sub>

145.01  
128.98  
126.71  
120.83  
116.34  
113.26  
59.28  
40.98  
35.02  
32.62  
30.80  
27.15  
19.90  
17.29  
12.88

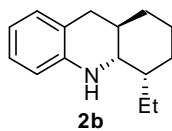

<sup>13</sup>C NMR (100 MHz, CDCl<sub>3</sub>)

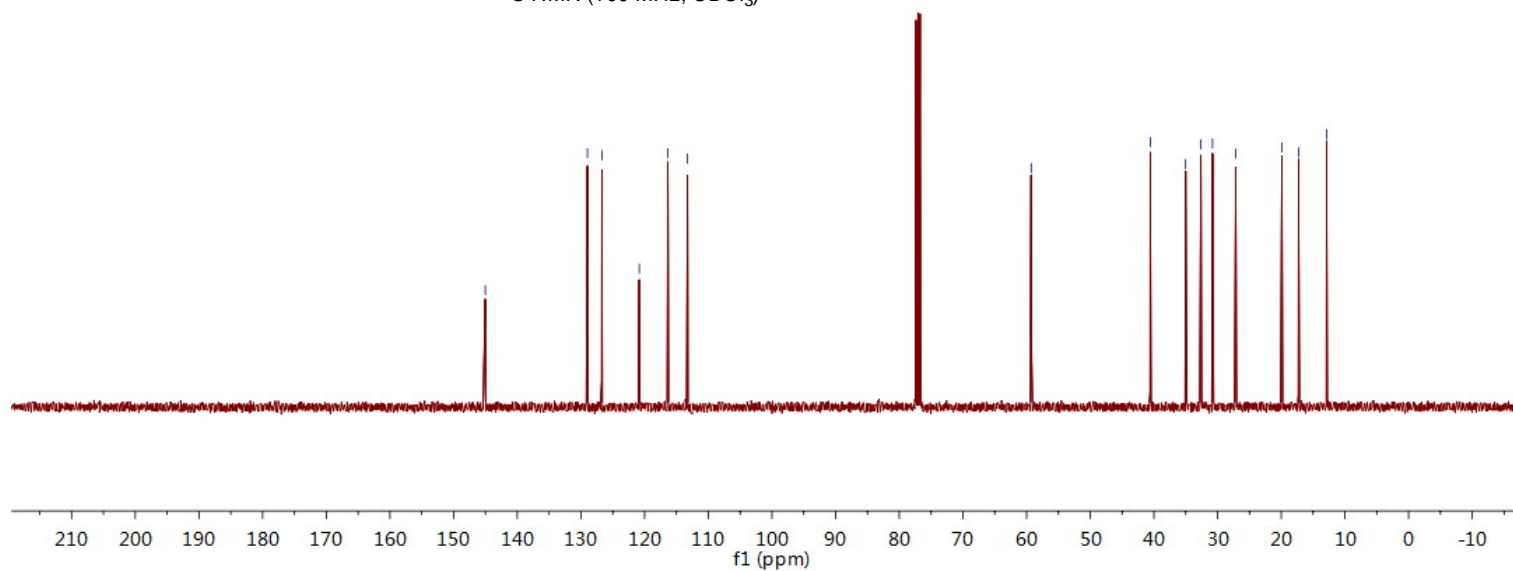

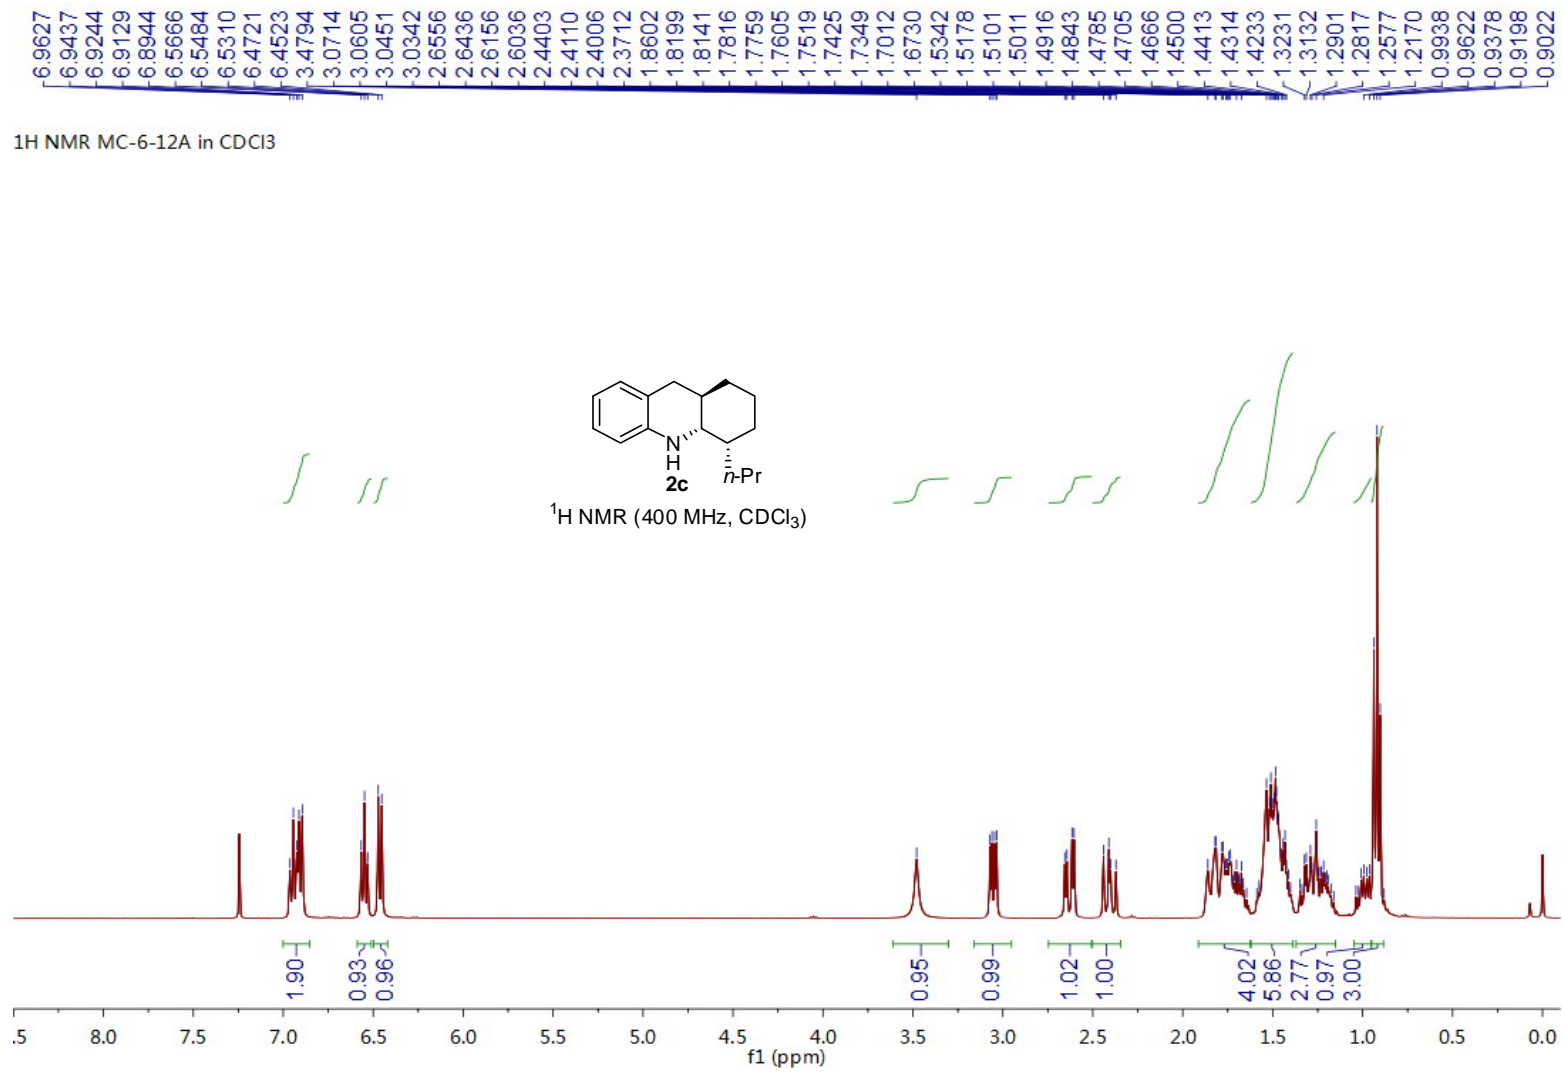



<sup>13</sup>C NMR MC-6-12A in CDCl<sub>3</sub>

~144.97

~128.96  
~126.69  
~120.82  
~116.32  
~113.21

~59.16

~38.37  
~34.97  
~32.58  
~30.76  
~27.88  
~26.98  
~21.63  
~20.00  
~14.47

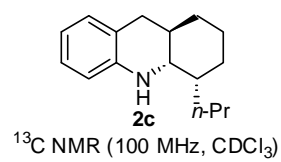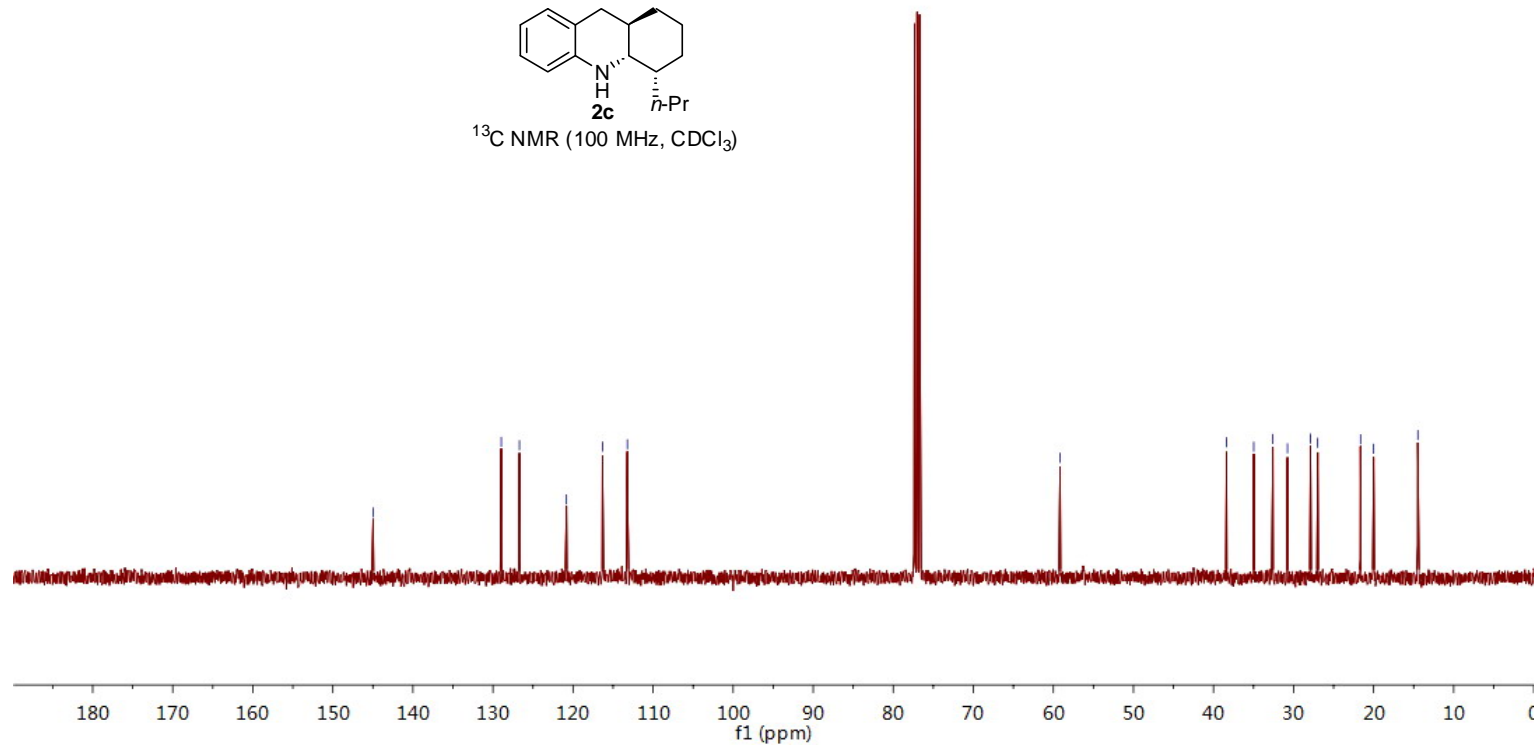

6.9635  
6.9444  
6.9252  
6.9138  
6.8953  
6.8688  
6.8504  
6.8321  
6.8298  
6.8141  
6.8543  
3.4836  
3.0751  
3.0488  
3.0377  
2.8552  
2.8441  
2.8162  
2.8042  
2.4410  
2.4118  
2.4012  
2.3719  
1.8618  
1.8281  
1.7964  
1.7909  
1.7418  
1.7304  
1.7227  
1.7148  
1.7148  
1.7050  
1.6928  
1.6876  
1.6759  
1.6660  
1.5961  
1.5849  
1.5780  
1.5718  
1.5636  
1.5439  
1.5191  
1.5105  
1.5017  
1.4922  
1.4848  
1.4784  
1.4629  
1.4403  
1.4318  
1.4197  
1.4149  
1.4112  
1.3999  
1.3883  
1.3834  
1.3745  
1.3638  
1.3506  
1.3447  
1.3277  
1.3174  
1.3113  
1.3018  
1.2939  
1.2840  
1.2760  
1.2685  
1.2581  
1.2199  
1.2054  
1.1926  
1.1791  
1.1709  
1.1669  
1.1542  
1.1096  
0.9957  
0.9781  
0.9640  
0.9235  
0.9056  
0.8879

<sup>1</sup>H NMR MC-6-12B in CDCl<sub>3</sub>

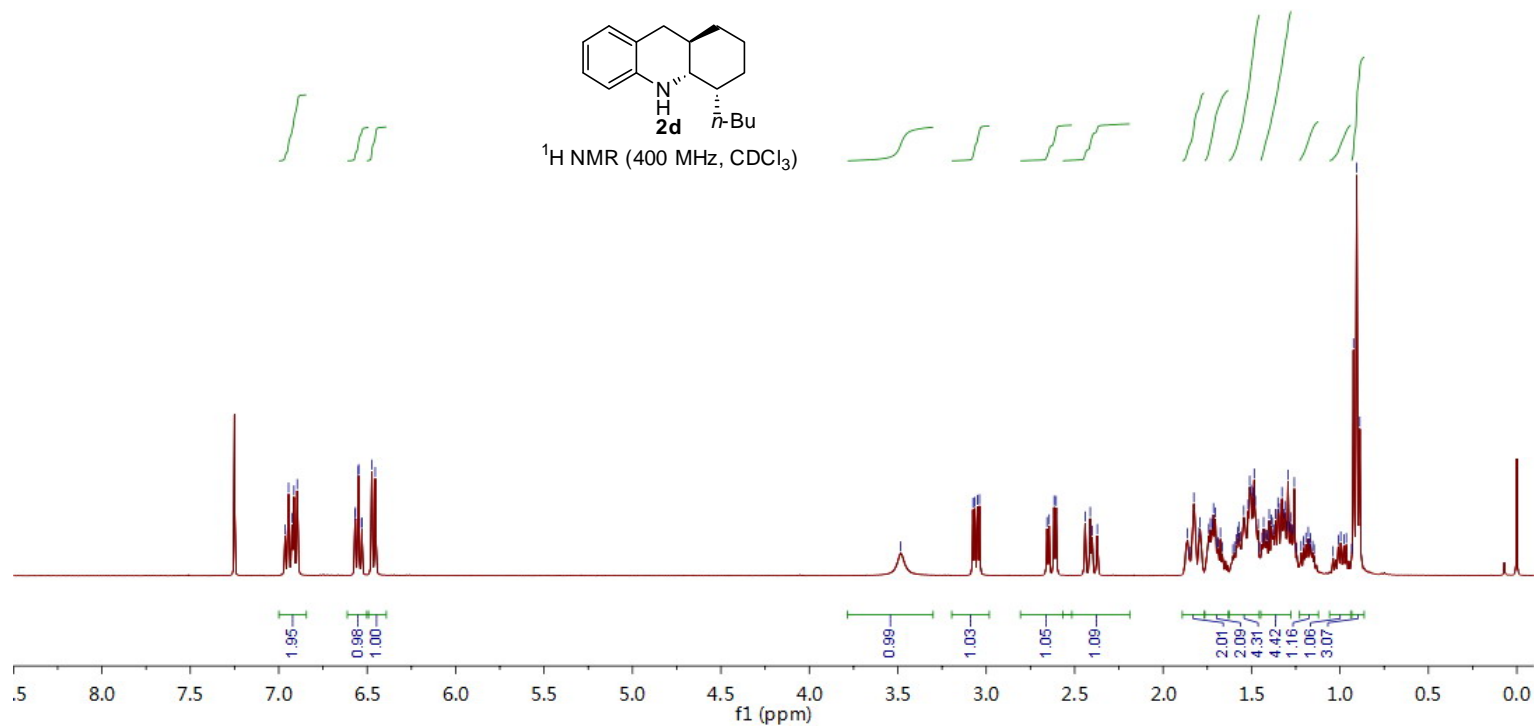

<sup>13</sup>C NMR MC-6-12B in CDCl<sub>3</sub>

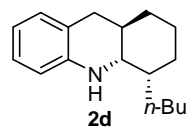

<sup>13</sup>C NMR (100 MHz, CDCl<sub>3</sub>)

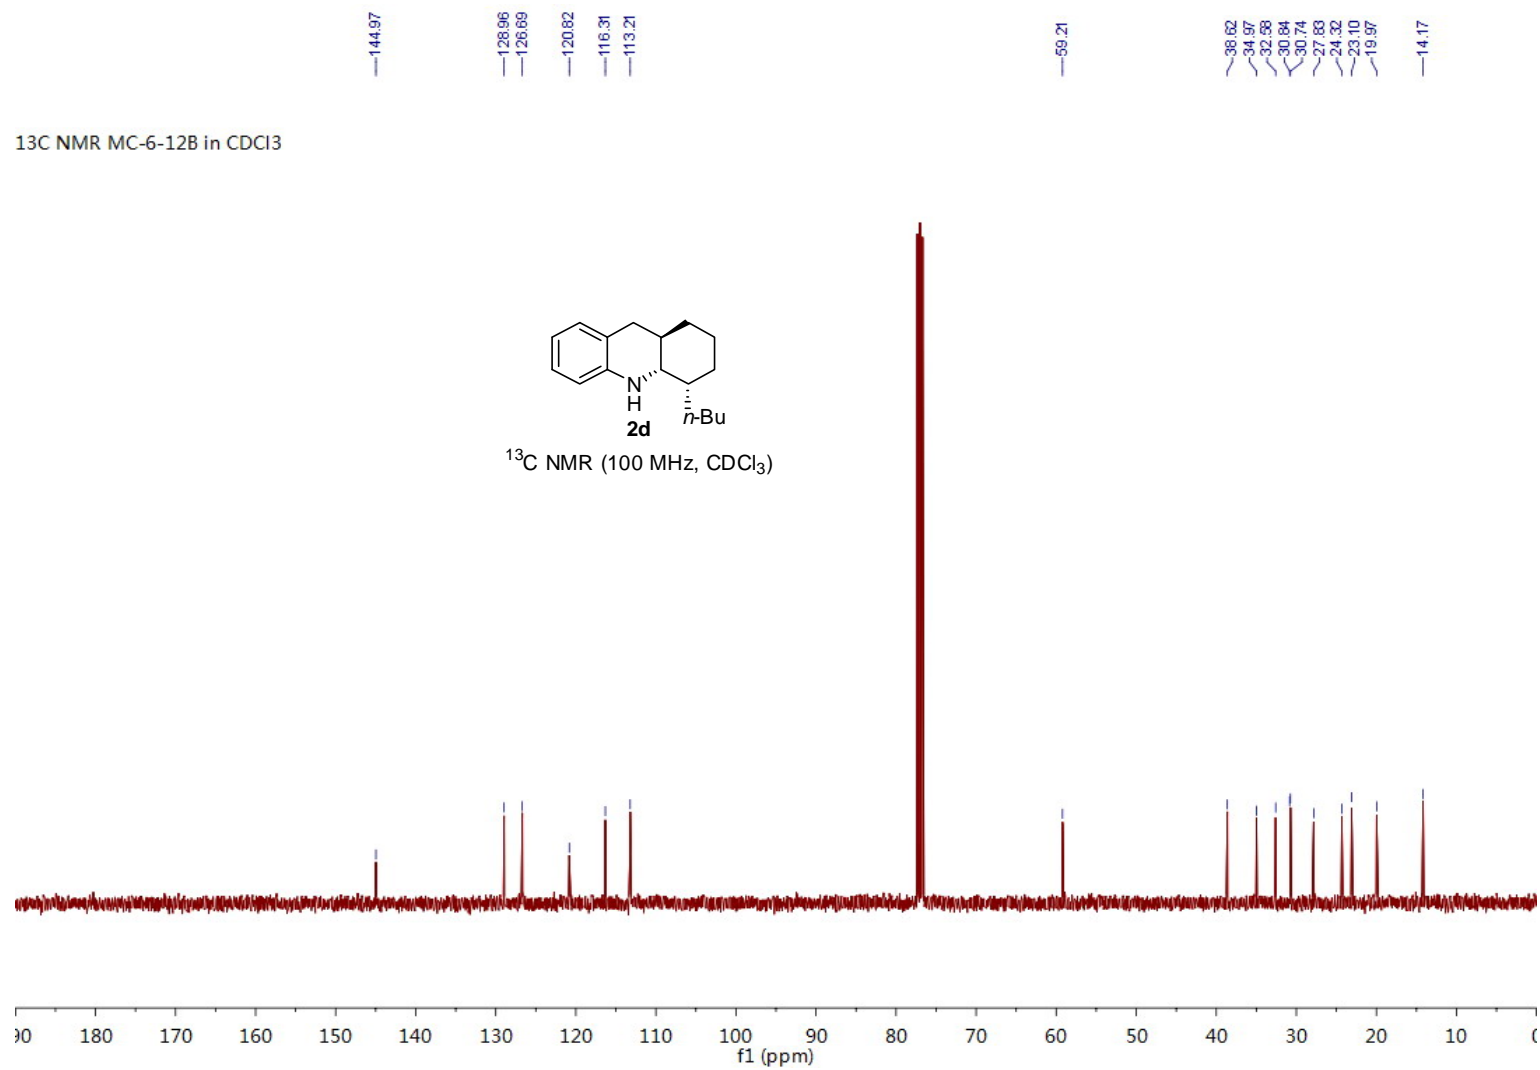

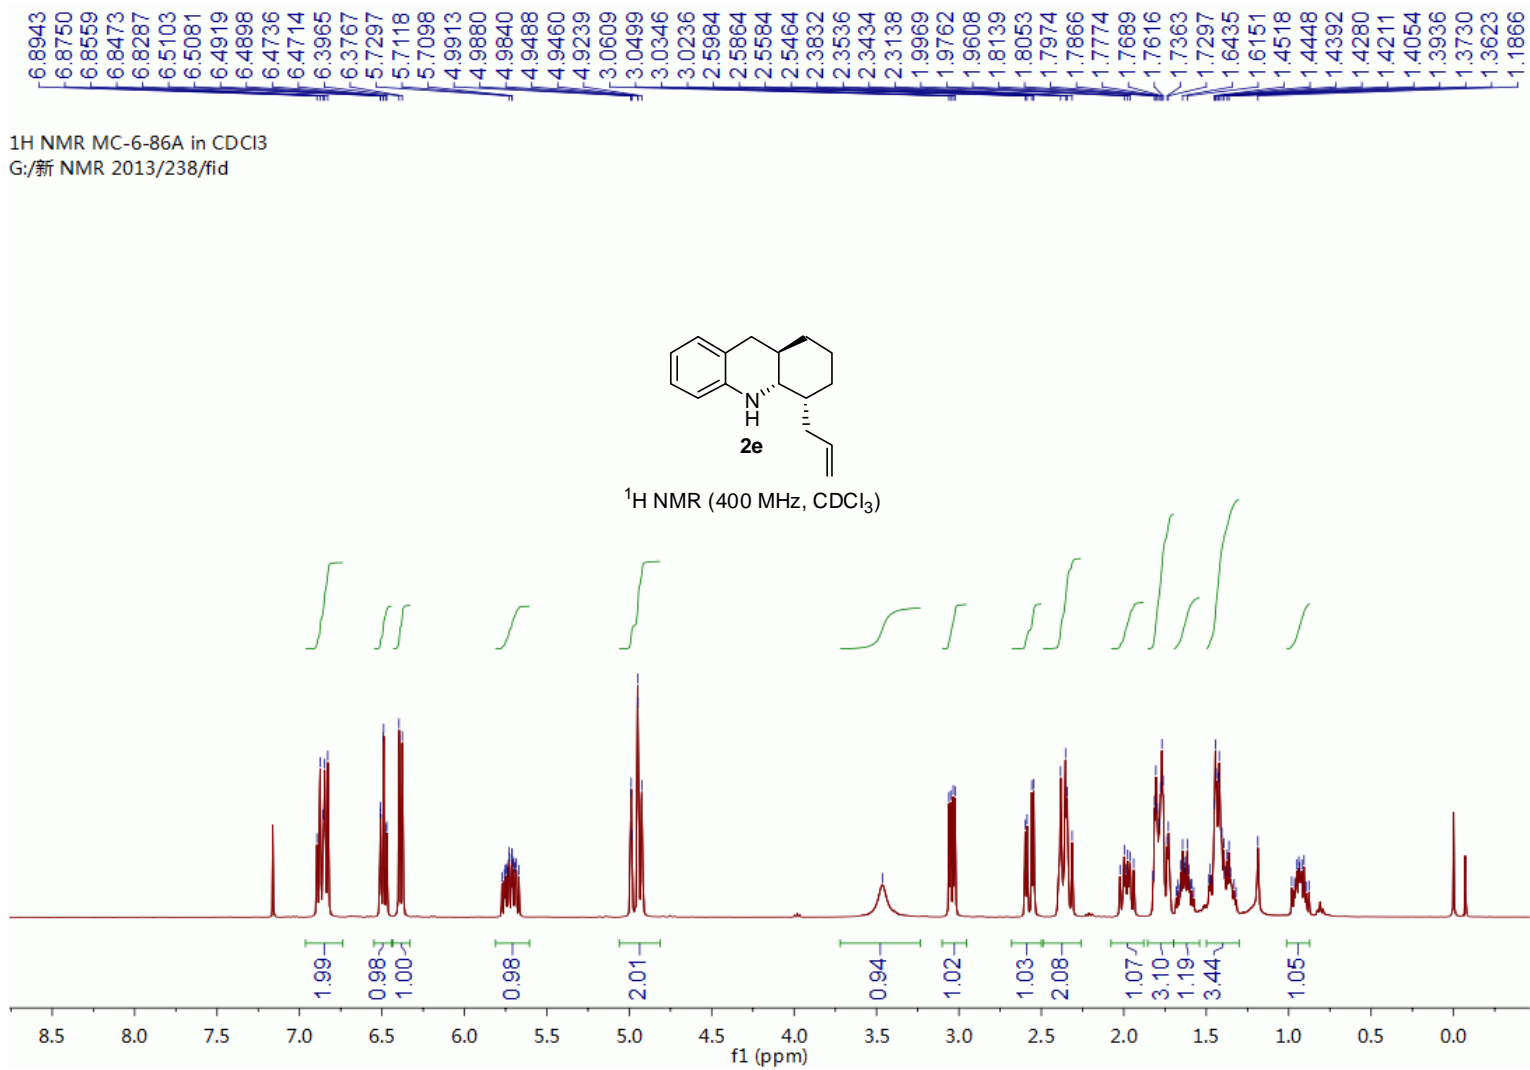

<sup>13</sup>C NMR MC-6-86A in CDCl<sub>3</sub>

—144.82  
—138.54  
~128.99  
~126.74  
~120.83  
~116.53  
~115.49  
~113.37

—58.76

~38.19  
~34.93  
~32.47  
~30.82  
~29.67  
~27.50  
—19.80

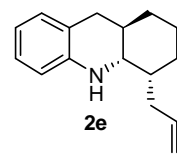

<sup>13</sup>C NMR (100 MHz, CDCl<sub>3</sub>)

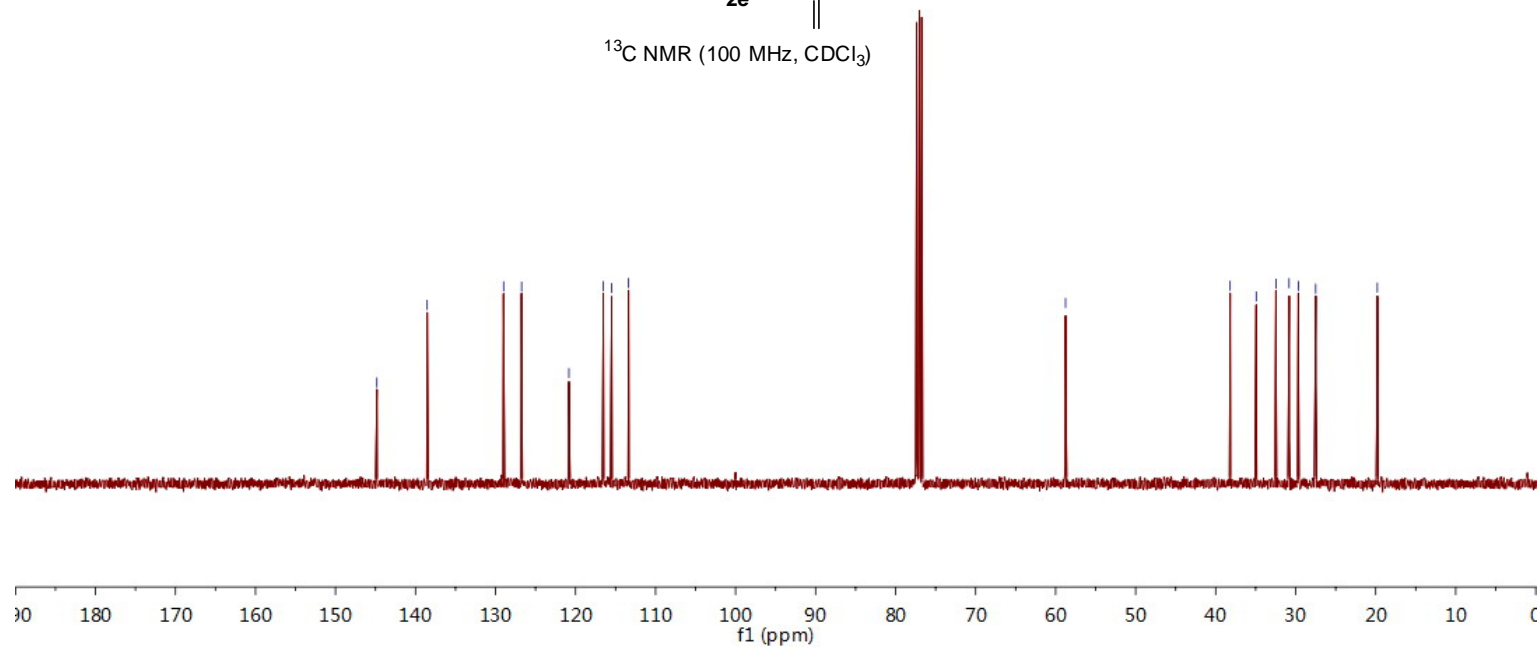

7.3065  
7.2888  
7.2886  
7.2415  
7.1995  
7.1840  
7.1705  
6.9832  
6.9644  
6.9451  
6.9271  
6.8018  
6.5995  
6.5835  
6.5662  
6.4623  
6.4425

3.5663  
3.2085  
3.1953  
3.1803  
3.1692  
3.0149  
3.0059  
2.6783  
2.6687  
2.5896  
2.5630  
2.4643  
1.6869  
1.6876  
1.6816  
1.6754  
1.6712  
1.6608  
1.6539  
1.5534  
1.5232  
1.3979  
1.0876  
1.0855  
1.0575  
1.0368  
1.0252  
1.0037  
0.9927

<sup>1</sup>H NMR MC-6-11B in CDCl<sub>3</sub>

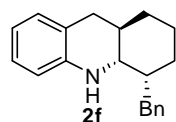

<sup>1</sup>H NMR (400 MHz, CDCl<sub>3</sub>)

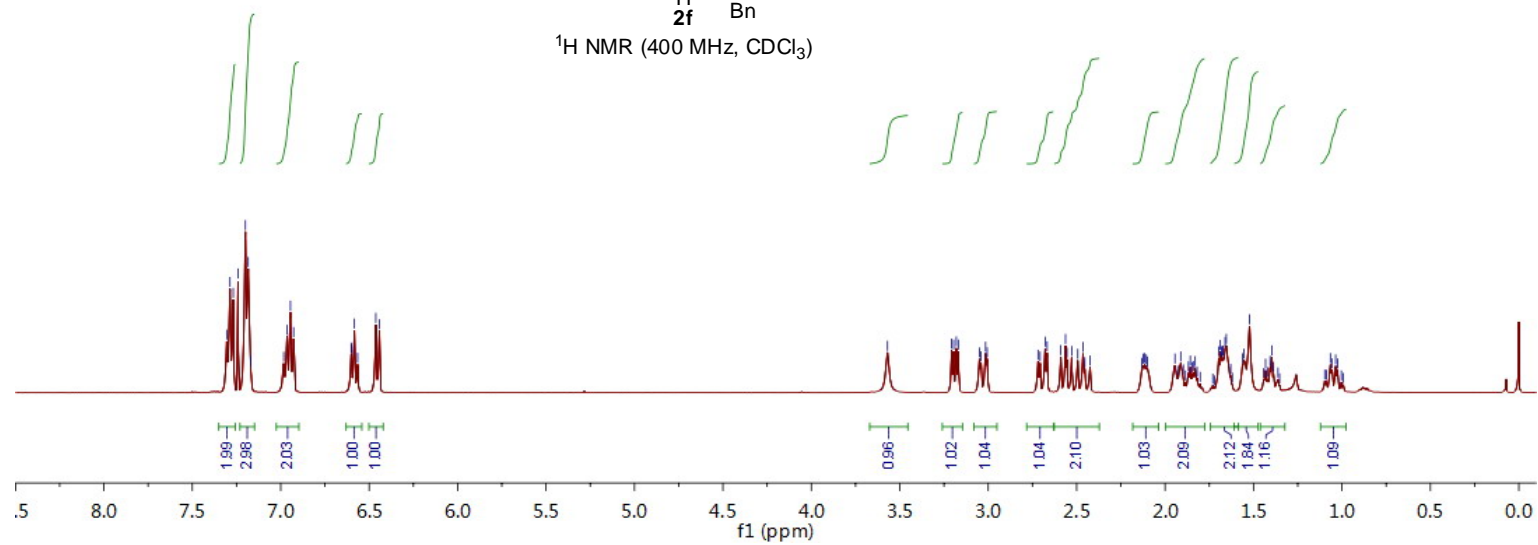

144.76  
142.37  
129.06  
129.00  
128.32  
126.78  
125.65  
120.83  
116.80  
113.46  
58.99  
40.81  
34.94  
32.56  
31.65  
30.88  
27.50  
20.01

<sup>13</sup>C NMR MC-6-11B in CDCl<sub>3</sub>

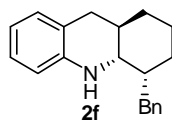

<sup>13</sup>C NMR (100 MHz, CDCl<sub>3</sub>)

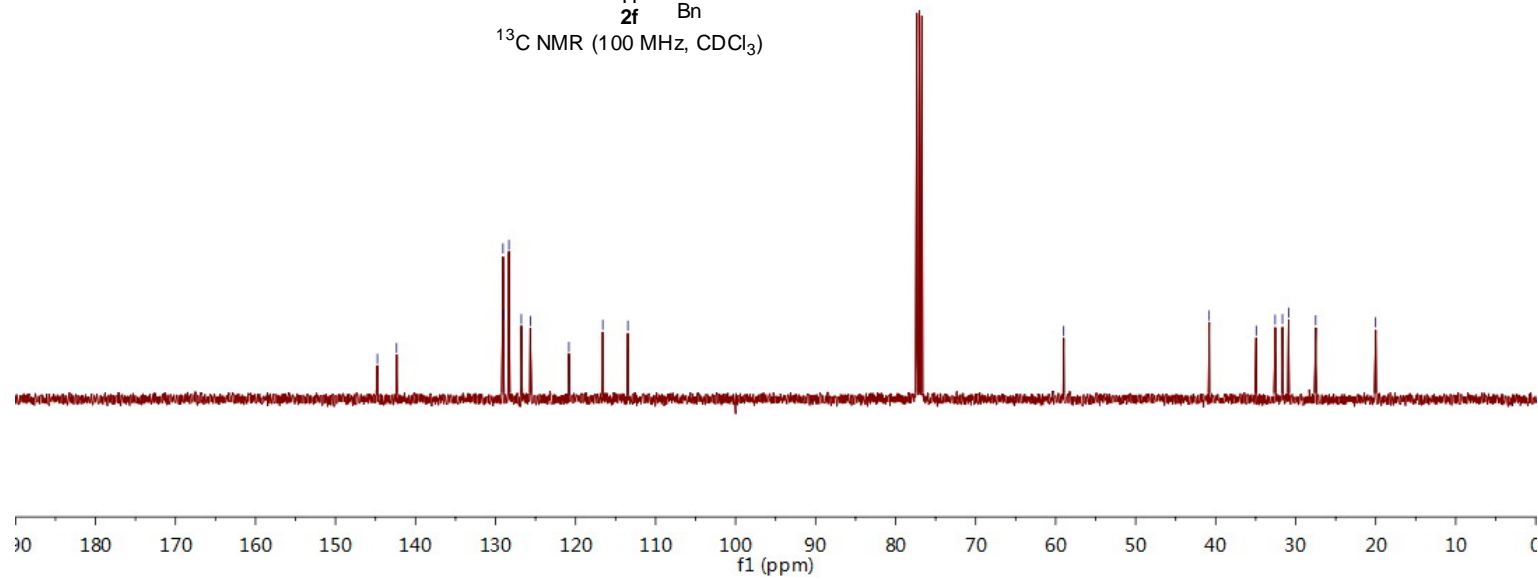

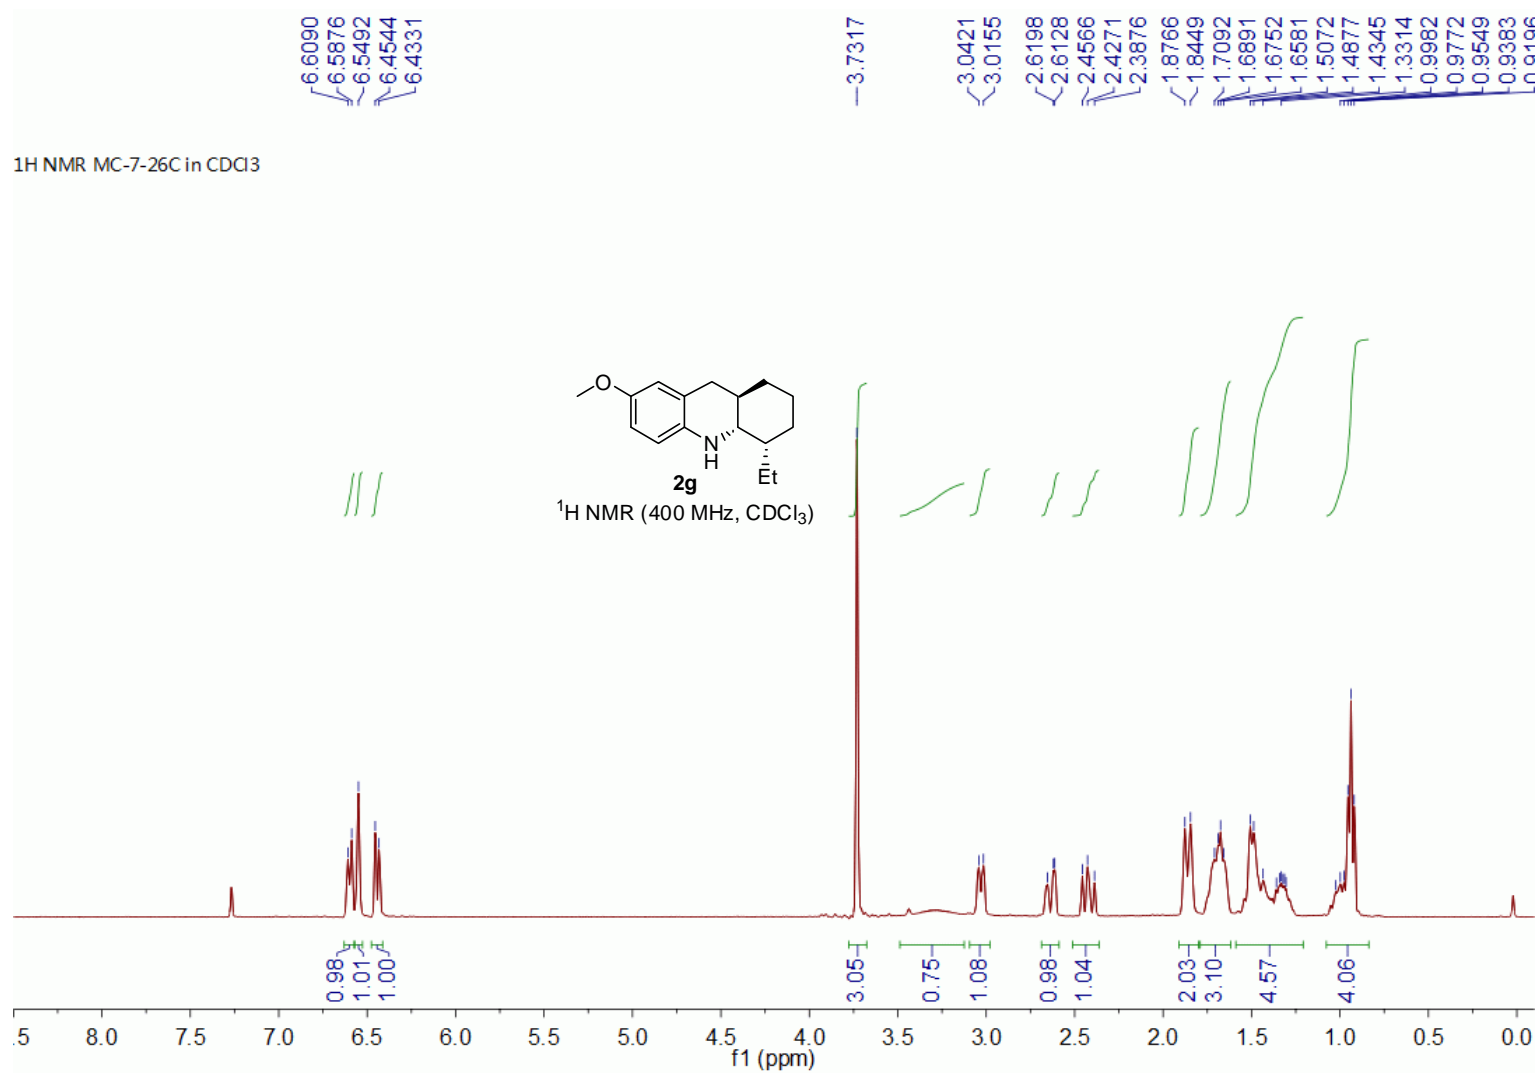



—151.52

—139.41

—122.18

—114.75

—114.47

—113.00

—59.57

—56.11

—40.67

—35.43

—32.87

—31.09

—27.35

—19.98

—17.48

—13.01

<sup>13</sup>C NMR MC-7-26C in CDCl<sub>3</sub>

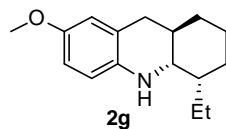

<sup>13</sup>C NMR (100 MHz, CDCl<sub>3</sub>)

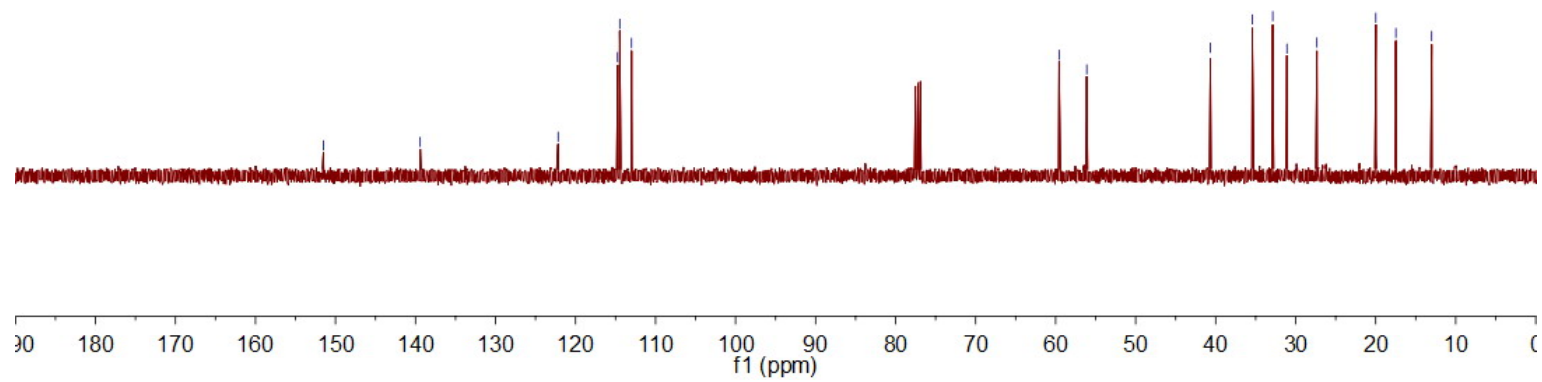

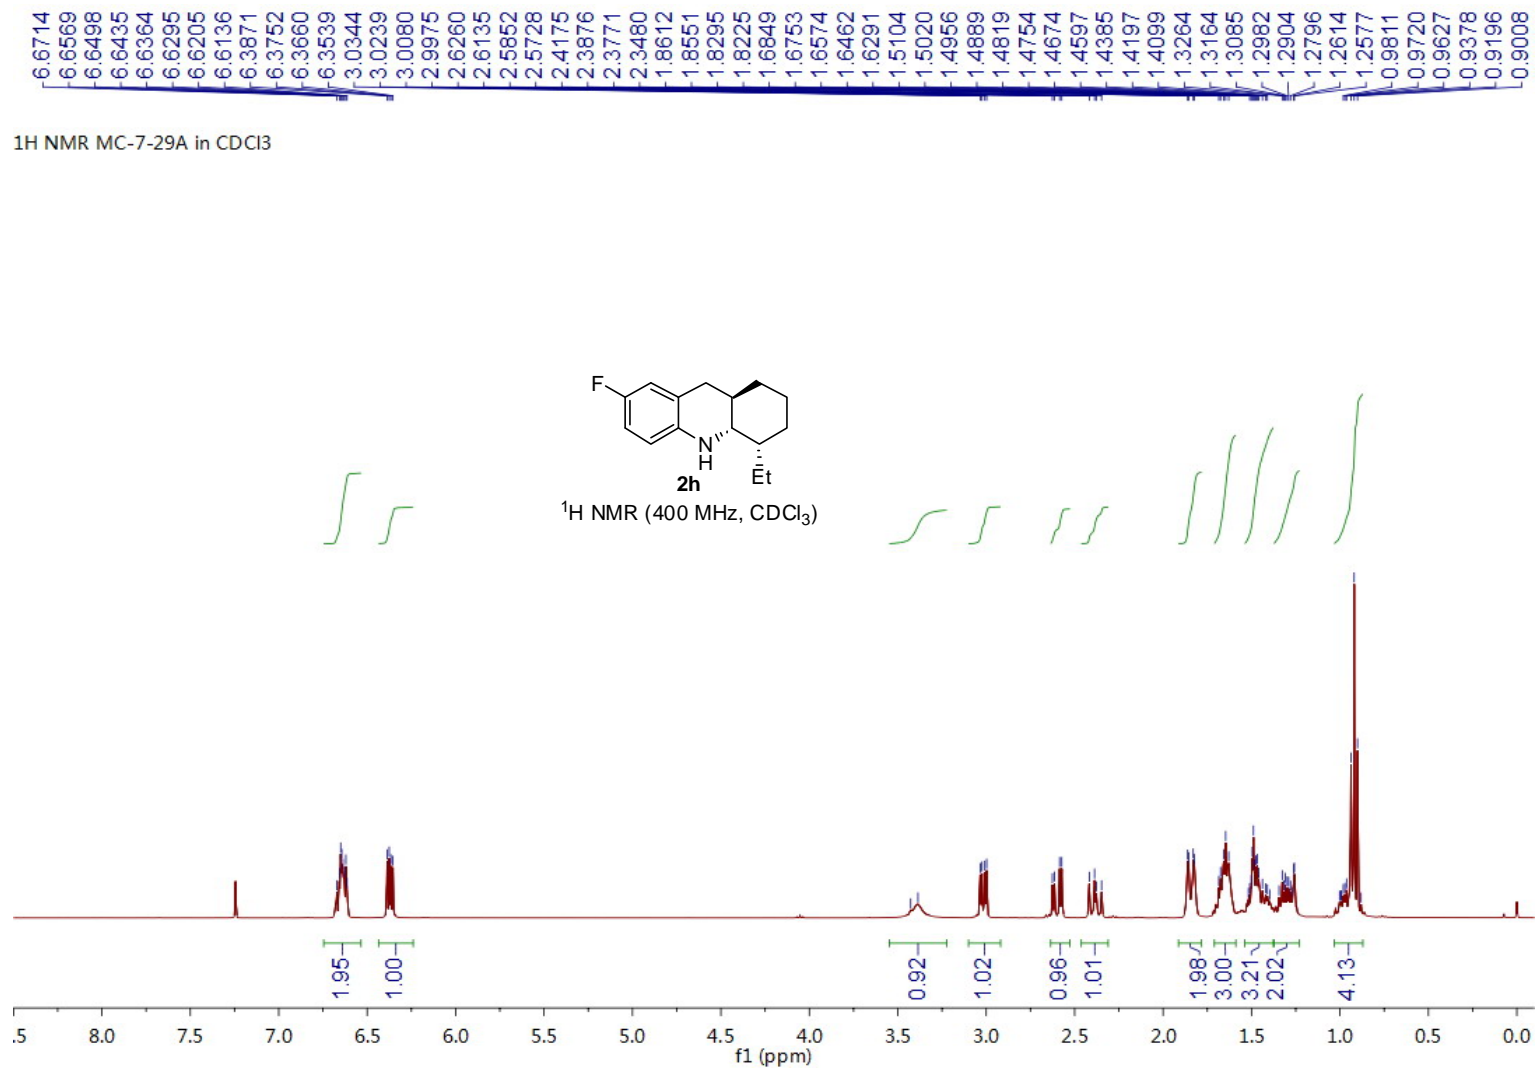

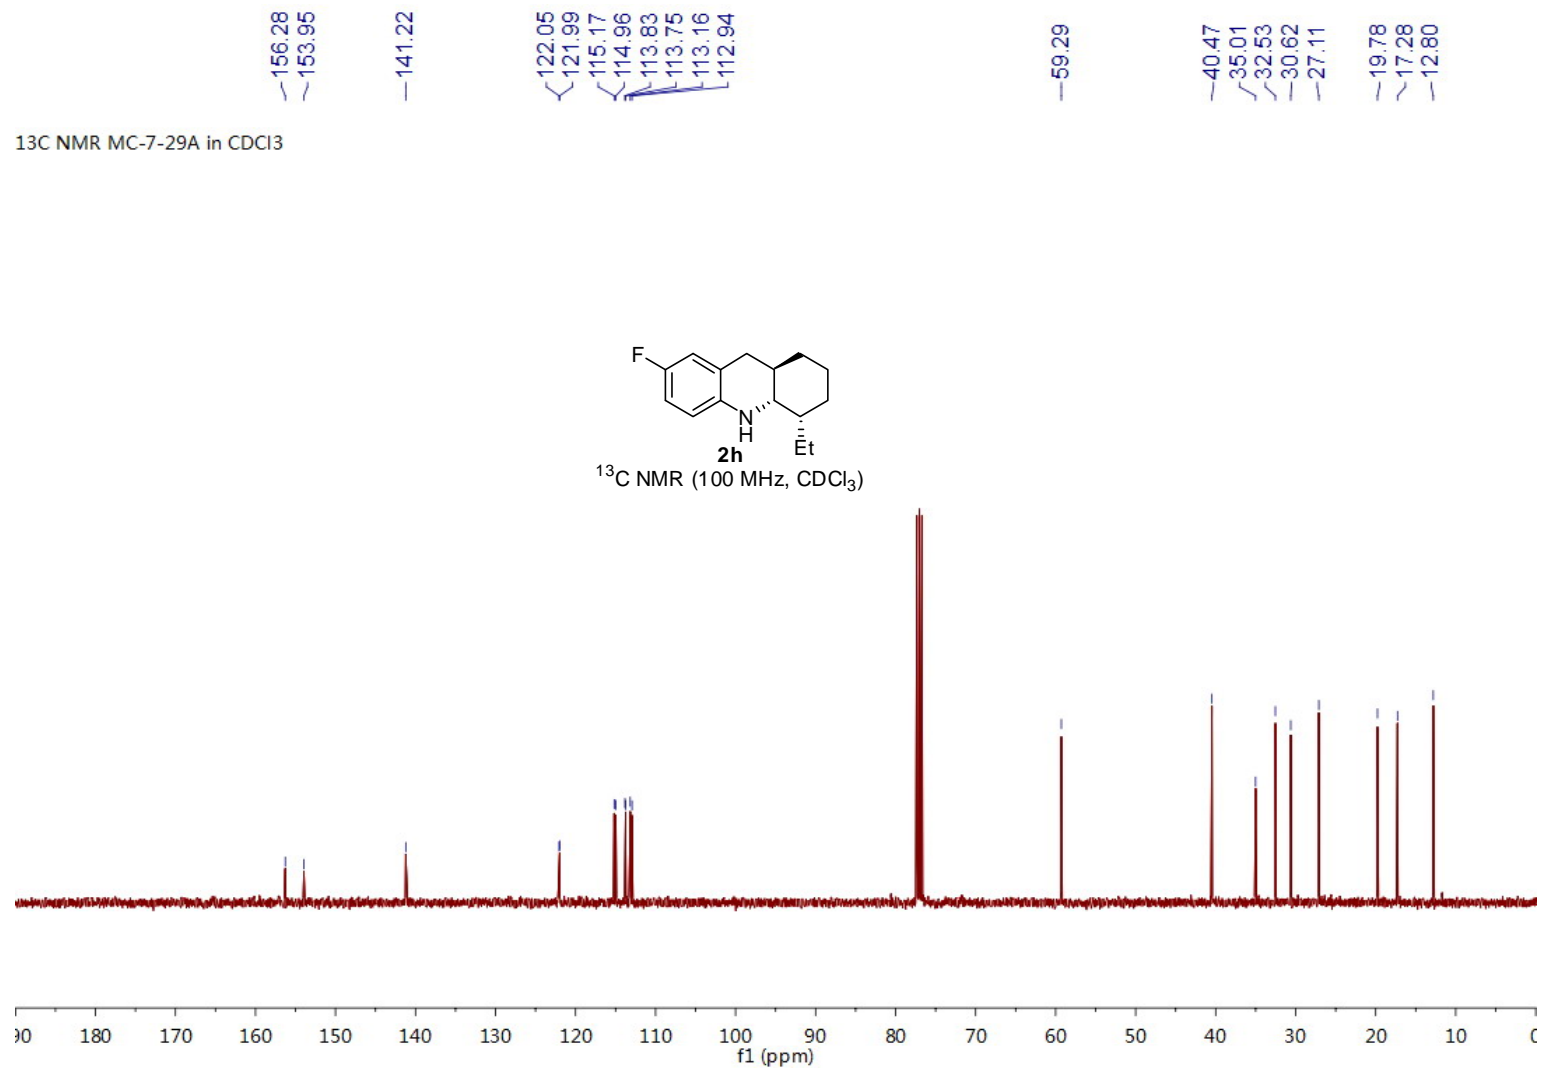

<sup>19</sup>F NMR MC-7-29A in CDCl<sub>3</sub>

---129.17

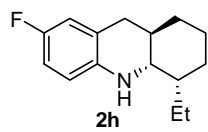

<sup>19</sup>F NMR (376 MHz, CDCl<sub>3</sub>)

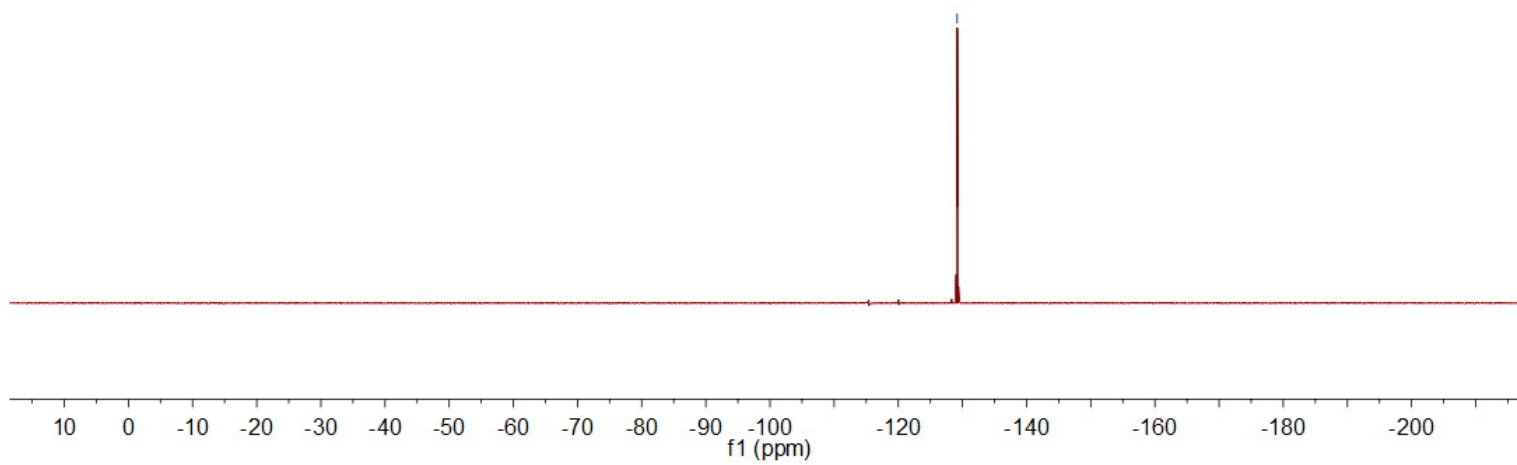

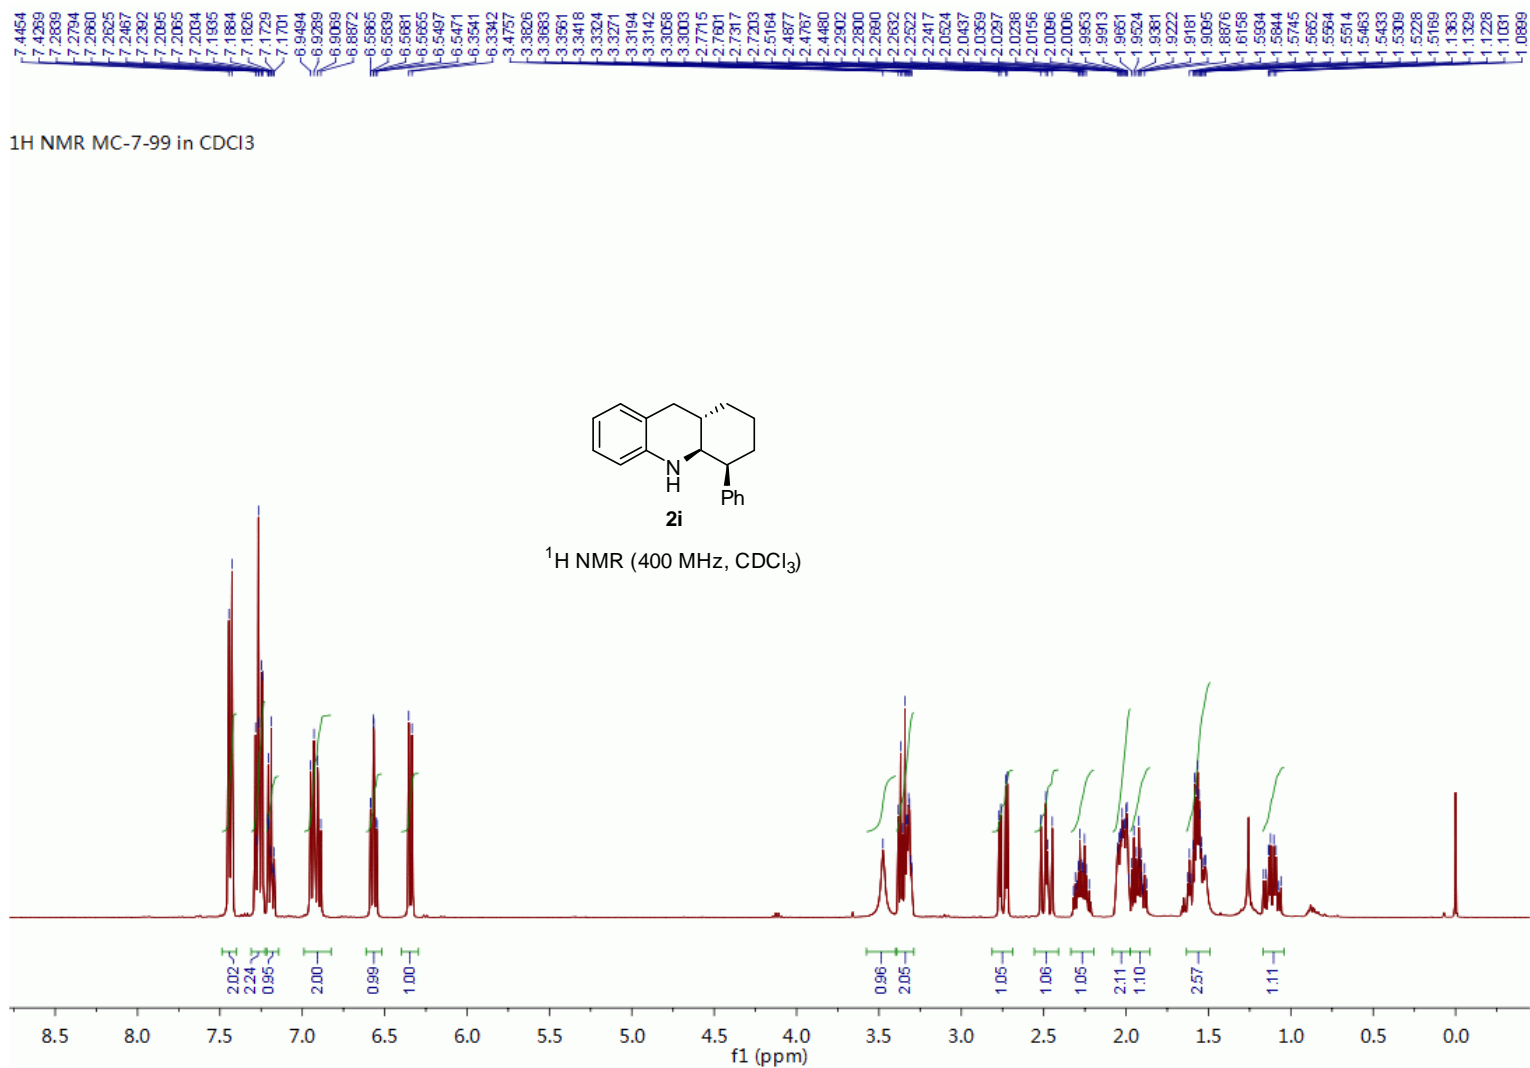

<sup>13</sup>C NMR MC-7-99 in CDCl<sub>3</sub>

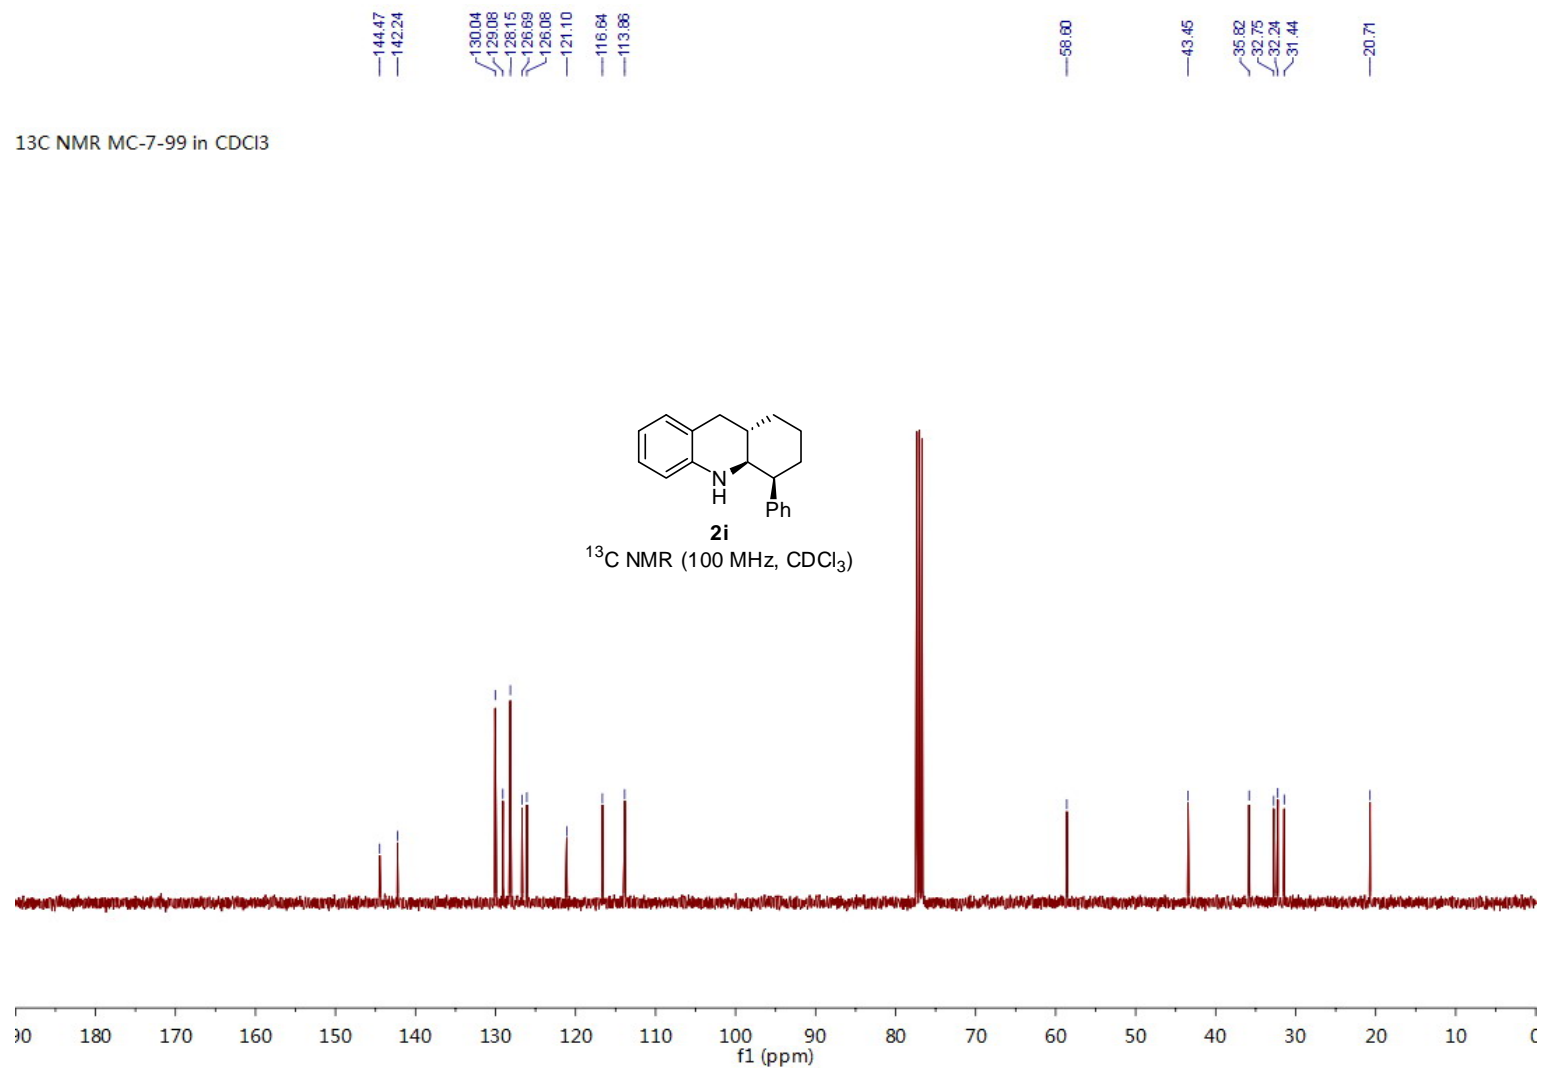

7.3348  
7.3169  
7.2962  
7.2884  
7.2203  
7.1740  
7.1568

3.7178  
3.3340  
3.3238  
3.3074  
3.2872  
3.0864  
3.0679  
3.0584  
2.7628  
2.7353  
2.5909  
2.5769  
2.5392  
2.5034  
1.9075  
1.8672  
1.8578  
1.8465  
1.8301  
1.8189  
1.8099  
1.2888

<sup>1</sup>H NMR MC-11-8B CDCl<sub>3</sub>

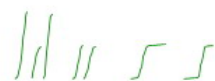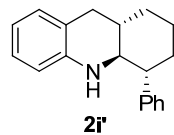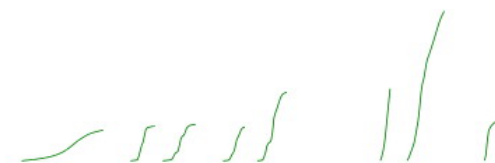

<sup>1</sup>H NMR (400 MHz, CDCl<sub>3</sub>)

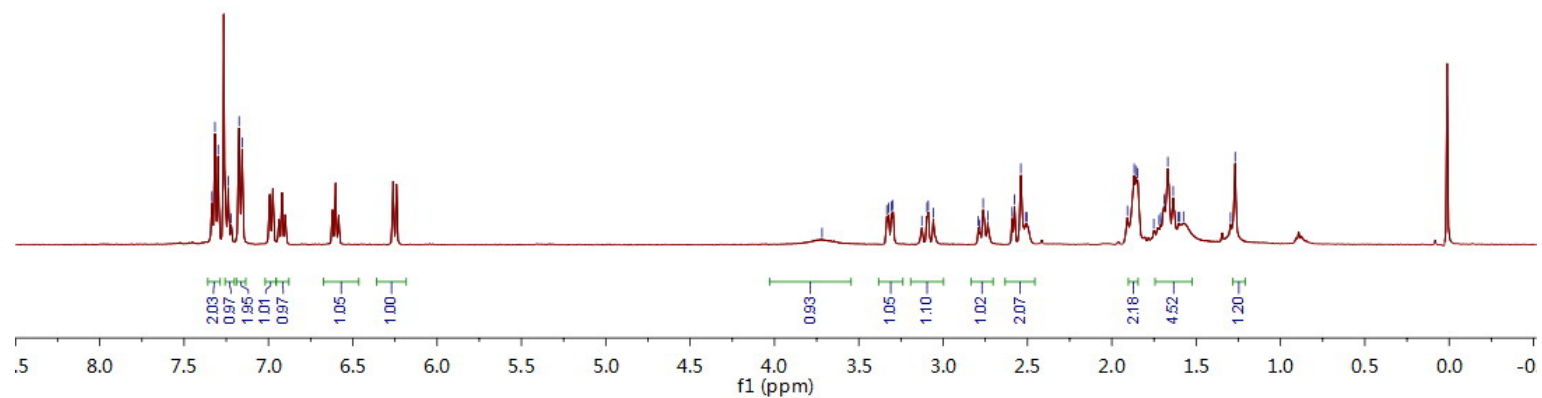

<sup>13</sup>C NMR MC-11-8B CDCl<sub>3</sub>

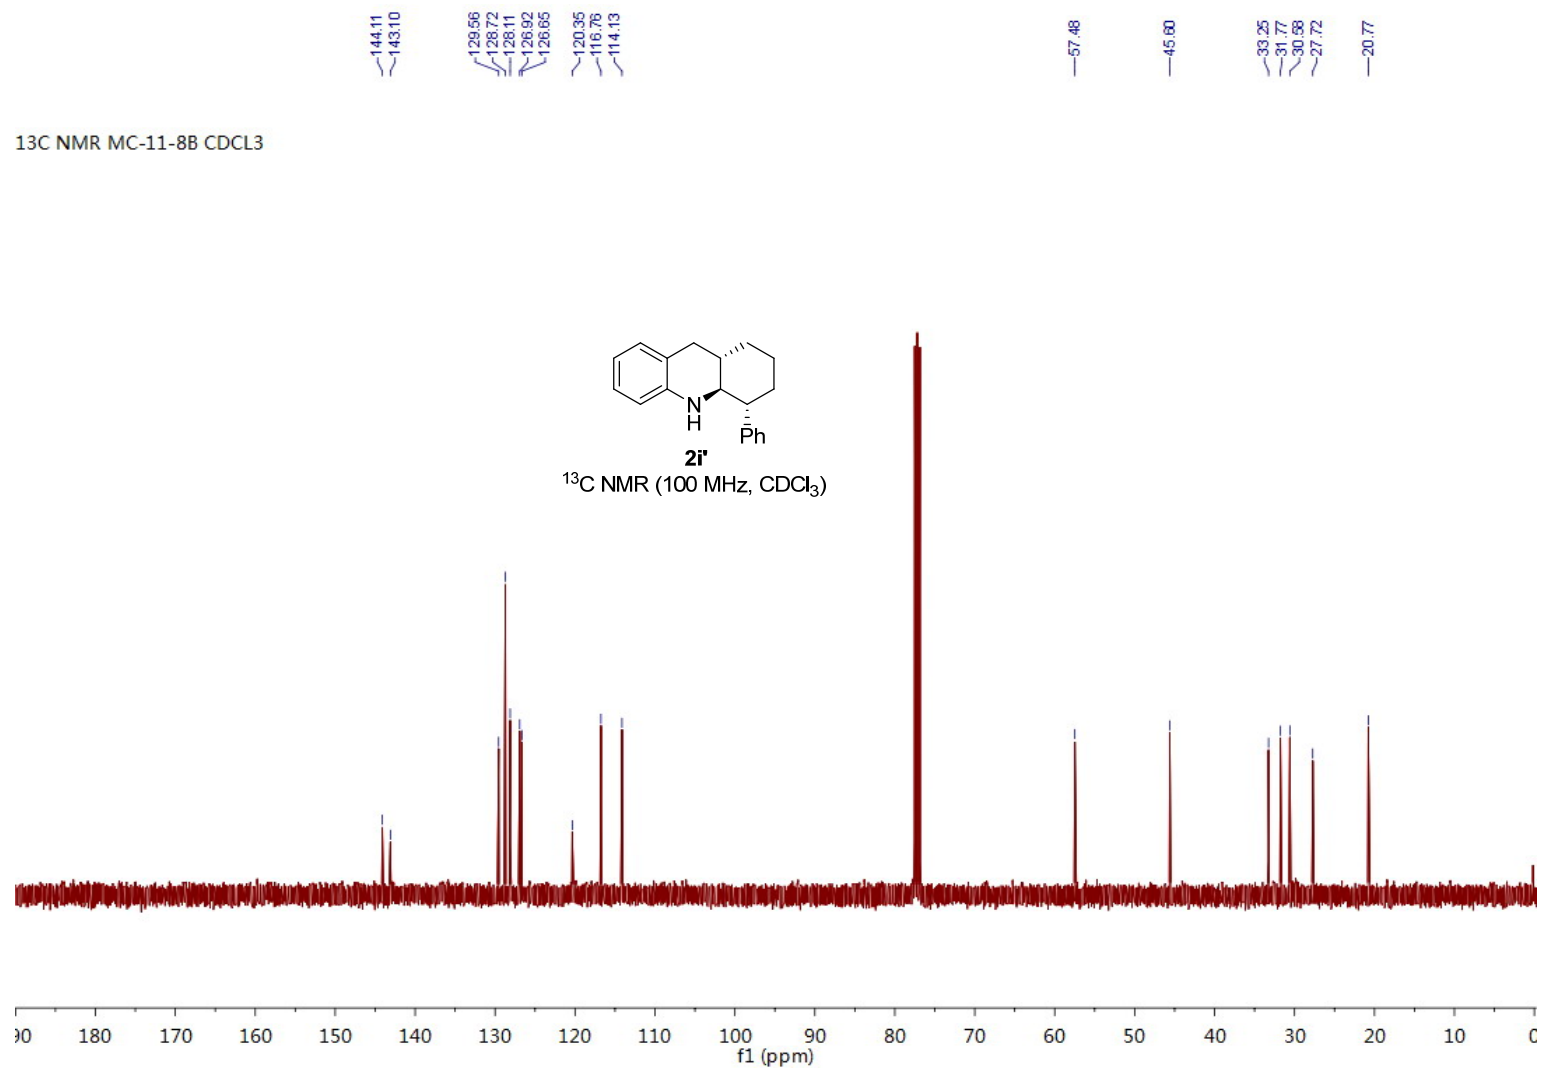



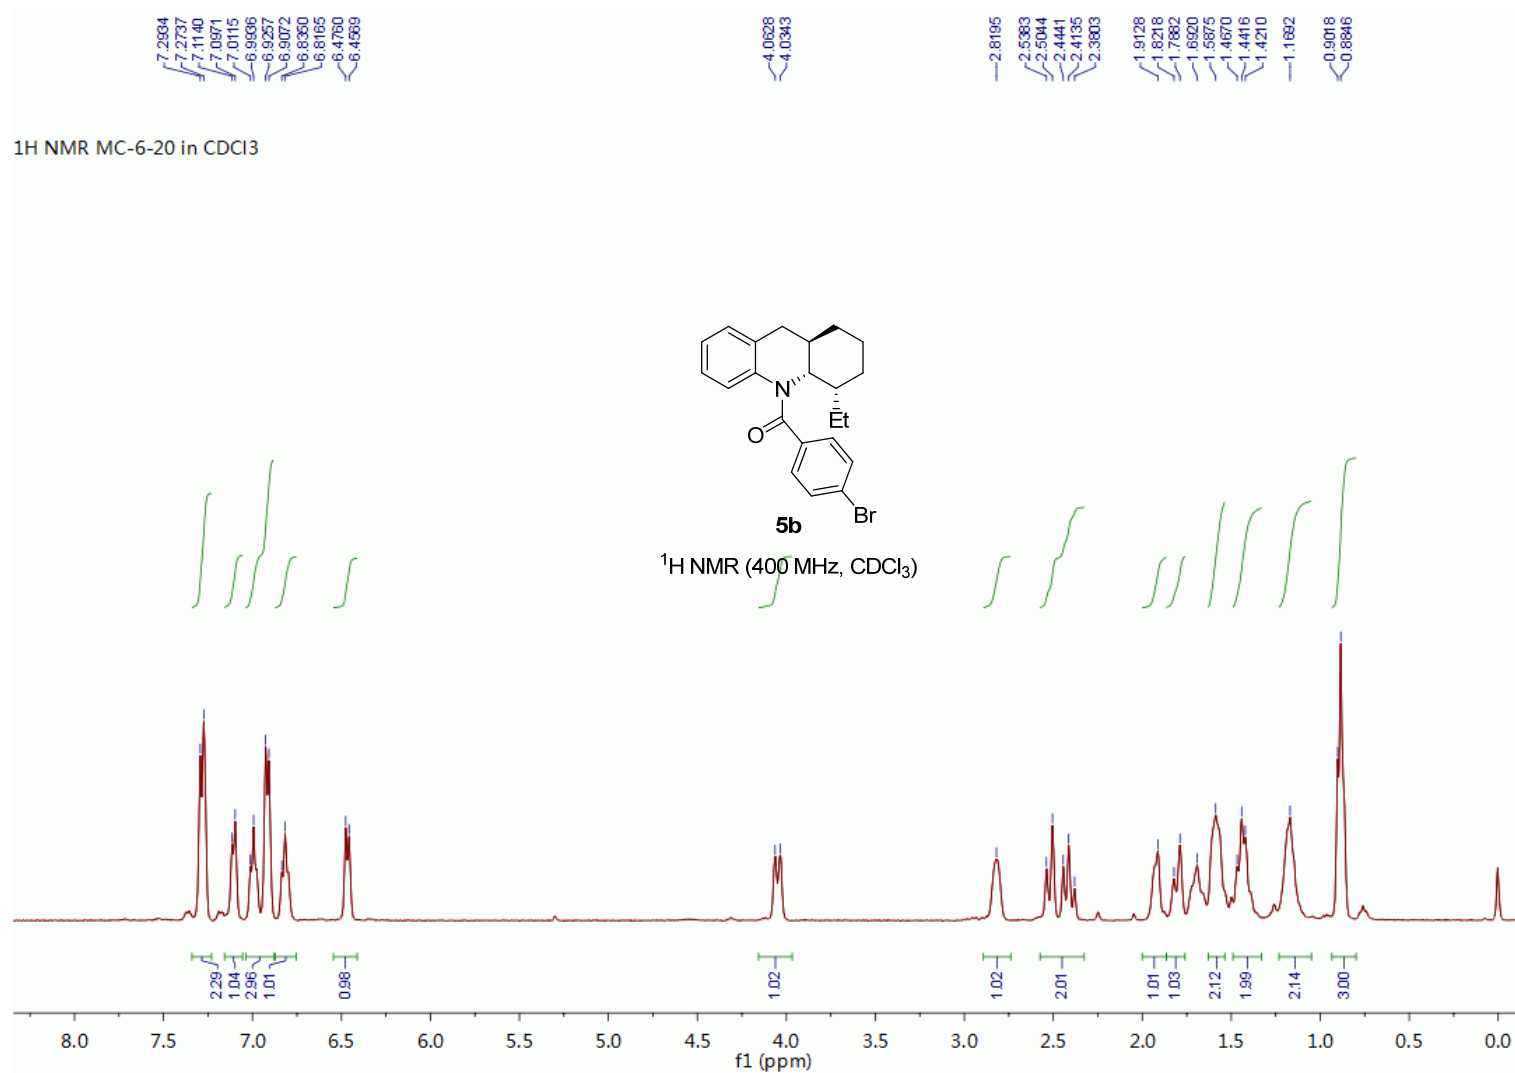

<sup>13</sup>C NMR MC-6-20 in CDCl<sub>3</sub>

169.85

139.23  
136.28  
136.25  
131.05  
130.13  
127.01  
126.91  
126.27  
125.25  
123.69

67.60

40.05  
39.09  
35.16  
33.47  
27.24  
21.18  
18.88  
12.90

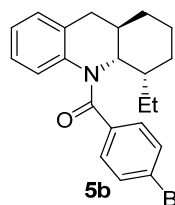

<sup>13</sup>C NMR (100 MHz, CDCl<sub>3</sub>)

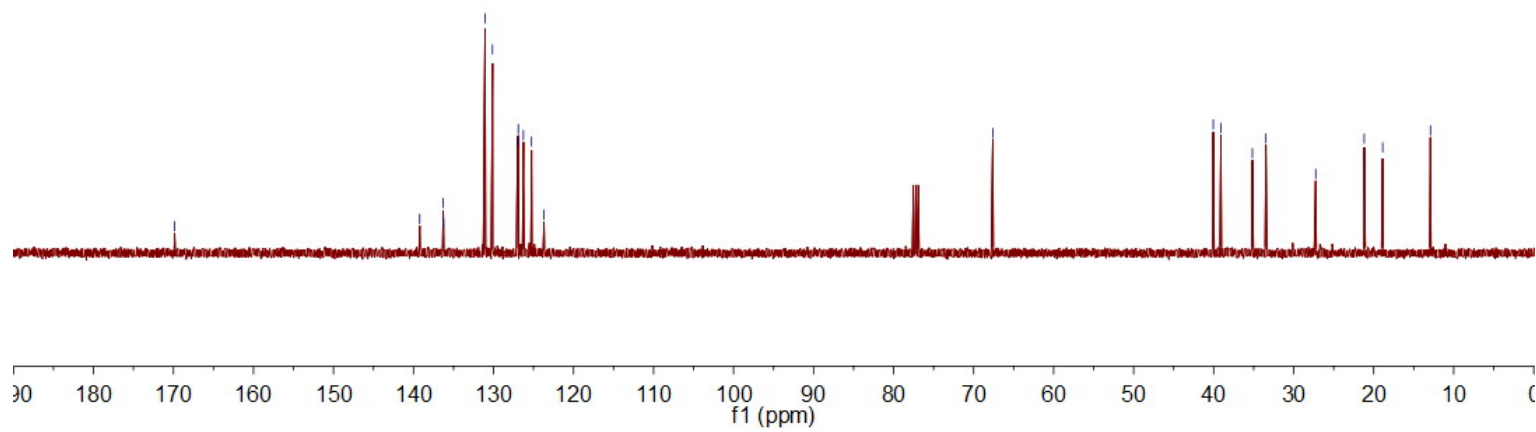

Data File C:\CHEM32\1\DATA\ZHOU-13\YZN003361.D  
 Sample Name: MC-5-27+-

=====  
 Acq. Operator : YZ  
 Acq. Instrument : Instrument 1 Location : Vial 1  
 Injection Date : 8/21/2013 2:14:53 PM  
 Acq. Method : C:\CHEM32\1\METHODS\DEF.LC.M  
 Last changed : 8/21/2013 1:53:40 PM by YZ  
 (modified after loading)  
 Analysis Method : C:\CHEM32\1\METHODS\DEF.LC.M  
 Last changed : 11/13/2013 4:45:07 PM by B  
 (modified after loading)  
 Sample Info : OJ-H, H/1-PrOH = 95/5, 0.8 mL/min, 300C, 254nm

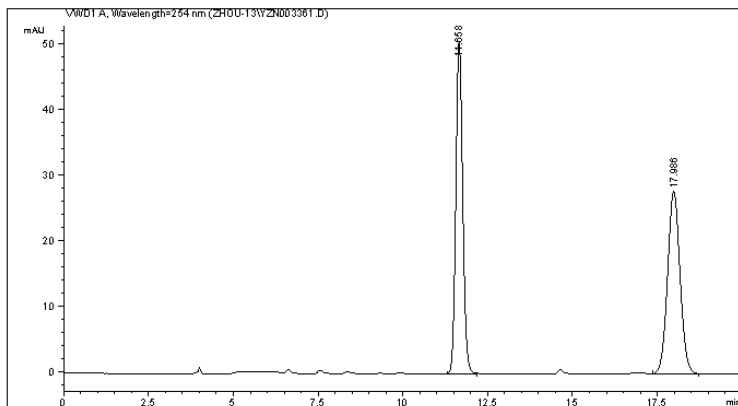

=====  
 Area Percent Report  
 =====

Sorted By : Signal  
 Multiplier: : 1.0000  
 Dilution: : 1.0000  
 Use Multiplier & Dilution Factor with ISTDs

Signal 1: WVD1 A, Wavelength=254 nm

| Peak # | RetTime [min] | Type | Width [min] | Area mAU*s | Height [mAU] | Area %  |
|--------|---------------|------|-------------|------------|--------------|---------|
| 1      | 11.658        | BB   | 0.2168      | 713.17542  | 50.61831     | 50.1338 |
| 2      | 17.986        | BB   | 0.3918      | 709.36865  | 27.85067     | 49.8662 |

Totals : 1422.54407 78.46898

=====  
 \*\*\* End of Report \*\*\*

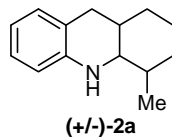

Data File C:\CHEM32\1\DATA\ZHOU-13\YZN003365.D  
 Sample Name: MC-6-10A

=====  
 Acq. Operator : YZ  
 Acq. Instrument : Instrument 1 Location : Vial 1  
 Injection Date : 8/21/2013 4:10:53 PM  
 Acq. Method : C:\CHEM32\1\METHODS\DEF.LC.M  
 Last changed : 8/21/2013 4:07:54 PM by YZ  
 (modified after loading)  
 Analysis Method : C:\CHEM32\1\METHODS\DEF.LC.M  
 Last changed : 11/13/2013 4:45:07 PM by B  
 (modified after loading)  
 Sample Info : OJ-H, H/1-PrOH = 95/5, 0.8 mL/min, 300C, 254nm

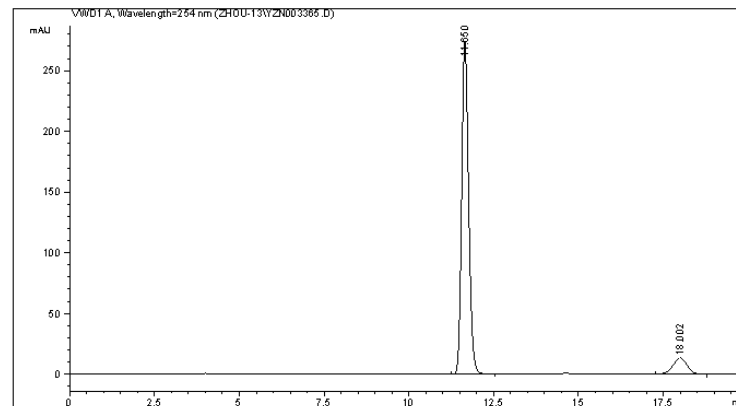

=====  
 Area Percent Report  
 =====

Sorted By : Signal  
 Multiplier: : 1.0000  
 Dilution: : 1.0000  
 Use Multiplier & Dilution Factor with ISTDs

Signal 1: WVD1 A, Wavelength=254 nm

| Peak # | RetTime [min] | Type | Width [min] | Area mAU*s | Height [mAU] | Area %  |
|--------|---------------|------|-------------|------------|--------------|---------|
| 1      | 11.650        | BB   | 0.2188      | 3905.93799 | 273.89850    | 90.7243 |
| 2      | 18.002        | BB   | 0.4503      | 399.34677  | 13.54464     | 9.2757  |

Totals : 4305.28476 287.44314

=====  
 \*\*\* End of Report \*\*\*

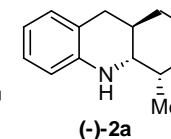

Data File G:\YZ004873.D  
 Sample Name: MC-6-10C+-

=====  
 Acq. Operator : ZHOU  
 Acq. Instrument : Instrument 1 Location : Vial 1  
 Injection Date : 8/27/2013 10:41:52 AM  
 Acq. Method : C:\HPCHEM\1\METHODS\DEF.LC.M  
 Last changed : 8/27/2013 9:51:22 AM by ZHOU  
 (modified after loading)  
 Analysis Method : C:\CHEM32\1\METHODS\DEF.LC.M  
 Last changed : 11/19/2013 2:42:02 PM by B  
 (modified after loading)  
 Sample Info : OJ-H, H/1-PrOH = 95/5, 0.8 mL/min, 30 oC, 254 nm

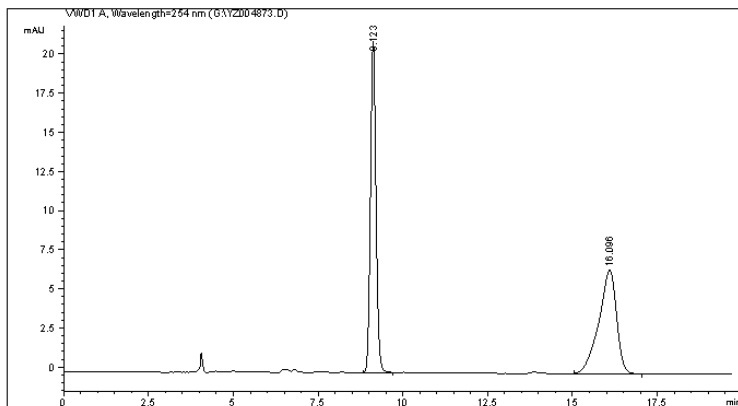

=====  
 Area Percent Report  
 =====

Sorted By : Signal  
 Multiplier: : 1.0000  
 Dilution: : 1.0000  
 Use Multiplier & Dilution Factor with ISTDs

Signal 1: WVD1 A, Wavelength=254 nm

| Peak # | RetTime [min] | Type | Width [min] | Area mAU  | Area %  | Height [mAU] |
|--------|---------------|------|-------------|-----------|---------|--------------|
| 1      | 9.123         | BB   | 0.1771      | 241.63203 | 50.1311 | 21.13414     |
| 2      | 16.096        | BB   | 0.5276      | 240.36856 | 49.8689 | 6.63346      |

Totals : 482.00060 27.76760

=====  
 \*\*\* End of Report \*\*\*

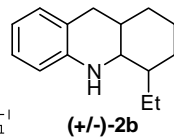

Data File G:\YZ004874.D  
 Sample Name: MC-6-11A

=====  
 Acq. Operator : ZHOU  
 Acq. Instrument : Instrument 1 Location : Vial 1  
 Injection Date : 8/27/2013 11:02:30 AM  
 Acq. Method : C:\HPCHEM\1\METHODS\DEF.LC.M  
 Last changed : 8/27/2013 9:51:22 AM by ZHOU  
 (modified after loading)  
 Analysis Method : C:\CHEM32\1\METHODS\DEF.LC.M  
 Last changed : 11/19/2013 2:42:02 PM by B  
 (modified after loading)  
 Sample Info : OJ-H, H/1-PrOH = 95/5, 0.8 mL/min, 30 oC, 254 nm

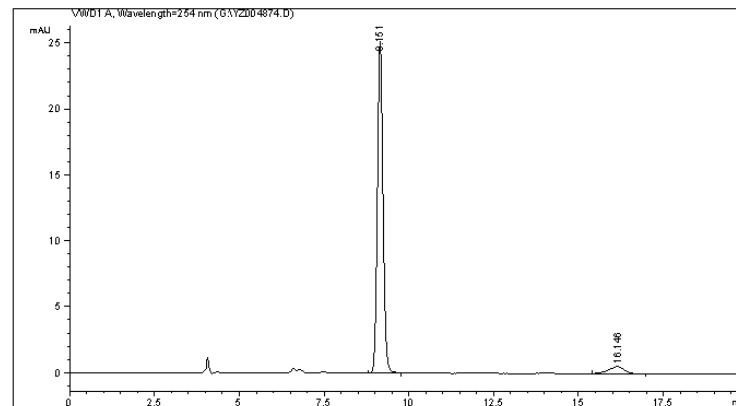

=====  
 Area Percent Report  
 =====

Sorted By : Signal  
 Multiplier: : 1.0000  
 Dilution: : 1.0000  
 Use Multiplier & Dilution Factor with ISTDs

Signal 1: WVD1 A, Wavelength=254 nm

| Peak # | RetTime [min] | Type | Width [min] | Area mAU  | Area %  | Height [mAU] |
|--------|---------------|------|-------------|-----------|---------|--------------|
| 1      | 9.151         | BB   | 0.1781      | 289.67542 | 94.2609 | 25.13462     |
| 2      | 16.146        | BB   | 0.4565      | 17.63706  | 5.7391  | 5.50867e-1   |

Totals : 307.31247 25.68549

=====  
 \*\*\* End of Report \*\*\*

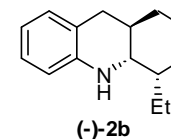

Data File C:\CHEM32\1\DATA\ZHOU-11\YZN001323.D  
 Sample Name: MC-6-12C+-

=====  
 Acq. Operator :  
 Acq. Instrument : Instrument 1 Location : Vial 1  
 Injection Date : 12/27/2011 10:25:11 AM  
 Acq. Method : C:\CHEM32\1\METHODS\SW.M  
 Last changed : 12/27/2011 10:21:06 AM  
 (modified after loading)  
 Analysis Method : C:\CHEM32\1\METHODS\ABC LC.M  
 Last changed : 9/20/2012 5:02:06 PM by ZC  
 (modified after loading)  
 Sample Info : 0J-H, H/i-PrOH = 95/5, 0.8 mL/min, 30 oC, 254 nm

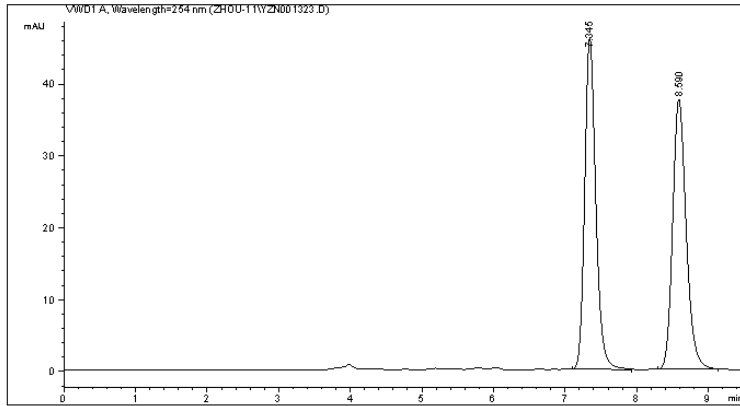

=====  
 Area Percent Report  
 =====

Sorted By : Signal  
 Multiplier: : 1.0000  
 Dilution: : 1.0000  
 Use Multiplier & Dilution Factor with ISTDs

Signal 1: VWD1 A, Wavelength=254 nm

| Peak # | RetTime [min] | Type | Width [min] | Area mAU*s | Height [mAU] | Area %  |
|--------|---------------|------|-------------|------------|--------------|---------|
| 1      | 7.345         | BB   | 0.1636      | 497.28882  | 46.15646     | 50.1161 |
| 2      | 8.590         | BB   | 0.2017      | 494.98401  | 37.58570     | 49.8839 |

Totals : 992.27283 83.74216

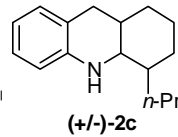

=====  
 \*\*\* End of Report \*\*\*

Data File C:\CHEM32\1\DATA\ZHOU-11\YZN001330.D  
 Sample Name: MC-6-12A

=====  
 Acq. Operator :  
 Acq. Instrument : Instrument 1 Location : Vial 1  
 Injection Date : 12/27/2011 4:22:17 PM  
 Acq. Method : C:\CHEM32\1\METHODS\SW.M  
 Last changed : 12/27/2011 4:17:03 PM  
 (modified after loading)  
 Analysis Method : C:\CHEM32\1\METHODS\ABC LC.M  
 Last changed : 9/20/2012 4:59:37 PM by ZC  
 (modified after loading)  
 Sample Info : 0J-H, H/i-PrOH = 95/5, 0.8 mL/min, 30 oC, 254 nm

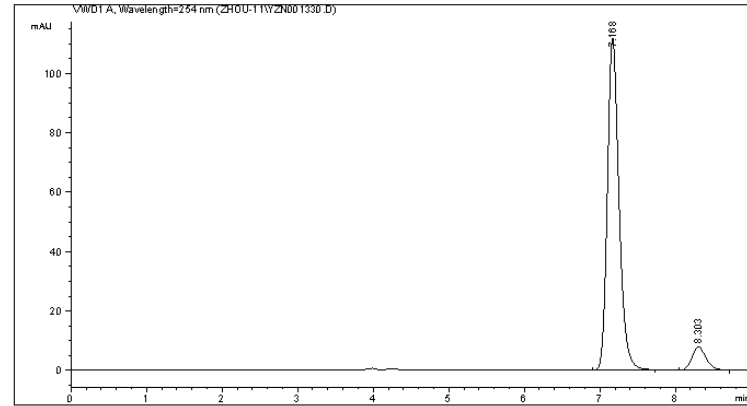

=====  
 Area Percent Report  
 =====

Sorted By : Signal  
 Multiplier: : 1.0000  
 Dilution: : 1.0000  
 Use Multiplier & Dilution Factor with ISTDs

Signal 1: VWD1 A, Wavelength=254 nm

| Peak # | RetTime [min] | Type | Width [min] | Area mAU*s | Height [mAU] | Area %  |
|--------|---------------|------|-------------|------------|--------------|---------|
| 1      | 7.168         | VB   | 0.1636      | 1191.63025 | 111.81642    | 92.1396 |
| 2      | 8.303         | BB   | 0.1970      | 101.65765  | 7.88729      | 7.8604  |

Totals : 1293.28790 119.70371

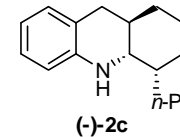

=====  
 \*\*\* End of Report \*\*\*

Data File C:\CHEM32\1\DATA\ZHOU-11\YZN001324.D  
 Sample Name: MC-6-12D+-

=====  
 Acq. Operator :  
 Acq. Instrument : Instrument 1 Location : Vial 1  
 Injection Date : 12/27/2011 10:55:34 AM  
 Acq. Method : C:\CHEM32\1\METHODS\SW.M  
 Last changed : 12/27/2011 10:49:42 AM  
 (modified after loading)  
 Analysis Method : C:\CHEM32\1\METHODS\SW.M  
 Last changed : 12/1/2011 7:50:33 PM  
 Sample Info : 0J-H, H/i-PrOH = 98/2, 0.7 mL/min, 30 oC, 254 nm

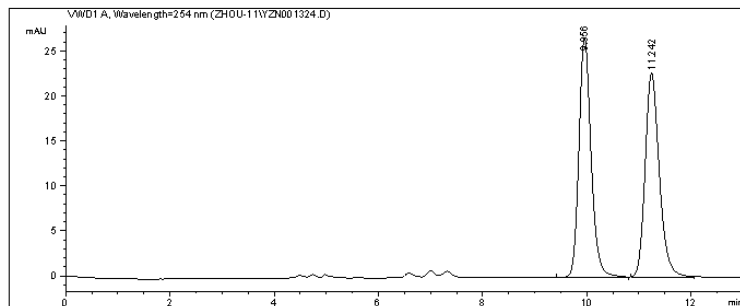

=====  
 Area Percent Report  
 =====

Sorted By : Signal  
 Multiplier: : 1.0000  
 Dilution: : 1.0000  
 Use Multiplier & Dilution Factor with ISTDs

Signal 1: VWD1 A, Wavelength=254 nm

| Peak #   | RetTime [min] | Type | Width [min] | Area mAU  | Height [mAU] | Area %  |
|----------|---------------|------|-------------|-----------|--------------|---------|
| 1        | 9.956         | BB   | 0.2476      | 432.08426 | 26.62695     | 50.2199 |
| 2        | 11.242        | BB   | 0.2890      | 428.30002 | 22.65200     | 49.7801 |
| Totals : |               |      |             | 860.38428 | 49.27895     |         |

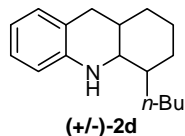

=====  
 \*\*\* End of Report \*\*\*

Data File C:\CHEM32\1\DATA\ZHOU-11\YZN001331.D  
 Sample Name: MC-6-12B

=====  
 Acq. Operator :  
 Acq. Instrument : Instrument 1 Location : Vial 1  
 Injection Date : 12/27/2011 4:35:50 PM  
 Acq. Method : C:\CHEM32\1\METHODS\SW.M  
 Last changed : 12/27/2011 4:32:33 PM  
 (modified after loading)  
 Analysis Method : C:\CHEM32\1\METHODS\ABC LC.M  
 Last changed : 9/20/2012 5:00:51 PM by ZC  
 (modified after loading)  
 Sample Info : 0J-H, H/i-PrOH = 98/2, 0.7 mL/min, 30 oC, 254 nm

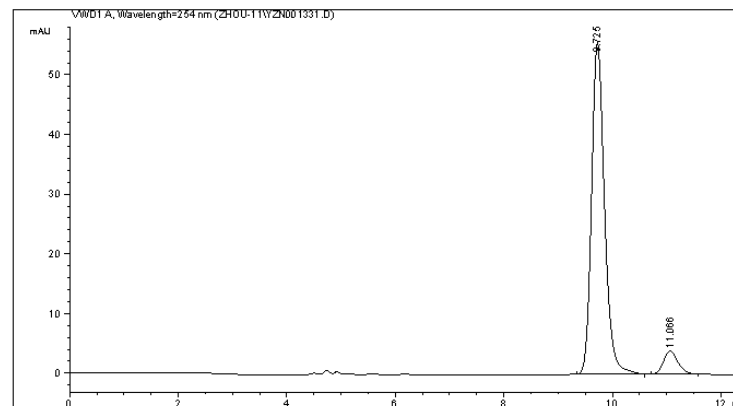

=====  
 Area Percent Report  
 =====

Sorted By : Signal  
 Multiplier: : 1.0000  
 Dilution: : 1.0000  
 Use Multiplier & Dilution Factor with ISTDs

Signal 1: VWD1 A, Wavelength=254 nm

| Peak #   | RetTime [min] | Type | Width [min] | Area mAU  | Height [mAU] | Area %  |
|----------|---------------|------|-------------|-----------|--------------|---------|
| 1        | 9.725         | BB   | 0.2534      | 922.24341 | 55.54384     | 92.7427 |
| 2        | 11.066        | BB   | 0.2851      | 72.16734  | 3.88573      | 7.2573  |
| Totals : |               |      |             | 994.41075 | 59.42957     |         |

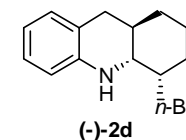

=====  
 \*\*\* End of Report \*\*\*

Data File C:\HPCHEM\1\DATA\ZHOU-12\YZ002285.D  
 0J-H, H/i-PrOH =95/5, 0.8 mL/min, 30 oC, 254 nm

Sample Name: MC-6-86B(+)

=====  
 Injection Date : 5/16/2012 10:32:06 AM  
 Sample Name : MC-6-86B(+ ) Location : Vial 1  
 Acq. Operator : ZX  
 Acq. Method : C:\HPCHEM\1\METHODS\SW.M  
 Last changed : 5/16/2012 10:12:47 AM by ZX  
 (modified after loading)  
 Analysis Method : C:\HPCHEM\1\METHODS\SW.M  
 Last changed : 9/20/2012 3:58:10 PM by ZX  
 (modified after loading)  
 =====

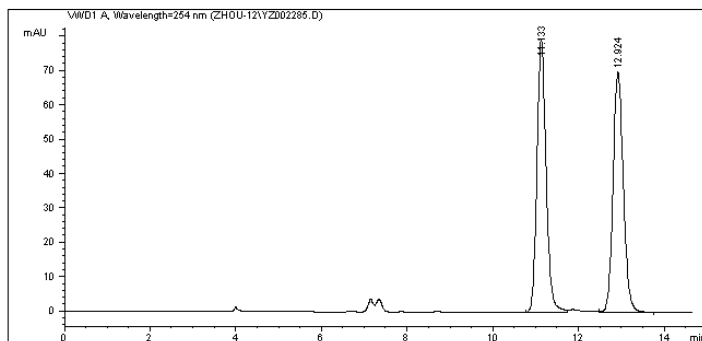

=====  
 Area Percent Report  
 =====

Sorted By : Signal  
 Multiplier : 1.0000  
 Dilution : 1.0000

Signal 1: VWD1 A, Wavelength=254 nm

| Peak # | RetTime [min] | Type | Width [min] | Area mAU   | Height [mAU] | Area %  |
|--------|---------------|------|-------------|------------|--------------|---------|
| 1      | 11.133        | BV   | 0.2271      | 1165.26477 | 79.12371     | 50.1144 |
| 2      | 12.924        | VB   | 0.2577      | 1159.94458 | 69.89375     | 49.8856 |

Totals : 2325.20935 149.01746

Results obtained with enhanced integrator!

=====  
 \*\*\* End of Report \*\*\*

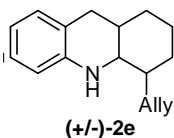

Data File C:\HPCHEM\1\DATA\ZHOU-12\YZ002287.D  
 0J-H, H/i-PrOH =95/5, 0.8 mL/min, 30 oC, 254 nm

Sample Name: MC-6-86A

=====  
 Injection Date : 5/16/2012 2:42:26 PM  
 Sample Name : MC-6-86A Location : Vial 1  
 Acq. Operator : ZX  
 Acq. Method : C:\HPCHEM\1\METHODS\SW.M  
 Last changed : 5/16/2012 2:34:06 PM by ZX  
 (modified after loading)  
 Analysis Method : C:\HPCHEM\1\METHODS\SW.M  
 Last changed : 9/20/2012 3:59:01 PM by ZX  
 (modified after loading)  
 =====

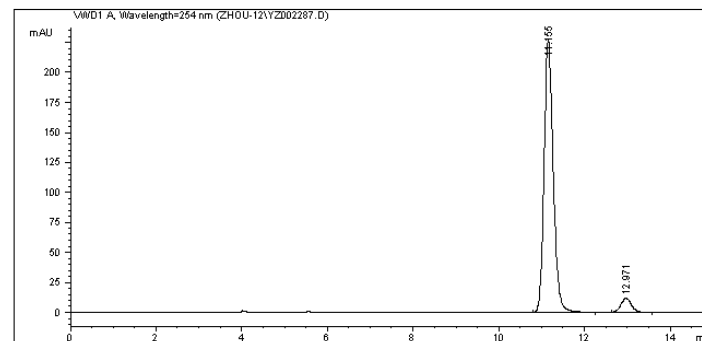

=====  
 Area Percent Report  
 =====

Sorted By : Signal  
 Multiplier : 1.0000  
 Dilution : 1.0000

Signal 1: VWD1 A, Wavelength=254 nm

| Peak # | RetTime [min] | Type | Width [min] | Area mAU   | Height [mAU] | Area %  |
|--------|---------------|------|-------------|------------|--------------|---------|
| 1      | 11.155        | BB   | 0.2264      | 3325.18237 | 226.72318    | 94.5259 |
| 2      | 12.971        | BP   | 0.2560      | 192.56322  | 11.53094     | 5.4741  |

Totals : 3517.74759 238.25412

Results obtained with enhanced integrator!

=====  
 \*\*\* End of Report \*\*\*

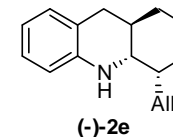

Data File C:\CHEM32\1\DATA\ZHOU-11\YZN001309.D  
 Sample Name: MC-6-10D(+)

```
=====
Acq. Operator   :
Acq. Instrument : Instrument 1           Location : Vial 1
Injection Date  : 12/23/2011 4:09:43 PM
Acq. Method     : C:\CHEM32\1\METHODS\SW.M
Last changed    : 12/23/2011 4:06:48 PM
                (modified after loading)
Analysis Method : C:\CHEM32\1\METHODS\SW.M
Last changed    : 12/1/2011 7:50:33 PM
Sample Info     : AD-H, H/1-PrOH = 98/2, 0.8 mL/min, 30 oC, 254 nm
=====
```

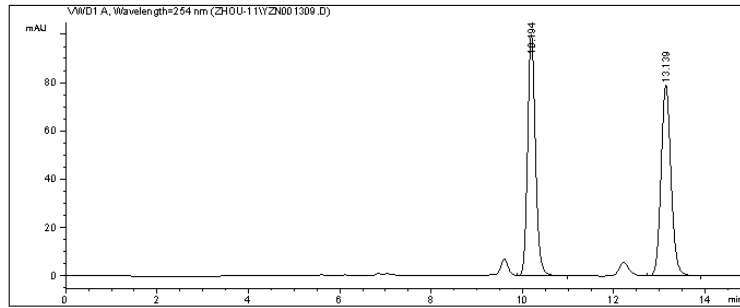

Area Percent Report

```
Sorted By      :      Simal
Multiplier:    :      1.0000
Dilution:      :      1.0000
Use Multiplier & Dilution Factor with ISTDs
```

Signal 1: VWD1 A, Wavelength=254 nm

| Peak # | RetTime [min] | Type | Width [min] | Area mAU *s | Height [mAU] | Area %  |
|--------|---------------|------|-------------|-------------|--------------|---------|
| 1      | 10.194        | VB   | 0.1833      | 1199.73535  | 100.25727    | 49.9954 |
| 2      | 13.139        | VB   | 0.2339      | 1199.95398  | 79.03433     | 50.0046 |

Totals : 2399.68933 179.29160

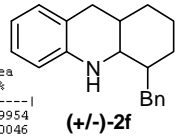

\*\*\* End of Report \*\*\*

Data File C:\CHEM32\1\DATA\ZHOU-11\YZN001314.D  
 Sample Name: MC-6-11B

```
=====
Acq. Operator   :
Acq. Instrument : Instrument 1           Location : Vial 1
Injection Date  : 12/24/2011 10:51:01 AM
Acq. Method     : C:\CHEM32\1\METHODS\SW.M
Last changed    : 12/24/2011 10:30:53 AM
                (modified after loading)
Analysis Method : C:\CHEM32\1\METHODS\SW.M
Last changed    : 12/1/2011 7:50:33 PM
Sample Info     : AD-H, H/1-PrOH = 98/2, 0.8 mL/min, 30 oC, 254 nm
=====
```

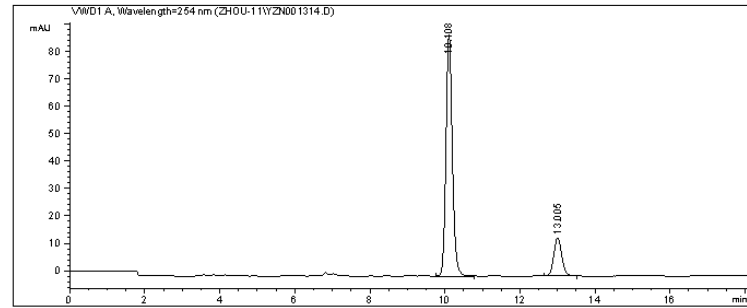

Area Percent Report

```
Sorted By      :      Simal
Multiplier:    :      1.0000
Dilution:      :      1.0000
Use Multiplier & Dilution Factor with ISTDs
```

Signal 1: VWD1 A, Wavelength=254 nm

| Peak # | RetTime [min] | Type | Width [min] | Area mAU *s | Height [mAU] | Area %  |
|--------|---------------|------|-------------|-------------|--------------|---------|
| 1      | 10.108        | EB   | 0.1816      | 1041.04370  | 88.07798     | 83.2577 |
| 2      | 13.005        | BB   | 0.2291      | 209.34323   | 14.05595     | 16.7423 |

Totals : 1250.38693 102.13393

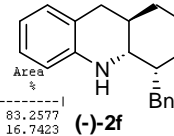

\*\*\* End of Report \*\*\*



Data File C:\HPCHEM\1\DATA\ZHOU-12\Y2002716.D  
 0J-H, H/i-PrOH = 95/5, 0.8 mL/min, 30 oC, 254 nm

Sample Name: MC-7-26C

=====  
 Injection Date : 7/16/2012 1:49:32 PM  
 Sample Name : MC-7-26C Location : Vial 1  
 Acq. Operator : ZX  
 Acq. Method : C:\HPCHEM\1\METHODS\SW.M  
 Last changed : 7/16/2012 1:35:02 PM by ZX  
 (modified after loading)  
 Analysis Method : C:\HPCHEM\1\METHODS\SW.M  
 Last changed : 9/20/2012 4:02:40 PM by ZX  
 (modified after loading)  
 =====

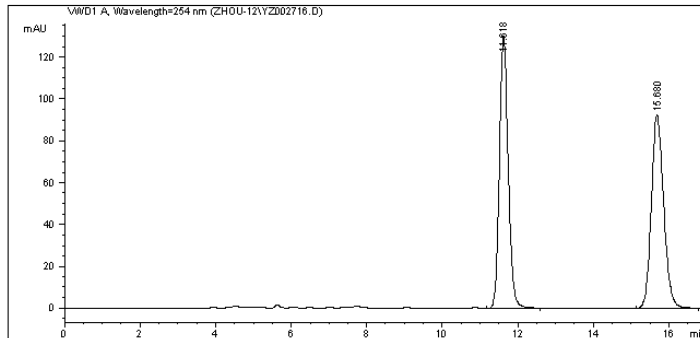

=====  
 Area Percent Report  
 =====

Sorted By : Signal  
 Multiplier : 1.0000  
 Dilution : 1.0000

Signal 1: VWD1 A, Wavelength=254 nm

| Peak # | RetTime [min] | Type | Width [min] | Area mAU*s | Height [mAU] | Area %  |
|--------|---------------|------|-------------|------------|--------------|---------|
| 1      | 11.618        | VB   | 0.2447      | 2077.62183 | 129.96194    | 49.9905 |
| 2      | 15.680        | BB   | 0.3477      | 2078.41040 | 92.11869     | 50.0095 |

Totals : 4156.03223 222.08064

Results obtained with enhanced integrator!

=====  
 \*\*\* End of Report \*\*\*

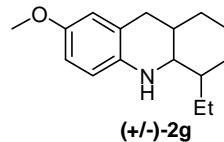

Data File C:\HPCHEM\1\DATA\ZHOU-12\Y2002717.D  
 0J-H, H/i-PrOH = 95/5, 0.8 mL/min, 30 oC, 254 nm

Sample Name: MC-7-26B

=====  
 Injection Date : 7/16/2012 2:09:19 PM  
 Sample Name : MC-7-26B Location : Vial 1  
 Acq. Operator : ZX  
 Acq. Method : C:\HPCHEM\1\METHODS\SW.M  
 Last changed : 7/16/2012 2:06:38 PM by ZX  
 (modified after loading)  
 Analysis Method : C:\HPCHEM\1\METHODS\SW.M  
 Last changed : 9/20/2012 4:02:33 PM by ZX  
 (modified after loading)  
 =====

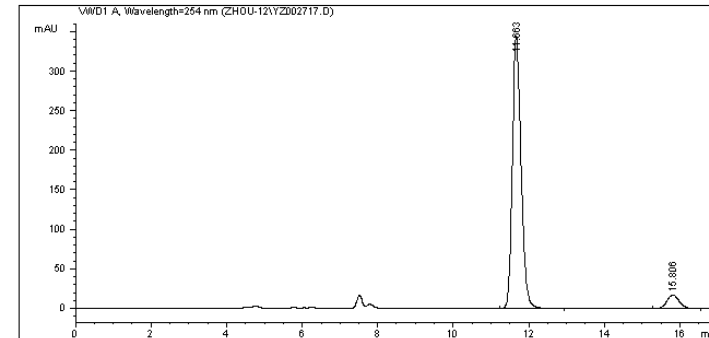

=====  
 Area Percent Report  
 =====

Sorted By : Signal  
 Multiplier : 1.0000  
 Dilution : 1.0000

Signal 1: VWD1 A, Wavelength=254 nm

| Peak # | RetTime [min] | Type | Width [min] | Area mAU*s | Height [mAU] | Area %  |
|--------|---------------|------|-------------|------------|--------------|---------|
| 1      | 11.663        | VB   | 0.2443      | 5491.03906 | 344.37958    | 93.5109 |
| 2      | 15.806        | VB   | 0.3525      | 381.04581  | 16.76591     | 6.4891  |

Totals : 5872.08487 361.14548

Results obtained with enhanced integrator!

=====  
 \*\*\* End of Report \*\*\*

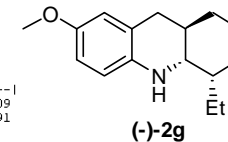

Data File C:\HPCHEM\1\DATA\ZHOU-12\YZ002747.D  
 0J-H, H/i-PrOH = 95/5, 0.8 mL/min, 30 oC, 254 nm

Sample Name: MC-7-27B

=====  
 Injection Date : 7/18/2012 2:40:47 PM  
 Sample Name : MC-7-27B Location : Vial 1  
 Acq. Operator : ZX  
 Acq. Method : C:\HPCHEM\1\METHODS\SW.M  
 Last changed : 7/18/2012 2:39:14 PM by ZX  
 (modified after loading)  
 Analysis Method : C:\HPCHEM\1\METHODS\SW.M  
 Last changed : 9/20/2012 4:06:20 PM by ZX  
 (modified after loading)  
 =====

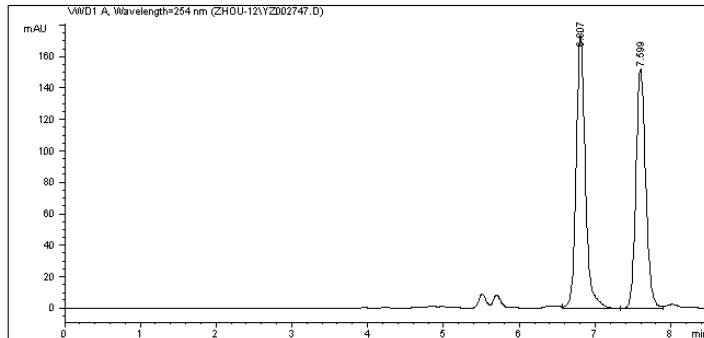

=====  
 Area Percent Report  
 =====

Sorted By : Signal  
 Multiplier : 1.0000  
 Dilution : 1.0000

Signal 1: VWD1 A, Wavelength=254 nm

| Peak # | RetTime [min] | Type | Width [min] | Area mAU   | Height *s | Area %  |
|--------|---------------|------|-------------|------------|-----------|---------|
| 1      | 6.807         | VV   | 0.1309      | 1467.12720 | 173.08138 | 51.7109 |
| 2      | 7.599         | VV   | 0.1402      | 1370.04639 | 151.84178 | 48.2891 |

Totals : 2837.17358 324.92316

Results obtained with enhanced integrator!

=====  
 \*\*\* End of Report \*\*\*

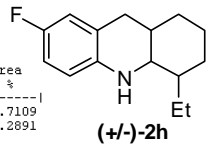

Data File C:\HPCHEM\1\DATA\ZHOU-12\YZ002769.D  
 0J-H, H/i-PrOH = 95/5, 0.8 mL/min, 30 oC, 254 nm

Sample Name: MC-7-29A

=====  
 Injection Date : 7/19/2012 6:47:17 PM  
 Sample Name : MC-7-29A Location : Vial 1  
 Acq. Operator : ZX  
 Acq. Method : C:\HPCHEM\1\METHODS\SW.M  
 Last changed : 7/19/2012 6:36:10 PM by ZX  
 (modified after loading)  
 Analysis Method : C:\HPCHEM\1\METHODS\SW.M  
 Last changed : 9/20/2012 4:05:48 PM by ZX  
 (modified after loading)  
 =====

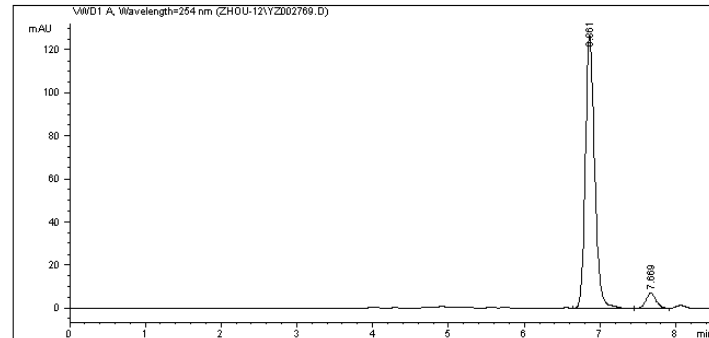

=====  
 Area Percent Report  
 =====

Sorted By : Signal  
 Multiplier : 1.0000  
 Dilution : 1.0000

Signal 1: VWD1 A, Wavelength=254 nm

| Peak # | RetTime [min] | Type | Width [min] | Area mAU   | Height *s | Area %  |
|--------|---------------|------|-------------|------------|-----------|---------|
| 1      | 6.861         | VV   | 0.1322      | 1085.46399 | 126.43060 | 94.1642 |
| 2      | 7.669         | VV   | 0.1460      | 67.27153   | 7.06579   | 5.8358  |

Totals : 1152.73552 133.49640

Results obtained with enhanced integrator!

=====  
 \*\*\* End of Report \*\*\*

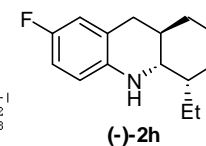

Data File D:\YZ003575.D  
 Sample Name: MC-7-95B(+)

=====  
 Acq. Operator : ZX  
 Acq. Instrument : Instrument 1 Location : Vial 1  
 Injection Date : 12/18/2012 6:33:10 AM  
 Acq. Method : C:\HPCHEM\1\METHODS\SW.M  
 Last changed : 12/18/2012 6:30:42 AM by ZX  
 (modified after loading)  
 Analysis Method : C:\CHEM32\1\METHODS\DEF.LC.M  
 Last changed : 4/17/2014 2:51:12 PM by Z  
 (modified after loading)  
 Sample Info : 0J-H, H/i-PrOH = 90/10, 1.0 mL/min, 30 oC, 254 nm  
 =====

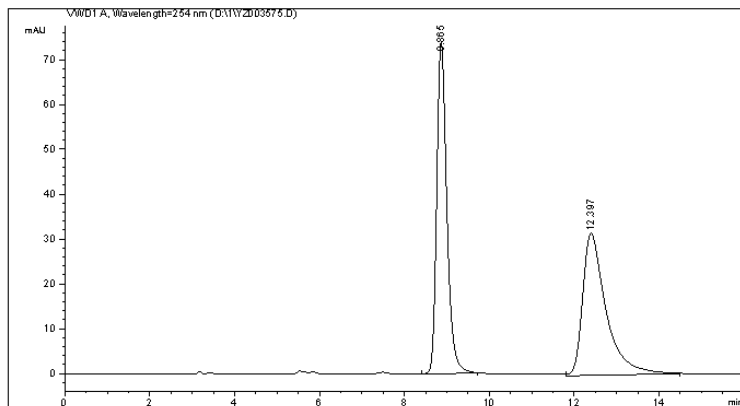

=====  
 Area Percent Report  
 =====

Sorted By : Signal  
 Multiplier: : 1.0000  
 Dilution: : 1.0000  
 Use Multiplier & Dilution Factor with ISTDs

Signal 1: VWD1 A, Wavelength=254 nm

| Peak # | RetTime [min] | Type | Width [min] | Area [mAU*s] | Height [mAU] | Area %  |
|--------|---------------|------|-------------|--------------|--------------|---------|
| 1      | 8.865         | BB   | 0.2510      | 1221.93494   | 73.97406     | 50.1783 |
| 2      | 12.397        | MM R | 0.6383      | 1213.25208   | 31.68060     | 49.8217 |

Totals : 2435.18701 105.65466

=====  
 \*\*\* End of Report \*\*\*

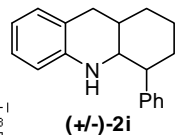

Data File D:\YZ003633.D  
 Sample Name: MC-7-99

=====  
 Acq. Operator : ZX  
 Acq. Instrument : Instrument 1 Location : Vial 1  
 Injection Date : 12/25/2012 1:01:48 AM  
 Acq. Method : C:\HPCHEM\1\METHODS\SW.M  
 Last changed : 12/25/2012 12:51:22 AM by ZX  
 (modified after loading)  
 Analysis Method : C:\CHEM32\1\METHODS\DEF.LC.M  
 Last changed : 4/17/2014 2:51:12 PM by Z  
 (modified after loading)  
 Sample Info : 0J-H, H/i-PrOH = 90/10, 1.0 mL/min, 30 oC, 254 nm  
 =====

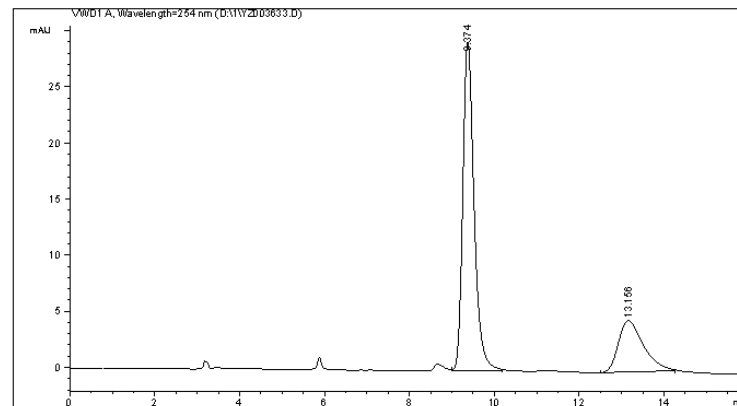

=====  
 Area Percent Report  
 =====

Sorted By : Signal  
 Multiplier: : 1.0000  
 Dilution: : 1.0000  
 Use Multiplier & Dilution Factor with ISTDs

Signal 1: VWD1 A, Wavelength=254 nm

| Peak # | RetTime [min] | Type | Width [min] | Area [mAU*s] | Height [mAU] | Area %  |
|--------|---------------|------|-------------|--------------|--------------|---------|
| 1      | 9.374         | VB   | 0.2803      | 539.14673    | 29.28313     | 74.2562 |
| 2      | 13.156        | BB   | 0.6150      | 186.91609    | 4.56129      | 25.7438 |

Totals : 726.06282 33.84442

=====  
 \*\*\* End of Report \*\*\*

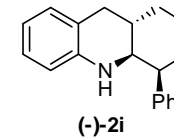

Data File D:\YZ005318.D  
 Sample Name: MC-6-20A+-

=====  
 Acq. Operator : ZHOU  
 Acq. Instrument : Instrument 1 Location : Vial 1  
 Injection Date : 11/23/2013 7:01:17 AM  
 Acq. Method : C:\HPCHEM\1\METHODS\DEMOCAL2.M  
 Last changed : 11/23/2013 6:55:42 AM by ZHOU  
 (modified after loading)  
 Analysis Method : C:\CHEM32\1\METHODS\DEF LC.M  
 Last changed : 4/17/2014 2:53:03 PM by Z  
 (modified after loading)  
 Sample Info : AD-H, H/1-PrOH = 95/5, 1.0 mL/min, 30 oC, 254 nm

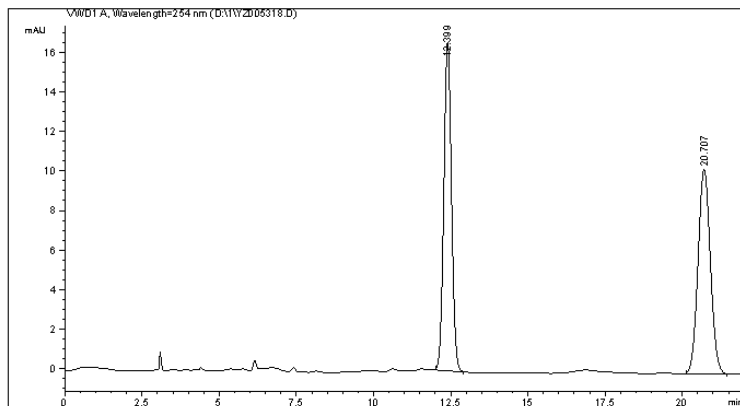

=====  
 Area Percent Report  
 =====

Sorted By : Signal  
 Multiplier: : 1.0000  
 Dilution: : 1.0000  
 Use Multiplier & Dilution Factor with ISTDs

Signal 1: VWD1 A, Wavelength=254 nm

| Peak # | RetTime [min] | Type | Width [min] | Area mAU  | Height *s [mAU] | Area %  |
|--------|---------------|------|-------------|-----------|-----------------|---------|
| 1      | 12.399        | BB   | 0.2685      | 287.15543 | 16.62440        | 49.9719 |
| 2      | 20.707        | BB   | 0.4321      | 287.47855 | 10.34006        | 50.0281 |

Totals : 574.63397 26.96446

=====  
 \*\*\* End of Report \*\*\*

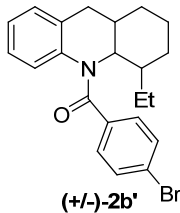

Data File D:\YZ005319.D  
 Sample Name: MC-6-20A

=====  
 Acq. Operator : ZHOU  
 Acq. Instrument : Instrument 1 Location : Vial 1  
 Injection Date : 11/23/2013 7:29:52 AM  
 Acq. Method : C:\HPCHEM\1\METHODS\DEMOCAL2.M  
 Last changed : 11/23/2013 6:55:42 AM by ZHOU  
 (modified after loading)  
 Analysis Method : C:\CHEM32\1\METHODS\DEF LC.M  
 Last changed : 4/17/2014 2:54:34 PM by Z  
 (modified after loading)  
 Sample Info : AD-H, H/1-PrOH = 95/5, 1.0 mL/min, 30 oC, 254 nm

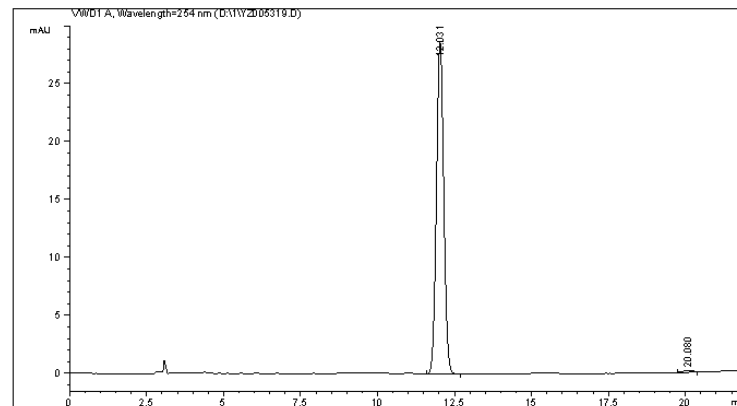

=====  
 Area Percent Report  
 =====

Sorted By : Signal  
 Multiplier: : 1.0000  
 Dilution: : 1.0000  
 Use Multiplier & Dilution Factor with ISTDs

Signal 1: VWD1 A, Wavelength=254 nm

| Peak # | RetTime [min] | Type | Width [min] | Area mAU  | Height *s [mAU] | Area %  |
|--------|---------------|------|-------------|-----------|-----------------|---------|
| 1      | 12.031        | BB   | 0.2580      | 476.76553 | 28.68786        | 99.2005 |
| 2      | 20.080        | MM R | 0.4072      | 3.84263   | 1.57294e-1      | 0.7995  |

Totals : 480.60817 28.84515

=====  
 \*\*\* End of Report \*\*\*

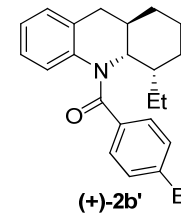

Supplement: c4cc06060a1.pdf [file c4cc06060a1.pdf]
